# Supplementary material
Source: HighWire-hosted journal article supplement (https://learnmem.cshlp.org/content/suppl/2019/08/05/26.9.363)
Supplement: SupplementalMaterial.xlsx [file SupplementalMaterial.xlsx]

## Sheet: Key
Displayed are read counts for each individual sample (columns) for mature miRNAs (rows).
SE.1	Normalized read counts for mouse BLA FC, UNP, and Naive samples sequenced at the Genomic Services lab at Hudson Alpha
SE.2	Normalized read counts for mouse BLA FC, UNP, and Naïve samples sequenced at Scripps Florida
FC = Fear Conditoning protocol
UNP = Unpaired protocol

## Sheet: SE1
miRNA	FC-1	FC-2	FC-3	UNP-1	UNP-2	UNP-3	Naïve-1	Naïve-2	Naïve-3	Naïve-4
mmu-let-7a-1-3p	1067.09	1189.08	301.927	1911.07	3308.31	1176.15	3354.63	3443.88	2996.83	2770.97
mmu-let-7a-2-3p	3.6828	5.4049	5.96399	10.01	13.4283	1	13.3429	19.1478	8.88455	10.9825
mmu-let-7a-5p	83658.5	130748	68598.6	80353.6	118050	52987.7	97232.1	145522	113819	86934.2
mmu-let-7a-5p	84346.2	129715	68233.2	80146.7	117604	52627.7	97738.1	147848	114133	86990.9
mmu-let-7b-3p	253.192	342.31	356.348	308.641	566.816	390.463	494.8	497.844	541.274	473.093
mmu-let-7b-5p	24185.9	44348.1	39478.6	23573.5	33007.5	13420.5	34918.4	42107	37080	27806
mmu-let-7c-1-3p	69.0525	94.5857	119.28	96.7633	108.133	39.0463	108.967	142.241	121.65	94.6186
mmu-let-7c-2-3p	862.695	958.468	257.197	1550.72	2694.85	911.397	2797.57	2865.79	2458.97	2292.81
mmu-let-7c-5p	80794.2	152930	123443	93535.9	129690	52080.1	107617	125822	111837	76618.2
mmu-let-7c-5p	75366.6	142945	115802	86113.5	120851	48142.2	100045	115979	103795	70695.3
mmu-let-7d-3p	3231.65	7247.06	7806.12	5718.21	7130.43	4808.41	4944.67	5510.93	5667.66	7300.84
mmu-let-7d-5p	38721.9	93575	15255.9	48100.5	86350.4	29078	72085.2	72682.5	61531	69814.2
mmu-let-7e-3p	126.136	170.254	110.334	282.782	404.97	169.518	343.58	344.661	341.714	301.597
mmu-let-7e-5p	14417.2	11447.6	12241.8	10429.6	15089.2	6168.36	17092.3	23168.9	22823.7	8947.38
mmu-let-7f-1-3p	70.8939	89.1808	26.838	87.5875	180.222	73.3308	163.451	171.419	135.319	146.152
mmu-let-7f-2-3p	122.453	72.9661	29.0745	225.225	344.896	166.661	266.859	275.364	276.105	263.581
mmu-let-7f-5p	177929	165369	44565.9	103715	173283	58628.5	165290	263892	146968	123615
mmu-let-7f-5p	225402	210335	57416.8	131905	217599	73162.3	208973	332226	186058	155145
mmu-let-7g-3p	1	4.50408	1.491	1	6.36078	2.85704	25.5739	11.8534	11.6183	19.4306
mmu-let-7g-5p	125367	165895	47696.3	103186	191899	74626	171409	239990	153753	132121
mmu-let-7i-3p	169.409	154.94	79.0229	357.023	576.71	232.373	605.992	538.875	513.254	653.037
mmu-let-7i-5p	100181	172450	123386	142456	233950	153687	223085	304432	202305	183170
mmu-miR-100-3p	2.7621	1	1	1.66833	2.82701	1	2.22382	3.64721	1	1
mmu-miR-100-5p	24313.8	34360.7	24287.6	43675.3	54938	30976.1	39014.7	52394.9	38552.1	41088.1
mmu-miR-101a-3p	19471.9	8746.92	24965.3	39028.1	41435.5	29808.5	51492.6	55546.1	43675.8	36210.2
mmu-miR-101a-5p	1	1	1	1	4.24052	2.85704	7.78337	3.64721	6.83427	9.2929
mmu-miR-101b-3p	7532.24	5849.9	15768.8	18237.4	21717.1	14926.2	24694.4	25105.6	19839.2	19408.6
mmu-miR-101b-5p	1	1	1	1	1	1	2.22382	1	1	1
mmu-miR-101c	1	1	1	1	1	1	1	1	1	1
mmu-miR-103-1-5p	1	1	1	1	1	1	1	1	1	1
mmu-miR-103-2-5p	1	1	1	1	1.41351	1	2.22382	1	1	1
mmu-miR-103-3p	3184.7	3078.99	1938.3	3021.35	5511.26	2244.69	5496.17	5738.88	4912.48	4688.69
mmu-miR-103-3p	17707.8	15663.4	9372.41	16826	24092.5	8545.42	27280.7	29328.1	23987.6	21034.9
mmu-miR-105	1	1	1	1	1	1	1	1	1	1
mmu-miR-106a-3p	1	1	1	1	1	1	1	1	1	1
mmu-miR-106a-5p	1	1	2.2365	1.66833	3.53376	1	1.11191	1.8236	1	3.37924
mmu-miR-106b-3p	254.113	486.441	647.839	326.159	609.221	432.366	605.992	859.83	675.226	600.659
mmu-miR-106b-5p	135.343	62.1563	26.0925	136.803	236.056	47.6174	261.299	261.687	211.179	254.288
mmu-miR-107-3p	3910.21	3921.25	1283.75	3357.52	6822.99	1801.84	7333.05	6797.48	6286.16	6145.99
mmu-miR-107-5p	1	2.70245	1	1	1.41351	1	1	2.73541	1	1
mmu-miR-10a-3p	1	1	1	1	2.82701	1	1	1	2.73371	1
mmu-miR-10a-5p	42.3522	47.7432	46.2209	52.5525	119.441	21.904	55.5955	47.4137	86.7952	56.6022
mmu-miR-10b-3p	1	1	1	1	1	1	1	1	1	1
mmu-miR-10b-5p	11.0484	2.70245	4.47299	1.66833	9.18779	2.85704	8.89529	10.9416	17.0857	13.5169
mmu-miR-1186	1	1	1	1	1	1	1	1	1	1
mmu-miR-1186b	1	1	1	1	1	1	1	1	1	1
mmu-miR-1187	1	1	1	1	1	1	1	1	1	1
mmu-miR-1188-3p	2.7621	4.50408	7.45499	3.33666	7.06753	1	8.89529	1.8236	1.36685	1.68962
mmu-miR-1188-5p	48.7971	88.28	82.7504	77.5775	132.163	54.2838	102.296	88.4448	107.298	75.188
mmu-miR-1190	1	1	1	1	1	1	1	1	1	1
mmu-miR-1191	1.8414	5.4049	5.21849	7.5075	10.6013	7.61879	11.1191	10.0298	11.6183	13.5169
mmu-miR-1192	1	1	1	1	1	1	1	1	1	1
mmu-miR-1193-3p	44.1936	34.231	7.45499	48.3816	99.6521	18.0946	78.9457	80.2386	59.4582	86.1706
mmu-miR-1193-5p	1	1	2.982	1.66833	4.94727	1	3.33573	1.8236	2.05028	1.68962
mmu-miR-1195	1	1	1	1	1	1	1	1	1	1
mmu-miR-1196-3p	1	1	1	1	1	1	1	1	1	1
mmu-miR-1196-5p	1	1	1	1	1	1	1	1	1	1
mmu-miR-1197-3p	18.414	9.00816	5.21849	30.03	36.0444	11.4282	26.6859	18.236	19.8194	28.7235
mmu-miR-1197-5p	1	1	1	1	1	1	1	1	1	1
mmu-miR-1198-3p	2.7621	9.90898	1	5.83916	14.1351	8.57113	12.231	13.677	12.3017	8.44809
mmu-miR-1198-5p	292.783	694.529	619.51	458.792	810.646	635.216	590.425	762.267	615.085	674.158
mmu-miR-1199-3p	1	1	1	1	1	1	1	1	1	1
mmu-miR-1199-5p	1	2.70245	1	1	1	1	2.22382	1.8236	1	1
mmu-miR-122-3p	1	1	1	1	1	1	1	1	1	1
mmu-miR-1224-3p	49.7178	104.495	34.293	43.3766	81.2766	33.3322	65.6027	66.5616	62.8753	87.0153
mmu-miR-1224-5p	328.69	474.73	814.085	440.44	672.829	239.039	818.366	1028.51	1097.58	633.607
mmu-miR-122-5p	90.2285	300.872	174.447	187.687	287.648	251.42	173.458	219.744	187.259	234.857
mmu-miR-1231-3p	1.8414	11.7106	6.70949	6.67333	7.77428	3.80939	2.22382	5.47081	4.78399	10.1377
mmu-miR-1231-5p	1	1	1	1	3.53376	1	1.11191	1	1	1.68962
mmu-miR-124-3p	25021.9	27887.5	8379.41	44432.7	59008.2	20656.4	56081.4	40027.2	46007.6	52112.1
mmu-miR-124-3p	25745.5	28327.1	8485.27	45639.7	60030.9	20990.7	57630.3	41219.9	47113.4	53318.4
mmu-miR-124-3p	24754.9	27730.7	8330.95	44190	58621.7	20527.9	55526.6	39550.3	45558.6	51634.7
mmu-miR-124-5p	463.112	375.64	216.94	518.851	737.144	283.8	877.297	1036.72	942.446	627.693
mmu-miR-124-5p	463.112	375.64	216.94	518.851	737.144	283.8	877.297	1036.72	943.129	627.693
mmu-miR-124-5p	462.191	376.541	214.704	518.017	735.023	283.8	875.074	1033.07	941.08	627.693
mmu-miR-1247-3p	1	1	1	1	1	1	1.11191	1	1.36685	1
mmu-miR-1247-5p	7.3656	38.7351	8.94599	11.6783	32.5106	1.9047	36.6931	20.9715	10.2514	16.0514
mmu-miR-1249-3p	1142.59	2293.48	768.61	1271.27	1888.44	612.36	1799.07	1654.01	1511.06	1595
mmu-miR-1249-5p	1	1	1	1	1	1	1.11191	2.73541	1.36685	1.68962
mmu-miR-1251-3p	3.6828	1	1	1	1.41351	1	1.11191	1	1	1
mmu-miR-1251-5p	19.3347	30.6277	13.419	15.8492	51.593	6.66644	80.0576	45.5901	43.7393	69.2744
mmu-miR-125a-3p	149.153	354.021	361.567	254.421	393.661	221.897	255.739	333.72	375.202	272.029
mmu-miR-125a-5p	59485.5	127251	88576.4	63141.4	116381	43753.7	122891	153368	129991	118670
mmu-miR-125b-1-3p	792.722	2047.55	2042.67	1432.26	2195.88	1520.9	1586.7	1705.07	1686.01	1645.69
mmu-miR-125b-2-3p	1085.5	1402.57	1236.78	2038.7	2937.27	976.157	2482.9	2154.59	2139.81	2017.4
mmu-miR-125b-5p	78449.1	129929	85074.9	127232	183599	58089.4	180078	152817	148528	151717
mmu-miR-125b-5p	95714.1	164631	94836.4	149802	223904	64417.8	233617	196076	189105	188711
mmu-miR-126-3p	23566.2	36630.8	16591.8	34079.9	44738.2	11246.3	106572	98282.3	43486.5	76215.3
mmu-miR-1264-3p	824.026	1008.01	241.542	585.585	1520.23	241.896	1107.46	1006.63	898.023	1950.66
mmu-miR-1264-5p	144.55	301.773	23.1105	131.798	404.97	70.4738	352.476	331.896	175.641	317.648
mmu-miR-126-5p	1430.77	1701.64	417.48	2556.72	2774.71	788.544	4174.11	3639.91	2674.25	3903.02
mmu-miR-127-3p	67316	178697	136207	159640	246287	147289	179241	209622	196994	169924
mmu-miR-127-5p	1162.84	626.067	1613.26	2738.57	2964.12	1976.12	2430.64	2398.95	2634.61	2182.99
mmu-miR-128-1-5p	92.0699	81.0734	125.989	116.783	168.207	69.5214	197.92	256.217	248.768	128.411
mmu-miR-128-2-5p	130.739	267.542	404.06	253.587	223.334	209.517	237.949	349.22	349.231	205.289
mmu-miR-128-3p	909886	1.43801e+06	444439	1.40199e+06	2.22407e+06	1.25489e+06	1.18469e+06	1.46777e+06	1.20868e+06	1.63411e+06
mmu-miR-128-3p	669292	1.12475e+06	371716	1.06388e+06	1.74497e+06	994431	893966	1.07075e+06	923573	1.25396e+06
mmu-miR-129-1-3p	417.998	435.094	108.843	186.019	790.15	405.7	600.432	648.292	498.219	536.454
mmu-miR-129-2-3p	2412.23	2800.64	984.804	2198.86	5034.2	1760.89	3595.92	2829.32	3041.25	2425.45
mmu-miR-129-5p	13168.8	38412.6	42365.2	37909.5	58815.3	44748.9	49476.7	47727.4	38929.4	37556.8
mmu-miR-129-5p	13153.1	38357.6	42273.5	37784.4	58697.2	44592.8	49405.5	47676.3	38860.4	37480
mmu-miR-1298-3p	242.144	484.639	534.523	895.06	1166.14	1221.86	813.918	825.181	993.704	703.726
mmu-miR-1298-5p	3238.1	4561.73	10736.7	5057.55	9755.31	6644.53	16076	14873.3	6775.5	9605.48
mmu-miR-1306-3p	10.1277	42.3384	23.1105	22.5225	32.5106	25.7134	30.0216	22.7951	34.8548	17.741
mmu-miR-1306-5p	1	1	1	1	1	1	1	1	1	1
mmu-miR-130a-3p	108.643	193.675	70.8224	142.642	236.056	33.3322	411.407	241.628	185.892	209.513
mmu-miR-130a-5p	2.7621	1	1	1	1	1	3.33573	1	1	1
mmu-miR-130b-3p	11.0484	29.7269	13.419	24.1908	28.9769	5.71409	37.805	20.0597	23.2365	19.4306
mmu-miR-130b-5p	278.051	572.919	529.304	409.576	807.112	414.271	591.537	795.091	554.943	625.159
mmu-miR-132-3p	8856.21	13927.5	3853.48	8499.32	19802.5	5654.09	22000.3	20175.4	15081.2	16162.9
mmu-miR-132-5p	3247.31	7042.58	981.822	2374.87	7123.36	1369.48	10340.8	7483.16	4486.7	6937.58
mmu-miR-133a-3p	14.7312	15.3139	11.1825	12.5125	21.9093	14.2852	33.3573	51.9727	29.3874	81.9465
mmu-miR-133a-3p	15.6519	15.3139	11.1825	13.3467	23.3228	15.2376	34.4692	51.9727	29.3874	84.4809
mmu-miR-133a-5p	1	1	1	1	1	1	1	1	1	1
mmu-miR-133a-5p	1	1	1	1	1	1	1	1	1	1
mmu-miR-133b-3p	4.6035	2.70245	1.491	2.5025	7.77428	1	4.44764	5.47081	5.46742	20.2754
mmu-miR-133b-5p	1	1	1	1	1	1	1	1	1	1
mmu-miR-134-3p	26.7003	37.8343	13.419	45.045	69.2618	25.7134	72.2742	60.1789	49.2068	62.5159
mmu-miR-134-5p	1087.35	2507.87	2281.97	2702.7	3573.34	1677.09	2644.12	2498.34	2715.94	2313.09
mmu-miR-135a-1-3p	10.1277	19.818	22.365	14.1808	14.8418	13.3329	12.231	18.236	11.6183	9.2929
mmu-miR-135a-2-3p	137.184	137.825	111.079	83.4166	130.043	45.7127	152.332	122.182	171.54	92.929
mmu-miR-135a-5p	2475.76	3280.77	248.997	2910.41	5257.54	545.695	4702.27	2820.2	3434.91	5149.96
mmu-miR-135a-5p	2517.19	3330.32	254.961	3001.33	5397.47	565.695	4796.78	2878.56	3511.45	5258.09
mmu-miR-135b-3p	7.3656	8.10734	5.96399	10.8442	21.9093	1	17.7906	22.7951	10.9348	19.4306
mmu-miR-135b-5p	366.438	532.382	73.0589	813.312	1194.41	221.897	1576.69	961.952	1053.85	1139.65
mmu-miR-136-3p	2293.46	1123.32	500.23	3212.38	5957.93	1732.32	5380.54	3914.37	4811.33	5173.61
mmu-miR-136-5p	6462.39	4349.14	1873.44	5214.37	13107.4	1758.03	31401.5	19158.8	10359.4	17461.4
mmu-miR-137-3p	3396.46	2733.98	747.735	5286.94	7644.95	1304.72	9312.26	6514.83	5948.55	5487.03
mmu-miR-137-5p	129.819	355.822	238.56	213.547	306.731	131.424	243.508	229.774	226.898	195.151
mmu-miR-138-1-3p	61.6869	133.321	96.9149	89.2558	132.87	86.6637	211.263	200.597	146.253	130.945
mmu-miR-138-2-3p	138.105	184.667	40.257	97.5974	272.807	76.1878	296.88	268.982	153.771	190.927
mmu-miR-138-5p	3166.28	2784.42	1389.61	5768.26	7421.61	4270.33	10228.5	7577.07	7435.69	7419.12
mmu-miR-138-5p	5659.54	5261.67	2510.1	10043.4	13024.7	6639.77	19377.3	14447.5	13779.3	13360.7
mmu-miR-139-3p	1104.84	2879.01	4980.68	2449.11	2923.13	3560.83	2852.05	3210.45	2805.47	2904.45
mmu-miR-139-5p	26241.8	65085.7	11676	28480.9	70185.5	28408.6	72476.6	57106.2	38675.8	70158.8
mmu-miR-140-3p	1688.56	1319.7	3489.68	4099.09	4284.34	3018.94	3762.71	4005.55	3553.82	3496.67
mmu-miR-140-5p	1044.07	1201.69	339.947	1867.7	2801.57	565.695	2644.12	1929.37	2010.64	2671.29
mmu-miR-141-3p	1	1	3.7275	1	4.94727	1	1.11191	9.11802	1	7.60328
mmu-miR-141-5p	1	1	1	1	1	1	1	1	1	1
mmu-miR-142-3p	46.035	38.7351	11.1825	61.7283	101.066	19.047	174.57	113.975	88.8455	117.428
mmu-miR-142-5p	91.1493	15.3139	17.1465	45.8791	133.576	24.7611	187.913	145.888	107.298	122.497
mmu-miR-143-3p	19198.4	18326.2	59641.4	44447.7	59145.3	54059.1	72383.1	76763.8	60790.9	90004.3
mmu-miR-143-5p	17.4933	34.231	41.7479	39.2058	53.0065	23.8087	138.989	112.152	110.715	90.3946
mmu-miR-144-3p	188.743	73.8669	38.7659	276.109	375.993	150.471	699.392	422.165	392.287	724.847
mmu-miR-144-5p	24.8589	12.6114	2.982	18.3517	19.7891	2.85704	36.6931	39.2075	23.2365	24.4995
mmu-miR-145-3p	132.581	157.643	51.4394	140.974	265.739	68.5691	356.923	420.341	274.738	393.681
mmu-miR-145-5p	218.206	227.906	99.8969	235.235	492.607	162.852	738.309	693.881	524.872	593.901
mmu-miR-146a-3p	1	1	1	1	1	1	1	1	1	1
mmu-miR-146a-5p	2507.06	827.85	457.736	372.038	814.179	239.039	1427.69	1727.87	1161.83	880.291
mmu-miR-146b-3p	7.3656	10.8098	11.928	12.5125	43.1119	9.52348	32.2454	21.8833	26.6537	27.0339
mmu-miR-146b-5p	7035.99	8612.7	5129.78	5831.66	13093.3	5065.54	10621	12739.7	9565.25	10151.2
mmu-miR-147-3p	1	6.30571	1	13.3467	11.308	10.4758	10.0072	5.47081	9.56798	8.44809
mmu-miR-147-5p	1	1.80163	2.2365	2.5025	4.24052	1	6.67146	7.29442	5.46742	2.53443
mmu-miR-148a-3p	13111.7	17888.4	19359.9	18948.9	47594.2	18879.3	46043.1	51058.2	33628	33642
mmu-miR-148a-5p	56.1627	44.14	152.827	88.4216	174.568	124.758	165.675	126.741	141.469	105.601
mmu-miR-148b-3p	6717.43	6352.56	4023.46	3708.7	13055.1	3476.07	23350.1	23059.5	9596	12274.2
mmu-miR-148b-5p	99.4355	94.5857	124.498	190.19	320.159	146.662	363.595	340.102	243.3	266.115
mmu-miR-149-3p	2.7621	3.60326	2.2365	3.33666	2.12026	6.66644	7.78337	5.47081	10.9348	1
mmu-miR-149-5p	2655.3	5987.72	2225.32	5087.58	9872.63	3872.25	9113.22	7896.21	7279.87	8353.47
mmu-miR-150-3p	1.8414	7.20653	38.0205	10.8442	7.06753	8.57113	14.4548	22.7951	4.78399	16.8962
mmu-miR-150-5p	1335.93	2481.75	820.049	1768.43	2619.23	872.351	2786.45	3000.74	2405.66	3043
mmu-miR-151-3p	5433.97	11309.7	10946.9	9302.62	13260.8	8480.66	10542	14172.1	8735.57	12660.3
mmu-miR-151-5p	273.448	409.872	54.4214	434.6	701.099	238.087	579.306	410.311	388.187	593.056
mmu-miR-152-3p	690.525	733.264	887.889	876.708	1115.96	545.695	1624.5	1922.08	1342.93	1392.25
mmu-miR-152-5p	2.7621	1.80163	8.94599	5.83916	12.7216	9.52348	11.1191	10.0298	9.56798	6.75847
mmu-miR-153-3p	1620.43	779.206	279.562	2083.75	4205.89	804.734	5471.71	3756.62	2746.01	5020.7
mmu-miR-153-5p	1	1	1	1.66833	1	4.76174	1	1.8236	1	1
mmu-miR-154-3p	86.5457	63.0571	13.419	44.2108	98.2387	13.3329	130.094	88.4448	94.9964	103.912
mmu-miR-154-5p	193.347	333.302	35.0385	334.501	585.899	176.184	465.891	343.75	376.568	535.609
mmu-miR-155-3p	1	1	1	1	1	1	1	1	1	1
mmu-miR-155-5p	8.28629	9.90898	1	2.5025	12.0148	4.76174	16.6787	24.6187	6.83427	21.1202
mmu-miR-15a-3p	8.28629	5.4049	2.2365	3.33666	8.48104	1.9047	8.89529	6.38262	10.9348	7.60328
mmu-miR-15a-5p	90.2285	51.3465	20.1285	108.442	139.937	56.1886	223.494	169.595	151.721	174.875
mmu-miR-15b-3p	2.7621	6.30571	1.491	4.17083	7.77428	1	12.231	13.677	9.56798	5.06886
mmu-miR-15b-5p	35.9073	21.6196	2.2365	11.6783	30.3904	5.71409	17.7906	29.1777	23.92	28.7235
mmu-miR-16-1-3p	44.1936	22.5204	28.329	88.4216	100.359	65.712	56.7074	105.769	78.5941	106.446
mmu-miR-16-2-3p	1.8414	1	1	1	1	1	3.33573	1	1	1.68962
mmu-miR-16-5p	2803.53	1989	325.783	1169.5	2885.67	421.89	5394.99	4774.2	2520.48	3638.59
mmu-miR-16-5p	2716.06	1941.26	290.745	1058.56	2749.27	377.13	5059.19	4484.25	2328.44	3407.96
mmu-miR-17-3p	6.4449	13.5122	11.1825	29.1958	27.5634	12.3805	65.6027	46.5019	31.4377	32.1028
mmu-miR-17-5p	250.43	232.411	111.825	249.416	470.697	78.0925	575.97	453.166	354.016	459.576
mmu-miR-181a-1-3p	642.648	534.184	1192.8	1385.55	1762.64	1299.96	1492.18	1850.05	1366.85	1415.06
mmu-miR-181a-2-3p	1	1	1	1	1	1	1	1	1	1
mmu-miR-181a-5p	45808.5	74869.5	23488.4	65368.6	118290	47066	117439	115099	79438.8	108497
mmu-miR-181a-5p	46715.4	76008.2	23876.8	67621.7	120827	48385	120034	117371	81324.4	110586
mmu-miR-181b-1-3p	22.0968	7.20653	7.45499	19.1858	19.0823	4.76174	14.4548	36.4721	24.6034	14.3618
mmu-miR-181b-2-3p	1	1	1	2.5025	2.12026	1	5.55955	1.8236	2.73371	2.53443
mmu-miR-181b-5p	11779.4	17577.6	6832.5	16778.4	25354.8	11391	21932.4	25690.9	18777.8	22983
mmu-miR-181b-5p	10657.1	15612	5955.79	15156	22784.3	10147.3	19424	23008.4	16921.7	20586.3
mmu-miR-181c-3p	127.057	92.784	126.735	369.536	404.263	222.85	332.461	382.957	393.654	316.804
mmu-miR-181c-5p	699.732	529.68	229.614	1228.73	2116.72	632.359	1711.23	1305.7	1213.08	1709.89
mmu-miR-181d-3p	1	1	1	1.66833	1	1	1	1	1.36685	1
mmu-miR-181d-5p	3319.12	5025.65	2155.98	4718.04	7244.92	2471.34	6379.03	6861.31	5433.25	6534.6
mmu-miR-182-3p	1	1	1	1	1	1	1	1	1	1
mmu-miR-182-5p	75.4973	29.7269	481.592	40.8741	69.2618	109.52	88.9529	594.495	183.158	301.597
mmu-miR-183-3p	1	1	1	1	1	1	1	1	1	1
mmu-miR-183-5p	67.2111	26.1237	906.527	28.3617	67.8483	159.042	85.6171	462.284	181.792	408.043
mmu-miR-1839-3p	88.3871	91.8833	23.856	84.2508	167.5	36.1892	147.884	144.977	116.866	123.342
mmu-miR-1839-5p	3661.62	3748.3	2958.14	3818.81	5007.34	2740.86	4616.65	5653.18	4837.3	3529.61
mmu-miR-1843-3p	530.323	869.288	1109.3	915.914	1159.08	773.307	843.94	1013.01	852.234	1038.27
mmu-miR-1843-5p	2907.57	3535.7	3471.04	4036.53	7507.84	3274.17	6349.01	7378.3	5646.48	5560.54
mmu-miR-1843b-3p	12.8898	29.7269	18.6375	17.5175	28.9769	14.2852	20.0144	18.236	22.5531	33.7924
mmu-miR-1843b-5p	905.048	1059.36	972.876	1223.72	1977.49	939.968	1984.76	1962.2	1618.36	1623.72
mmu-miR-184-3p	25.7796	98.189	54.4214	65.065	113.08	115.234	57.8194	93.0038	58.0913	79.4121
mmu-miR-184-5p	1	1	1	1	1	1	1	1	1	1
mmu-miR-185-3p	130.739	185.568	143.881	231.898	353.376	156.185	237.949	318.219	334.196	222.185
mmu-miR-185-5p	15989.8	8500.11	4430.5	6543.2	12674.2	3609.4	15682.4	18349.1	16295.6	9863.99
mmu-miR-186-3p	1.8414	1	1	2.5025	1	1	4.44764	3.64721	2.73371	1.68962
mmu-miR-186-5p	2232.7	2630.38	1114.52	3472.63	6334.63	2133.26	5617.37	5520.05	5233.69	5397.49
mmu-miR-187-3p	279.893	828.751	272.853	552.218	1713.88	1583.75	2222.71	2313.24	1101	3053.99
mmu-miR-187-5p	15.6519	60.3547	27.5835	44.2108	136.403	179.041	133.429	172.331	64.9256	209.513
mmu-miR-188-3p	1	1	1	4.17083	4.24052	1	6.67146	4.55901	4.10056	10.9825
mmu-miR-188-5p	23.9382	26.1237	12.6735	55.055	80.5698	20.9517	108.967	70.2088	81.3278	87.8601
mmu-miR-1892	1	1	1	1	1	1	1	1	1	1
mmu-miR-1893	1	1	1	1	1	1	1	1	1	1
mmu-miR-1894-3p	1	1	1	1	1	1	1	1	1	1
mmu-miR-1894-5p	1	1	1	1	1	1	1	1	1	1
mmu-miR-1895	1	1	1	1	1	1	1	1	1	1
mmu-miR-1896	1	1	1	1	1	1	1	1	1	1
mmu-miR-1897-3p	1	1	1	1	1	1	1	1	1	1
mmu-miR-1897-5p	1	1	1	1	1	1	1	1	1	1
mmu-miR-1898	1	1	1	1	1	1	1	1	1	1
mmu-miR-1899	1	1	1	1	1	1	1	1	1	1
mmu-miR-18a-3p	1.8414	4.50408	1	2.5025	2.12026	2.85704	8.89529	4.55901	4.78399	10.9825
mmu-miR-18a-5p	5.5242	1.80163	1.491	5.83916	10.6013	1.9047	15.5667	8.20622	5.46742	5.91367
mmu-miR-18b-3p	1	1	1	1	1	1	1	1	1	1
mmu-miR-18b-5p	1	1.80163	1	2.5025	1	1	2.22382	1.8236	1	1
mmu-miR-1900	1	1	1	1	1	1	1	1	1	1
mmu-miR-1901	1	1	1	1	1	1	1	1	1	1
mmu-miR-1902	1	1	1	1	1	1	1	1	1	1
mmu-miR-1903	1	1	1	1	1	1	1	1	1	1
mmu-miR-190-3p	1	1	1	1	1	2.85704	1.11191	1	1.36685	1
mmu-miR-1904	1	1	1	1	1	1	1	1	1	1
mmu-miR-1905	1	1	1	1	1	1	1	1	1	1
mmu-miR-190-5p	49.7178	60.3547	2.982	42.5425	86.9306	21.904	104.52	92.092	64.2422	120.808
mmu-miR-1906	1	1	1	1	1	1	1	1	1	1
mmu-miR-1906	1	1	1	1	1	1	1	1	1	1
mmu-miR-1907	1	1	1	1	1	1	1	1	1	1
mmu-miR-190b-3p	1	1	1	1	2.12026	1.9047	1	1	1	3.37924
mmu-miR-190b-5p	11.9691	16.2147	2.2365	8.34166	12.0148	3.80939	16.6787	9.11802	12.3017	23.6547
mmu-miR-1912-3p	7.3656	4.50408	2.982	1	3.53376	5.71409	8.89529	7.29442	16.4023	5.06886
mmu-miR-1912-5p	1	1.80163	1	7.5075	4.24052	1.9047	7.78337	1	6.83427	9.2929
mmu-miR-191-3p	30.3831	61.2555	26.838	39.2058	60.074	20.9517	63.3789	52.8845	47.8399	54.9126
mmu-miR-191-5p	22527.7	38127	11390.5	23795.4	45324.1	13982.4	37343.5	36430.1	32934.4	34609.3
mmu-miR-192-3p	1	1	1	1	1	1	1	1	1	1.68962
mmu-miR-192-5p	708.018	621.563	1218.14	1954.45	2410.73	1883.75	2089.28	2402.6	1901.29	1806.2
mmu-miR-1927	6.4449	7.20653	12.6735	5.005	7.77428	4.76174	7.78337	11.8534	8.20113	4.22405
mmu-miR-1928	1	1	1	1	1	1	1	1	1	1
mmu-miR-1929-3p	1	1	1	1	1	1	1	1	1	1
mmu-miR-1929-5p	1	1.80163	1	2.5025	2.82701	1	2.22382	1	4.78399	2.53443
mmu-miR-1930-3p	1	1	1	1.66833	1	1	1	1.8236	1	1.68962
mmu-miR-1930-5p	2.7621	3.60326	2.2365	1	2.12026	1	4.44764	4.55901	5.46742	2.53443
mmu-miR-1931	1	1	1	2.5025	1	1	1	1	1	1
mmu-miR-1932	1	1	1	1	1	1	1	1	1	1
mmu-miR-1933-3p	1	1	1	2.5025	1	2.85704	1	1.8236	1	4.22405
mmu-miR-1933-5p	1	1	1	1	1	1	1	1	1	1.68962
mmu-miR-193-3p	1.8414	1	1	7.5075	1.41351	1	3.33573	2.73541	8.88455	4.22405
mmu-miR-1934-3p	1	1.80163	7.45499	2.5025	2.12026	1	1.11191	1	1	2.53443
mmu-miR-1934-5p	5.5242	9.00816	12.6735	4.17083	17.6688	2.85704	12.231	14.5888	12.3017	2.53443
mmu-miR-1935	1	1	1	1	1	1	1	1	1	1
mmu-miR-193-5p	21.1761	31.5286	12.6735	17.5175	36.7512	21.904	34.4692	49.2373	21.1862	36.3268
mmu-miR-1936	4.6035	1	1	2.5025	1	1	2.22382	3.64721	1	1.68962
mmu-miR-1938	1	1	1	1	1	1	1	1	2.05028	1
mmu-miR-193b-3p	33.1452	34.231	53.6759	40.8741	144.178	179.041	211.263	153.183	127.117	122.497
mmu-miR-193b-5p	11.0484	14.4131	27.5835	10.8442	20.4958	24.7611	26.6859	28.2659	17.0857	22.8098
mmu-miR-1940	14.7312	10.8098	46.9664	35.035	8.48104	17.1423	20.0144	33.7367	47.1565	16.8962
mmu-miR-1941-3p	2.7621	1	1.491	1	2.82701	3.80939	1.11191	3.64721	2.05028	1
mmu-miR-194-1-3p	1	1	1	1	1	1	1	1	1	1
mmu-miR-1941-5p	1	1.80163	1.491	1	1	1	1.11191	1	1	3.37924
mmu-miR-1942	1	1	1	1	1	1	1	1	1	1
mmu-miR-194-2-3p	4.6035	2.70245	11.928	9.17583	11.308	4.76174	14.4548	9.11802	12.9851	9.2929
mmu-miR-1943-3p	1	2.70245	1	1	2.12026	1	3.33573	1	2.05028	1.68962
mmu-miR-1943-5p	7.3656	1.80163	8.94599	2.5025	7.06753	1.9047	10.0072	16.4124	9.56798	4.22405
mmu-miR-1945	1	4.50408	3.7275	5.005	9.18779	1	6.67146	8.20622	5.46742	2.53443
mmu-miR-194-5p	207.157	246.824	38.7659	243.577	569.643	71.4261	716.07	531.581	449.012	680.072
mmu-miR-194-5p	629.759	630.571	140.899	583.916	1381	179.994	1597.82	1334.88	907.591	1451.38
mmu-miR-1946a	1	1	1	1	1	1	1	1	1	1
mmu-miR-1946b	1	1	1	1	1	1	1	1	1	1
mmu-miR-1947-3p	1	1	1	1.66833	1	1	1	1	1	1
mmu-miR-1947-5p	25.7796	64.8588	52.9304	30.8642	87.6374	46.6651	85.6171	76.5914	49.2068	44.7749
mmu-miR-1948-3p	1	1	1	1	1	1	1	1	1	1
mmu-miR-1948-5p	1	1	1	1	1.41351	1	1	1	1	2.53443
mmu-miR-1949	1	1	1	1	1	1	1	1	1	1
mmu-miR-1950	1	1	1	1	1	1	1	1	1	1
mmu-miR-1951	1	1	2.2365	1	1	1	2.22382	1	2.05028	2.53443
mmu-miR-1952	1	1	1	1	1	1	1	1	1	1
mmu-miR-1953	1	1	1	1.66833	1	1	2.22382	1	2.05028	1
mmu-miR-195-3p	67.2111	111.701	120.025	129.296	219.093	144.757	171.234	220.656	145.57	200.22
mmu-miR-1954	1	1	1	1	1	1	1	1	1	1
mmu-miR-1955-3p	1.8414	3.60326	2.982	3.33666	4.24052	1.9047	6.67146	9.11802	2.73371	3.37924
mmu-miR-1955-5p	1	4.50408	1	1	3.53376	1	5.55955	2.73541	2.05028	4.22405
mmu-miR-195-5p	301.069	189.171	38.7659	127.627	268.566	36.1892	595.984	485.079	296.607	411.422
mmu-miR-1956	1	1	1	1	1	1	1	1	1	1
mmu-miR-1957	1	1	1	1	1	1	1	1	1	1
mmu-miR-1958	1	1	1	1	1	1	1	1	1	1.68962
mmu-miR-1960	1	2.70245	1.491	1.66833	1	1.9047	3.33573	3.64721	1	1
mmu-miR-1961	2.7621	1	11.928	3.33666	3.53376	1.9047	1	2.73541	91.5792	16.0514
mmu-miR-1962	1	1	1	1	1	1	1	1	1	1
mmu-miR-1963	1	1	1	1	1	1	1	1	1	1
mmu-miR-1964-3p	148.233	353.12	662.749	210.21	473.525	479.983	416.967	496.021	251.501	413.957
mmu-miR-1964-5p	1	1	1	1	1	1	1	1	1	1
mmu-miR-1965	1	1	5.96399	1	2.82701	1	3.33573	3.64721	2.05028	3.37924
mmu-miR-1966	1	1	1.491	1	1	1	1	1	1	1
mmu-miR-1967	1	1	1	1	1	1	1.11191	1	1	1
mmu-miR-1968-3p	1	1	1	1	1	1	1	1.8236	1	1
mmu-miR-1968-5p	8.28629	15.3139	17.892	15.015	16.9621	8.57113	23.3501	17.3243	13.6685	16.0514
mmu-miR-1969	32.2245	49.5449	15.6555	48.3816	55.8335	32.3798	47.8122	48.3255	45.1062	45.6197
mmu-miR-196a-1-3p	1	1	1	1	1	1	1	1	1	1
mmu-miR-196a-2-3p	1	1	1	1	1	1	1	1	1	1
mmu-miR-196a-5p	1	1	1	1	1	1	1	1	1	1
mmu-miR-196a-5p	1	1	1	1	1	1	1	1	1	1
mmu-miR-196b-3p	1	1	1	1	1	1	1	1	1	1
mmu-miR-196b-5p	1	1	1	1	1	1	1	1	1	1
mmu-miR-1970	1	1	1	1	1	1	1	1	1	1
mmu-miR-1971	1	1	1	1	1	1	1	1	1	1
mmu-miR-1981-3p	190.585	342.31	314.601	295.295	467.164	165.709	349.14	458.637	406.639	288.925
mmu-miR-1981-5p	3808.93	13668.1	18680	6039.36	10725.7	6817.86	12698	13791.9	8295.44	8353.47
mmu-miR-1982.1-3p	19.3347	48.6441	12.6735	26.6933	43.8187	19.9993	43.3645	38.2957	28.0205	47.3093
mmu-miR-1982.2-3p	1	3.60326	1	2.5025	2.82701	1.9047	4.44764	5.47081	7.5177	3.37924
mmu-miR-1982-5p	1	1	1	1	1	1	1	1	1	1
mmu-miR-1983	583.723	835.957	307.891	646.479	1742.15	416.176	1918.05	1402.35	995.07	1468.28
mmu-miR-199a-3p	108.643	116.205	17.892	95.0949	209.199	35.2369	265.747	238.892	222.114	208.668
mmu-miR-199a-3p	33.1452	34.231	7.45499	40.8741	70.6753	9.52348	76.7218	75.6796	66.2925	66.7399
mmu-miR-199a-5p	51.5592	21.6196	155.064	198.532	173.861	93.3301	263.523	170.507	189.993	208.668
mmu-miR-199a-5p	51.5592	21.6196	155.064	198.532	173.154	93.3301	264.635	172.331	192.043	210.358
mmu-miR-199b-3p	23.9382	29.7269	4.47299	35.035	55.1267	8.57113	71.1623	69.297	55.3576	54.0678
mmu-miR-199b-5p	3.6828	4.50408	2.2365	10.01	14.1351	7.61879	28.9097	22.7951	21.1862	16.0514
mmu-miR-19a-3p	11.9691	4.50408	1	19.1858	33.2174	2.85704	34.4692	29.1777	21.1862	34.6372
mmu-miR-19a-5p	1	1	1	1	1	1	1	1	1	1
mmu-miR-19b-1-5p	1	1	1	1	1	1	1	1	1	1
mmu-miR-19b-2-5p	1	1	1	1	1	1	1	1	1	1
mmu-miR-19b-3p	155.598	98.189	18.6375	170.17	231.108	43.808	305.775	254.393	211.179	328.631
mmu-miR-19b-3p	156.519	97.2881	18.6375	173.507	234.642	45.7127	306.887	258.04	215.963	334.544
mmu-miR-1a-1-5p	1	1	1	1	1	1	1	1	1	1
mmu-miR-1a-2-5p	1	1	1	1	1	1	1	1	1	1
mmu-miR-1a-3p	1240.18	321.591	76.7864	319.486	585.191	370.464	888.417	1672.25	464.047	979.134
mmu-miR-1a-3p	1277.93	330.599	79.7684	324.491	613.462	383.796	911.766	1741.54	487.284	1008.7
mmu-miR-1b-3p	1	4.50408	1.491	6.67333	9.89454	3.80939	12.231	9.11802	8.20113	8.44809
mmu-miR-1b-5p	1	1	1	1	1.41351	1	1	1	1	1
mmu-miR-200a-3p	34.9866	59.4539	1004.19	80.08	171.034	63.8073	81.1695	722.148	322.578	1067.84
mmu-miR-200a-5p	1	1	67.8404	1.66833	2.12026	3.80939	1.11191	18.236	2.73371	11.8273
mmu-miR-200b-3p	24.8589	32.4294	387.659	42.5425	57.247	17.1423	42.2526	280.835	93.6295	280.477
mmu-miR-200b-5p	1	1	20.874	1	1	1	1.11191	4.55901	2.05028	5.06886
mmu-miR-200c-3p	9.207	15.3139	96.1694	14.1808	16.9621	3.80939	21.1263	54.7081	22.5531	76.8777
mmu-miR-200c-5p	1	1	1	1	1	1	1	1	1	1
mmu-miR-201-3p	1	1	1	1	1	1	1	1	1	1
mmu-miR-201-5p	1	1	1	1	2.82701	1	6.67146	1	1	2.53443
mmu-miR-202-3p	1	1	1	1	1	1	1	1	1	1
mmu-miR-202-5p	1	1	1	1	1	1	2.22382	1	1	1
mmu-miR-203-3p	448.381	154.94	121.516	378.712	407.796	240.944	502.584	745.854	600.049	492.524
mmu-miR-203-5p	1.8414	2.70245	1	2.5025	2.12026	1	1.11191	2.73541	1.36685	3.37924
mmu-miR-204-3p	98.5148	517.069	257.197	221.888	346.309	183.803	249.068	223.392	220.747	394.526
mmu-miR-204-5p	6454.1	11291.7	4317.93	8229.89	14024.8	6836.91	11101.3	11503.3	11323	13301.5
mmu-miR-205-3p	1	1	1	1	1	1	1	1	1	1
mmu-miR-205-5p	7.3656	2.70245	1.491	10.01	4.94727	2.85704	7.78337	4.55901	5.46742	7.60328
mmu-miR-206-3p	21.1761	28.8261	14.1645	10.8442	29.6836	50.4745	26.6859	45.5901	24.6034	51.5334
mmu-miR-206-5p	1	1	1	1	1	1	1	1	1	1
mmu-miR-207	1	1	1	1	1	1	1	1	1	1
mmu-miR-208a-3p	1	1	1	1	1	1	1	1	1	1
mmu-miR-208a-5p	1	1	1	1	1	1	1	1	1	1
mmu-miR-208b-3p	1	1.80163	1	1	1	1	1.11191	1	1	1
mmu-miR-208b-5p	1	1	1	1	1	1	1	1	1	1
mmu-miR-20a-3p	1	1	1	1	1	1	2.22382	1	2.05028	1
mmu-miR-20a-5p	358.152	254.931	106.606	400.4	454.442	116.186	662.699	643.733	503.002	520.402
mmu-miR-20b-3p	1	1	1	1	1	1	1	1	1	1
mmu-miR-20b-5p	2.7621	3.60326	2.982	5.83916	4.94727	5.71409	14.4548	10.9416	7.5177	13.5169
mmu-miR-210-3p	154.677	78.371	76.7864	323.657	385.181	195.231	329.126	376.574	267.22	435.077
mmu-miR-210-5p	2.7621	1.80163	1	2.5025	5.65402	6.66644	7.78337	11.8534	6.15085	3.37924
mmu-miR-211-3p	1	1	1	1	1	1	1	1	1	1
mmu-miR-211-5p	10.1277	17.1155	2.982	9.17583	33.9241	9.52348	21.1263	23.7069	13.6685	41.3957
mmu-miR-212-3p	638.965	657.596	122.262	421.254	1082.75	259.039	1006.28	837.035	696.412	664.02
mmu-miR-212-5p	4387.13	7393.9	6439.62	10231	15733.7	10245.4	11953	13290.4	12091.2	10350.6
mmu-miR-2136	1	1	1	1	1	1	1	1	1	1
mmu-miR-2137	1	1	1	1	1	1	1	1	1	1
mmu-miR-2139	1	1	1	1	1	1	1	1	1	1
mmu-miR-21-3p	1	2.70245	1	5.83916	2.12026	1.9047	4.44764	7.29442	7.5177	4.22405
mmu-miR-214-3p	1	1	1.491	1	1	1	1	1	1	1.68962
mmu-miR-214-5p	1.8414	1	1	1	2.12026	1	1.11191	1	2.05028	2.53443
mmu-miR-215-3p	1	1	1	1	1	1	1	1	1	1
mmu-miR-215-5p	2.7621	3.60326	5.96399	4.17083	12.0148	7.61879	11.1191	13.677	7.5177	11.8273
mmu-miR-21-5p	12807.9	10924.2	6614.07	23943.9	33208.9	19276.5	27188.4	32857.7	22272.9	33634.4
mmu-miR-216a-3p	1	1.80163	3.7275	1	4.24052	1.9047	1.11191	1	1.36685	1
mmu-miR-216a-5p	7.3656	7.20653	6.70949	20.8542	15.5486	6.66644	23.3501	14.5888	28.7039	21.1202
mmu-miR-216b-3p	1	1	1	1	1	1	1	1	2.05028	1
mmu-miR-216b-5p	10.1277	33.3302	10.437	23.3567	40.2849	5.71409	35.5811	15.5006	21.8697	38.0164
mmu-miR-217-3p	1	1	1	1	1	1	1	1	1	1
mmu-miR-217-5p	5.5242	9.90898	21.6195	18.3517	24.0296	7.61879	22.2382	11.8534	19.136	14.3618
mmu-miR-218-1-3p	4.6035	9.00816	1.491	6.67333	14.8418	1.9047	12.231	6.38262	8.20113	6.75847
mmu-miR-218-2-3p	3.6828	5.4049	8.94599	15.8492	22.6161	7.61879	36.6931	18.236	15.7188	23.6547
mmu-miR-218-5p	106799	155828	15038.2	97710.1	244360	43817.5	257445	173856	135850	187485
mmu-miR-218-5p	40152.6	58059.4	6889.9	34001.4	93195.3	17611.8	87332.8	65331.5	48265	72161.1
mmu-miR-219-1-3p	21.1761	47.7432	17.1465	45.8791	69.2618	44.7604	60.0432	70.2088	45.1062	61.6711
mmu-miR-219-2-3p	6224.85	7129.96	7190.34	6179.5	10936.3	6754.05	9357.83	14113.8	9890.56	10808.5
mmu-miR-219-5p	220.968	63.0571	35.784	506.339	491.9	303.799	316.895	285.394	327.362	922.532
mmu-miR-219-5p	193.347	48.6441	24.6015	498.831	556.921	348.559	368.042	318.219	301.392	588.832
mmu-miR-221-3p	10693	18977.5	4652.66	9718.87	19924.8	3964.63	21666.7	20281.2	18745	14239.3
mmu-miR-221-5p	686.842	838.66	448.045	738.237	1320.92	294.276	1190.86	1482.59	1006	709.64
mmu-miR-222-3p	17020.1	39305.3	25746.6	18535.2	34368	9798.71	37185.6	35775.5	30089.9	26378.3
mmu-miR-222-5p	116.929	208.989	285.526	267.767	325.813	173.327	255.739	302.718	226.214	235.702
mmu-miR-223-3p	1	7.20653	1.491	1.66833	9.89454	1	13.3429	11.8534	7.5177	6.75847
mmu-miR-223-5p	1.8414	2.70245	1	4.17083	4.94727	1.9047	2.22382	3.64721	3.41714	4.22405
mmu-miR-22-3p	25453.7	32394.2	8721.59	41681.6	68208	29100	65066.8	53914.8	55883.2	63178.2
mmu-miR-224-3p	1	1	1	1	1	1	1	1	1	1
mmu-miR-224-5p	12.8898	14.4131	8.94599	13.3467	12.0148	1	8.89529	20.9715	15.7188	14.3618
mmu-miR-22-5p	441.015	802.627	141.645	642.308	1202.89	352.369	1715.68	1410.56	1270.49	1107.55
mmu-miR-23a-3p	995.276	1287.27	364.549	809.976	1586.66	284.752	2094.84	1889.25	1548.65	1314.52
mmu-miR-23a-5p	3.6828	1	2.2365	1.66833	2.12026	1	1	2.73541	3.41714	1
mmu-miR-23b-3p	3273.09	4094.21	1188.33	2238.07	5934.6	1299.96	5927.6	6558.59	4391.7	4979.31
mmu-miR-23b-5p	10.1277	13.5122	26.838	8.34166	13.4283	11.4282	16.6787	27.3541	21.1862	10.9825
mmu-miR-24-1-5p	159.281	100.891	62.6219	170.17	338.535	90.4731	551.508	415.782	272.687	358.199
mmu-miR-24-2-5p	859.933	599.943	564.343	1300.47	1916.71	540.934	3041.08	2065.23	1513.79	1852.67
mmu-miR-24-3p	30292.9	49801.6	28163.5	38212.3	68767.8	17029.9	122126	96855.3	67649	68517.4
mmu-miR-24-3p	30291.9	49798	28162.7	38212.3	68762.9	17028.9	122121	96850.7	67645.7	68511.5
mmu-miR-25-3p	755.894	1285.46	846.141	690.689	1409.27	546.648	1694.55	2412.63	1468.68	1507.14
mmu-miR-25-5p	19.3347	27.0245	17.1465	25.025	38.1647	23.8087	42.2526	62.9144	30.0708	43.0853
mmu-miR-26a-1-3p	1.8414	8.10734	1	1.66833	4.94727	1	5.55955	6.38262	5.46742	5.06886
mmu-miR-26a-2-3p	29.4624	46.8424	8.20049	83.4166	101.772	29.5228	56.7074	74.7678	67.6593	65.8951
mmu-miR-26a-5p	214630	293198	104456	259785	633362	192748	430890	422684	327385	451812
mmu-miR-26a-5p	214631	293204	104462	259787	633360	192754	430887	422685	327395	451820
mmu-miR-26b-3p	13.8105	31.5286	6.70949	16.6833	46.6457	13.3329	48.9241	36.4721	34.8548	57.447
mmu-miR-26b-5p	5990.07	6702.07	501.721	3768.76	9891.01	1613.28	7425.34	7695.62	4435.44	8249.56
mmu-miR-27a-3p	3002.4	3602.36	1052.64	5138.47	8502.95	3641.78	8560.6	7517.81	7472.59	8648.31
mmu-miR-27a-5p	16.5726	19.818	34.293	33.3667	58.6605	28.5704	43.3645	60.1789	71.0764	41.3957
mmu-miR-27b-3p	22514.8	26190.3	20046.5	36349.6	56174.9	27813.3	56095.9	63468.7	48016.2	44350.8
mmu-miR-27b-5p	60.7662	76.5694	58.8944	67.5675	115.201	32.3798	91.1767	131.3	80.6444	91.2394
mmu-miR-28-3p	80.1009	141.428	152.082	59.2258	102.479	48.5698	161.227	184.184	166.756	127.566
mmu-miR-28-5p	82.863	129.718	53.6759	164.331	204.252	94.2825	186.801	167.772	159.239	225.564
mmu-miR-2861	1	1	1	1	1	1	1	1	1	1
mmu-miR-28b	1	1	1	1	1	1	1	1	1	1
mmu-miR-28c	1	1	1	1	1	1	1	1	1	1
mmu-miR-290-3p	1	1	1	1	1	1	1	1	1	1
mmu-miR-290-5p	1	1	1	1	1	1	1	1	1	1.68962
mmu-miR-291a-3p	4.6035	1.80163	1.491	1	1	1	1.11191	1	1.36685	4.22405
mmu-miR-291a-5p	1	1	1	1	1	1	1.11191	1	1.36685	1.68962
mmu-miR-291b-3p	1	1	1	1	1	1	1	1	1	1
mmu-miR-291b-5p	1	1	1	1	1	1	1	1	1	1
mmu-miR-292-3p	1	1	1	1	1	1	1	2.73541	1	1
mmu-miR-292-5p	1	1	1.491	1	1	1	1	1	1	1.68962
mmu-miR-293-3p	5.5242	7.20653	2.982	1	1	1	7.78337	1.8236	4.10056	9.2929
mmu-miR-293-5p	2.7621	1.80163	2.2365	1	1	1	1	1	1	1
mmu-miR-294-3p	1.8414	1.80163	1	1	1	1	2.22382	1	1	2.53443
mmu-miR-294-5p	1	1	1	1	1	1	1	1	1	1
mmu-miR-295-3p	1	1	1	1	1	1	3.33573	1	2.73371	1
mmu-miR-295-5p	1	1	1	1	1	1	1	1	1	1
mmu-miR-296-3p	57.0834	145.031	158.046	206.039	280.581	120.948	170.122	165.948	261.069	198.53
mmu-miR-296-5p	69.9732	119.809	16.401	80.08	351.963	36.1892	247.956	160.477	166.073	242.46
mmu-miR-297a-3p	1	1	1	1	1	1	1	1	1	1
mmu-miR-297a-3p	1	1	1	1	1	1	1	1	1	1
mmu-miR-297a-5p	1	1	1	1	1	1	1	1	1	1
mmu-miR-297a-5p	1	1	1	1	1	1	1	1	1	1
mmu-miR-297a-5p	1	1	1	1	1	1	1	1	1	1
mmu-miR-297a-5p	1	1	1	1	1	1	1	1	1	1
mmu-miR-297b-3p	1	1	1	1	1	1	1	1	1	1
mmu-miR-297b-5p	1.8414	2.70245	1	1	4.94727	1	7.78337	1	2.05028	1.68962
mmu-miR-297c-3p	1	1	1	1	1	1	1	1	1	1
mmu-miR-297c-5p	1	1	1	1	1	1	1	1	1	1
mmu-miR-298-3p	1	1	1	5.005	4.24052	1	1.11191	1	1.36685	2.53443
mmu-miR-298-5p	839.678	1498.06	1763.11	1655.82	3592.42	956.158	2151.55	1943.96	2469.91	2063.02
mmu-miR-299-3p	185.061	163.048	321.31	422.922	659.4	536.172	766.106	726.706	602.099	611.642
mmu-miR-299-5p	60.7662	56.7514	11.1825	45.8791	128.629	36.1892	171.234	109.416	89.529	152.91
mmu-miR-299b-3p	2.7621	2.70245	1.491	5.83916	5.65402	11.4282	11.1191	9.11802	6.15085	10.9825
mmu-miR-299b-5p	1	1	1	1	1	1	1	1	1	1
mmu-miR-29a-3p	46256.9	39696.2	12226.2	59177.4	111043	24625.8	125959	89601.9	85438.6	94590.7
mmu-miR-29a-5p	32.2245	9.00816	9.69149	35.035	44.5254	13.3329	75.6099	48.3255	49.2068	42.2405
mmu-miR-29b-1-5p	25.7796	28.8261	1.491	18.3517	28.9769	3.80939	24.462	33.7367	21.8697	23.6547
mmu-miR-29b-2-5p	91.1493	163.048	45.4754	280.28	315.919	144.757	309.111	235.245	200.244	298.218
mmu-miR-29b-3p	1595.57	847.668	394.369	1281.28	3039.04	624.74	4938	3653.59	2375.59	3141
mmu-miR-29b-3p	2394.74	1474.64	500.975	1873.54	4341.58	986.632	6241.15	4698.51	3356.99	4228.27
mmu-miR-29c-3p	917.937	702.636	203.521	1251.25	2247.47	497.126	2780.89	1865.55	1733.86	2060.49
mmu-miR-29c-5p	57.0834	54.049	21.6195	85.0849	167.5	68.5691	211.263	160.477	156.505	137.704
mmu-miR-300-3p	8231.98	9558.56	8436.81	27329	34883.2	19030.8	29817	23664.9	26767.8	27269.6
mmu-miR-300-5p	26.7003	18.9171	2.2365	25.8592	63.6078	24.7611	51.1479	35.5603	34.1714	56.6022
mmu-miR-301a-3p	37.7487	22.5204	8.20049	41.7083	100.359	19.9993	101.184	83.8858	57.4079	76.0329
mmu-miR-301a-5p	58.9248	104.495	25.347	115.115	241.003	59.0456	161.227	150.447	154.455	210.358
mmu-miR-301b-3p	7.3656	9.00816	1.491	1	2.12026	1.9047	8.89529	10.9416	8.20113	5.06886
mmu-miR-301b-5p	1	1.80163	2.982	4.17083	13.4283	2.85704	7.78337	14.5888	4.78399	10.1377
mmu-miR-302a-3p	2.7621	2.70245	1	1	1	1	7.78337	1	3.41714	5.91367
mmu-miR-302a-5p	1	1	1	1	1	1	1	1	1	1
mmu-miR-302b-3p	11.0484	13.5122	8.20049	1	2.82701	1	14.4548	7.29442	8.20113	34.6372
mmu-miR-302b-5p	1	1	1	1	1	1	1	1	1	1
mmu-miR-302c-3p	2.7621	1	1	1	1	1	1	1	1	1.68962
mmu-miR-302c-5p	1	1	1	1	1	1	1	1	1	1
mmu-miR-302d-3p	8.28629	8.10734	2.2365	1	1	1	8.89529	4.55901	6.15085	13.5169
mmu-miR-302d-5p	1	1	1	1	1	1	1	1	1	1
mmu-miR-3057-3p	1	8.10734	2.2365	3.33666	5.65402	1.9047	5.55955	5.47081	4.78399	3.37924
mmu-miR-3057-5p	30.3831	56.7514	112.57	32.5325	84.8104	37.1416	65.6027	90.2684	60.825	69.2744
mmu-miR-3058-3p	1	4.50408	1	1	1	1	1	1	1	1.68962
mmu-miR-3058-5p	1.8414	1	1	1	1.41351	1	5.55955	2.73541	1	1
mmu-miR-3059-3p	1	1	1.491	1	2.82701	1.9047	4.44764	1.8236	1	1
mmu-miR-3059-5p	125.215	145.932	38.7659	159.326	275.634	67.6167	315.783	301.806	234.416	394.526
mmu-miR-3060-3p	1.8414	8.10734	6.70949	8.34166	13.4283	1	16.6787	9.11802	13.6685	14.3618
mmu-miR-3060-5p	1	1	1	1	1	1	1	1	1	1
mmu-miR-3061-3p	11.9691	21.6196	16.401	13.3467	18.3756	11.4282	16.6787	31.9131	27.3371	18.5858
mmu-miR-3061-5p	11.0484	20.7188	6.70949	17.5175	24.7364	7.61879	30.0216	21.8833	30.0708	29.5683
mmu-miR-3062-3p	1	1	1	1	1	1	1	1	1	1
mmu-miR-3062-5p	1.8414	4.50408	2.2365	1	7.77428	1	5.55955	10.0298	6.15085	1.68962
mmu-miR-3063-3p	1	1	1	1	1	1	1	1	1	1
mmu-miR-3063-5p	1	1	1	1	1	1	1	1	1	1
mmu-miR-3064-3p	1	1	1	1	1	1	1	1	1	1
mmu-miR-3064-5p	10.1277	35.1318	23.856	18.3517	19.7891	13.3329	14.4548	23.7069	21.1862	18.5858
mmu-miR-3065-3p	1	1	1	1	1	1	1	1	1	1
mmu-miR-3065-5p	1	2.70245	1	1	1	1	1	1	1	1
mmu-miR-3066-3p	1	1	1	1.66833	1	1	1	1	1	1
mmu-miR-3066-5p	7.3656	8.10734	6.70949	7.5075	7.06753	4.76174	6.67146	10.9416	8.88455	9.2929
mmu-miR-3067-3p	1	1	1	1	1	1	1	1	1	1
mmu-miR-3067-5p	1	1	1	1	1	1	1.11191	1	1	1
mmu-miR-3068-3p	184.14	196.378	261.67	322.822	480.592	220.945	677.153	715.765	501.636	407.198
mmu-miR-3068-5p	546.895	426.987	437.608	973.472	1595.85	466.651	1876.91	1544.59	1433.15	1407.45
mmu-miR-3069-3p	4.6035	1.80163	6.70949	20.02	12.7216	8.57113	17.7906	23.7069	22.5531	14.3618
mmu-miR-3069-5p	1	1	1	1.66833	2.12026	1	1.11191	3.64721	1.36685	1.68962
mmu-miR-3070a-3p	1	3.60326	1	4.17083	2.82701	2.85704	7.78337	4.55901	3.41714	6.75847
mmu-miR-3070a-5p	1	13.5122	9.69149	13.3467	11.308	1	7.78337	3.64721	7.5177	12.6721
mmu-miR-3070b-3p	2.7621	9.00816	9.69149	4.17083	17.6688	8.57113	7.78337	10.0298	19.136	10.1377
mmu-miR-3070b-5p	1	13.5122	9.69149	13.3467	11.308	1	7.78337	3.64721	7.5177	12.6721
mmu-miR-3071-3p	1	1	1	1	1	1	1	1	1	1
mmu-miR-3071-5p	1	1	1	1	1	1	1	1	1	1
mmu-miR-3072-3p	25.7796	75.6686	1.491	40.04	85.5171	25.7134	40.0288	53.7963	49.8902	46.4645
mmu-miR-3072-5p	3.6828	1	1	1	2.12026	1	2.22382	2.73541	1	1.68962
mmu-miR-3073-3p	1	1	1	1	1	1	1	1	1	1
mmu-miR-3073-5p	1	1	1	1	1	1	1	1	1	1
mmu-miR-3073b-3p	1	1	1	1	1	1	1	1	1	1
mmu-miR-3073b-5p	1	1	1	1	1	1	1	1	1	1
mmu-miR-3074-1-3p	1	1.80163	1	1.66833	3.53376	1	7.78337	1.8236	2.05028	1.68962
mmu-miR-3074-2-3p	1	1	1	1	1	1	1	1	1	1
mmu-miR-3074-5p	16.5726	18.0163	13.419	15.8492	35.3376	10.4758	22.2382	23.7069	20.5028	20.2754
mmu-miR-3074-5p	16.5726	18.0163	13.419	15.8492	36.0444	10.4758	23.3501	23.7069	20.5028	20.2754
mmu-miR-3075-3p	1	1	1	1	1	1	1	1	1	1
mmu-miR-3075-5p	1	1	1	1	1	1	1	1	1	1
mmu-miR-3076-3p	1	3.60326	1	5.83916	2.82701	1	4.44764	2.73541	1.36685	3.37924
mmu-miR-3076-5p	1	1	1	1	1.41351	1	1	1	1	1
mmu-miR-3077-3p	7.3656	35.1318	13.419	22.5225	47.3524	14.2852	36.6931	34.6485	34.1714	51.5334
mmu-miR-3077-5p	1	1	1	1	1	1	1	1	1	1
mmu-miR-3078-3p	1.8414	9.00816	5.96399	5.83916	6.36078	2.85704	10.0072	5.47081	6.15085	2.53443
mmu-miR-3078-5p	23.0175	15.3139	23.856	29.1958	30.3904	23.8087	30.0216	24.6187	30.0708	37.1716
mmu-miR-3079-3p	1	1	1	1	1	1	1	1	1	1
mmu-miR-3079-5p	1.8414	1	2.982	1.66833	1.41351	1	1	1	1	1
mmu-miR-3080-3p	1	1	1	1	1	1	1	1	1	1
mmu-miR-3080-5p	4.6035	3.60326	2.2365	5.005	6.36078	7.61879	2.22382	9.11802	6.15085	5.06886
mmu-miR-3081-3p	34.9866	53.1481	86.4779	125.959	115.201	78.0925	207.927	165.948	166.756	67.5847
mmu-miR-3081-5p	1	1	1	1	1	1	1	1	1	1
mmu-miR-3082-3p	12.8898	9.00816	16.401	15.015	29.6836	4.76174	12.231	14.5888	14.352	13.5169
mmu-miR-3082-5p	1	1	1	1	1	1	1	1	1	1
mmu-miR-3083-3p	4.6035	2.70245	1	4.17083	4.24052	1	3.33573	2.73541	3.41714	2.53443
mmu-miR-3083-5p	29.4624	23.4212	12.6735	34.2008	43.8187	17.1423	43.3645	54.7081	34.8548	33.7924
mmu-miR-3084-3p	9.207	9.00816	4.47299	7.5075	16.9621	2.85704	12.231	16.4124	11.6183	21.1202
mmu-miR-3084-3p	9.207	9.00816	4.47299	7.5075	16.9621	2.85704	12.231	16.4124	11.6183	21.1202
mmu-miR-3084-5p	7.3656	16.2147	1	8.34166	21.9093	2.85704	14.4548	9.11802	11.6183	17.741
mmu-miR-3084-5p	7.3656	16.2147	1	8.34166	21.9093	2.85704	14.4548	9.11802	11.6183	17.741
mmu-miR-3085-3p	75.4973	74.7677	27.5835	48.3816	161.846	53.3315	169.01	202.42	148.304	105.601
mmu-miR-3085-5p	2.7621	1	1	1	2.12026	1	3.33573	2.73541	1	10.9825
mmu-miR-3086-3p	1	1	1	1	1	1	1	1.8236	1.36685	1
mmu-miR-3086-5p	41.4315	51.3465	23.1105	25.8592	67.1415	34.2845	60.0432	69.297	56.041	48.9989
mmu-miR-3087-3p	20.2554	30.6277	17.892	33.3667	58.6605	20.9517	74.498	60.1789	48.5233	56.6022
mmu-miR-3087-5p	1	1	1.491	1	1	1	4.44764	1.8236	2.05028	1
mmu-miR-3088-3p	1	1	1	1	2.12026	1	1.11191	1	1	1
mmu-miR-3088-5p	1	1	1	1	1	1	1	1	1	1
mmu-miR-3089-3p	1	1	2.2365	3.33666	2.12026	3.80939	1	1.8236	2.05028	1
mmu-miR-3089-5p	1	1	1	1	1	1	1	1	1	1
mmu-miR-3090-3p	1	1	1	1	1	1	1	1	1	1
mmu-miR-3090-5p	1	1	1	1	1	1	1	1	1	1
mmu-miR-3091-3p	1	1	1	2.5025	2.12026	1	2.22382	1.8236	1	1.68962
mmu-miR-3091-5p	1	1	1	1	1	1	1	1	1	1
mmu-miR-3092-3p	1	1	1	1	1	1	1	1	1	1
mmu-miR-3092-5p	1	1	1	1	1	1	1	1	1	1
mmu-miR-3093-3p	22.0968	54.049	59.6399	51.7183	60.074	33.3322	44.4764	60.1789	52.6239	31.2579
mmu-miR-3093-5p	15.6519	7.20653	2.2365	2.5025	16.2553	1	15.5667	16.4124	13.6685	13.5169
mmu-miR-3094-3p	1	1	1	1	1.41351	1	1	3.64721	1.36685	2.53443
mmu-miR-3094-5p	1	1	1	1	3.53376	1	1.11191	1	2.05028	3.37924
mmu-miR-3095-3p	5.5242	12.6114	8.94599	5.005	5.65402	7.61879	6.67146	7.29442	10.9348	1.68962
mmu-miR-3095-5p	1.8414	1	1	2.5025	5.65402	1.9047	5.55955	4.55901	1.36685	7.60328
mmu-miR-3096-3p	1	1	1	1	1	1	1	1	1	1
mmu-miR-3096-5p	5.5242	2.70245	14.91	16.6833	2.82701	7.61879	5.55955	6.38262	8.88455	7.60328
mmu-miR-3096b-3p	1	1	1	1.66833	1	1	1	1	1	1
mmu-miR-3096b-5p	25.7796	13.5122	41.7479	25.025	13.4283	9.52348	16.6787	22.7951	24.6034	21.965
mmu-miR-3097-3p	8.28629	2.70245	5.96399	22.5225	21.2026	14.2852	24.462	32.8249	21.1862	16.0514
mmu-miR-3097-5p	2.7621	7.20653	1	2.5025	5.65402	1	6.67146	4.55901	4.10056	4.22405
mmu-miR-3098-3p	2.7621	8.10734	2.982	13.3467	12.0148	5.71409	6.67146	8.20622	8.88455	8.44809
mmu-miR-3098-5p	1	1	1	1	1	1	1.11191	1	1	1
mmu-miR-3099-3p	331.452	612.555	929.637	471.304	890.509	299.99	789.457	807.857	793.459	638.676
mmu-miR-3099-5p	1	1.80163	1	1.66833	1.41351	1	2.22382	1	2.05028	1
mmu-miR-30a-3p	1597.41	2486.25	2384.11	1670.83	2953.52	1713.27	3813.85	5386.02	3342.64	3067.5
mmu-miR-30a-5p	50984.6	40809.7	69232.3	78696.9	115343	107037	114777	148183	94551.5	97542.5
mmu-miR-30b-3p	84.7043	132.42	64.8584	77.5775	166.794	65.712	141.213	175.066	140.103	154.6
mmu-miR-30b-5p	1172.97	703.537	145.372	694.86	1973.26	428.557	2003.66	1704.16	1318.33	1731.01
mmu-miR-30c-1-3p	63.5283	101.792	61.8764	62.5625	110.253	57.1409	107.855	119.446	119.6	97.9979
mmu-miR-30c-2-3p	379.328	762.991	1038.48	636.469	971.079	1151.39	753.876	1140.66	978.668	808.483
mmu-miR-30c-5p	41288.8	45059.7	14813.8	31630.7	76743.5	17651.8	82119.1	96068.4	56846.1	72956
mmu-miR-30c-5p	41391.9	45149.8	14860	31730.8	76919.5	17697.5	82372.5	96311.9	56977.3	73166.4
mmu-miR-30d-3p	65.3696	76.5694	86.4779	129.296	178.102	96.1872	194.584	198.773	185.209	159.669
mmu-miR-30d-5p	90654.8	76443.2	66406.1	89497.6	141760	80536.3	112742	141435	95693.5	110368
mmu-miR-30e-3p	2798.93	3120.43	2504.13	2644.31	4904.16	1955.17	5644.06	7273.45	4248.87	4118.44
mmu-miR-30e-5p	30814.9	25425.5	16919.8	49482.7	85885.3	31826.5	77982.8	71343.1	61209.8	69102.9
mmu-miR-3100-3p	1	1	1	1	1	1	1	1	1	1
mmu-miR-3100-5p	1	3.60326	2.982	3.33666	1.41351	1	1.11191	1.8236	1.36685	1
mmu-miR-3101-3p	1	1	1	1	1	1	1	1	1	1
mmu-miR-3101-5p	1	1	1	1	1	1	1	1	1	1
mmu-miR-3102-3p	131.66	320.691	90.2054	150.15	457.269	133.329	415.854	296.336	253.552	220.495
mmu-miR-3102-3p.2-3p	34.0659	107.197	54.4214	50.05	114.494	56.1886	107.855	85.7094	83.3781	80.2569
mmu-miR-3102-5p	1.8414	1.80163	1.491	1.66833	2.12026	1.9047	1	2.73541	1.36685	1.68962
mmu-miR-3102-5p.2-5p	15.6519	83.7759	58.8944	52.5525	72.7956	42.8557	57.8194	34.6485	35.5382	38.8612
mmu-miR-3103-3p	11.0484	24.322	10.437	15.015	21.9093	11.4282	21.1263	20.0597	22.5531	20.2754
mmu-miR-3103-5p	1	1	1	1	1	1	1	1	1	1
mmu-miR-3104-3p	5.5242	14.4131	7.45499	14.1808	19.0823	14.2852	27.7978	25.5305	24.6034	16.0514
mmu-miR-3104-5p	1	1	1	1	1	1	1	1	1	1
mmu-miR-3105-3p	1	1.80163	1	1	2.82701	1	1	1.8236	1	1
mmu-miR-3105-5p	1	1	1	1	1	1	1	1	1	1
mmu-miR-3106-3p	1	1	1	1	1	1	1	1	1	1
mmu-miR-3106-5p	1	1	1	4.17083	2.12026	1.9047	7.78337	5.47081	2.73371	5.06886
mmu-miR-3107-3p	28.5417	19.818	144.627	65.8991	48.0592	26.6657	20.0144	35.5603	30.7542	26.1891
mmu-miR-3107-5p	917.017	2532.19	2786.67	1505.67	2025.55	1239.96	1781.28	2305.95	1802.2	2102.73
mmu-miR-3108-3p	1	1	1	1	1	1	1	1	1	1
mmu-miR-3108-5p	1	1	1	1	1	1	1	1	1	1
mmu-miR-3109-3p	1	1	1	1	1	1	1	1	1	1
mmu-miR-3109-5p	1	1	1	1	1	1	1	1	1	1
mmu-miR-3110-3p	1	1	1	1	1	1	1	1	1	1
mmu-miR-3110-5p	1	1	1	1	1	1	1	1.8236	1.36685	1
mmu-miR-3112-3p	1.8414	1.80163	1	1	1.41351	1	1	1	1	1
mmu-miR-3112-5p	1	1	1	1	1	1	1	1	1	1
mmu-miR-3113-3p	1	1	1	1	1	1	1	1	1	1
mmu-miR-3113-5p	1	1	1	1	1	1	1	1	1	1
mmu-miR-31-3p	1	1	1	14.1808	12.0148	1.9047	15.5667	11.8534	14.352	9.2929
mmu-miR-31-5p	998.039	461.218	109.588	337.003	544.907	103.806	1095.23	712.118	960.215	521.248
mmu-miR-320-3p	2010.81	3780.72	3166.13	2760.26	4609.44	2767.53	4563.28	5488.14	4544.11	4137.03
mmu-miR-320-5p	1	1	1	1	1	1	1	1	1	1
mmu-miR-322-3p	184.14	236.915	131.953	233.567	404.97	135.233	399.176	353.779	325.995	253.443
mmu-miR-322-5p	72.7353	45.0408	11.1825	113.447	130.043	17.1423	166.787	139.506	105.248	143.618
mmu-miR-323-3p	1603.86	2822.26	3301.82	2194.69	4006.58	1908.51	3293.48	3671.83	3327.61	2958.52
mmu-miR-323-5p	133.501	343.211	732.08	312.812	354.79	239.039	245.732	305.454	349.231	292.304
mmu-miR-32-3p	4.6035	4.50408	1	1.66833	3.53376	1	3.33573	3.64721	8.88455	5.06886
mmu-miR-324-3p	57.0834	81.9743	33.5475	75.9091	154.072	55.2362	142.325	102.122	103.881	128.411
mmu-miR-324-5p	93.9113	166.651	55.1669	231.064	359.031	121.901	349.14	236.157	250.134	300.752
mmu-miR-325-3p	39.5901	33.3302	11.1825	40.04	80.5698	17.1423	98.96	89.3566	69.7096	65.0503
mmu-miR-325-5p	295.544	516.168	224.395	467.133	776.015	325.703	572.634	641.909	582.28	573.625
mmu-miR-32-5p	162.043	91.8833	23.856	224.391	431.119	78.0925	723.854	486.902	350.598	526.316
mmu-miR-326-3p	628.838	588.233	303.418	584.75	1511.74	558.076	1636.73	1185.34	1021.04	1012.93
mmu-miR-326-5p	1	1	1	2.5025	1	1	1.11191	1	1	1.68962
mmu-miR-327	1	1	1	1	1	1	1	1	1	1
mmu-miR-328-3p	23437.3	58335.9	17984.4	37215.5	63582.3	19999.3	47564.2	48343.8	50348.8	58100.1
mmu-miR-328-5p	2.7621	5.4049	3.7275	7.5075	4.94727	4.76174	4.44764	4.55901	10.2514	1.68962
mmu-miR-329-3p	580.041	603.547	137.172	369.536	1173.92	290.466	995.16	899.949	809.861	679.227
mmu-miR-329-5p	1057.88	1424.19	754.445	1950.28	3340.82	1143.77	2383.94	2338.77	2535.52	2441.5
mmu-miR-330-3p	611.344	1359.33	523.34	910.076	1395.13	373.32	1903.59	1524.53	1393.51	1343.25
mmu-miR-330-5p	3094.47	6148.07	3217.57	5429.59	9604.07	2934.18	12640.2	10344.4	8253.75	9264.18
mmu-miR-331-3p	224.651	246.824	99.8969	290.29	580.244	183.803	670.482	563.494	573.395	466.335
mmu-miR-331-5p	15.6519	27.9253	9.69149	18.3517	49.4727	11.4282	48.9241	44.6783	34.1714	48.1541
mmu-miR-33-3p	4.6035	1	1	1	2.82701	1	2.22382	1.8236	1	4.22405
mmu-miR-335-3p	3202.19	4144.65	2767.29	3682.84	6514.14	1921.84	6061.02	7267.06	4898.13	3919.91
mmu-miR-335-5p	3158.92	882.799	141.645	788.287	1756.99	159.994	1600.04	1337.61	1038.81	1448
mmu-miR-33-5p	120.612	63.0571	49.2029	301.968	362.564	139.995	478.122	362.897	431.926	402.974
mmu-miR-337-3p	9.207	8.10734	2.2365	14.1808	26.1499	9.52348	28.9097	13.677	12.9851	27.8787
mmu-miR-337-5p	6.4449	20.7188	1	25.8592	19.0823	6.66644	20.0144	25.5305	16.4023	21.965
mmu-miR-338-3p	1133.38	1028.73	339.947	1523.19	2867.3	815.21	3463.6	2817.47	1946.4	3318.41
mmu-miR-338-5p	2862.45	4661.72	1171.92	3005.5	5834.24	2192.31	4498.79	5748.92	4139.52	5400.02
mmu-miR-339-3p	61.6869	45.0408	38.0205	63.3966	113.787	37.1416	110.079	106.681	98.4135	87.0153
mmu-miR-339-5p	243.985	167.552	169.228	391.224	614.168	227.611	720.518	647.38	634.221	587.987
mmu-miR-340-3p	3053.96	4174.38	1035.5	2800.3	6046.98	1381.86	6329	6692.63	3561.34	5349.33
mmu-miR-340-5p	15870.1	6100.33	2302.85	11759.2	20171.4	6387.4	18208.6	22163.2	14278.8	14783.3
mmu-miR-341-3p	1569.79	1590.84	3692.46	6634.96	7813.15	6080.74	5492.84	4476.95	6236.96	4888.91
mmu-miR-341-5p	8.28629	15.3139	8.94599	29.1958	19.0823	9.52348	36.6931	36.4721	18.4525	24.4995
mmu-miR-342-3p	1963.85	3015.93	566.579	921.753	3341.53	633.311	3087.78	2967.91	2271.71	2769.29
mmu-miR-342-5p	261.479	674.712	541.978	758.257	738.557	625.692	440.316	459.548	489.334	583.763
mmu-miR-343	1	1	1	1	1	1	1	1	1	1
mmu-miR-344-3p	4126.57	7239.86	2079.2	15463.8	20948.2	12431	12967.1	13547.6	15370.3	16094.5
mmu-miR-344-3p	4050.16	7089.42	1997.94	15097.6	20543.2	12211	12658	13202.9	15093.5	15736.3
mmu-miR-344-5p	1.8414	1	1	1	1	1	1.11191	4.55901	2.05028	3.37924
mmu-miR-344-5p	1.8414	1	1	1	1	1	1.11191	4.55901	2.05028	3.37924
mmu-miR-344b-3p	396.821	750.38	441.336	982.648	1523.05	880.922	1008.5	1064.99	1081.87	1115.99
mmu-miR-344b-5p	1	1	1	1	1	1	1	1	1	1
mmu-miR-344c-3p	186.902	154.94	84.2414	315.315	708.873	272.372	790.568	495.109	416.207	675.848
mmu-miR-344c-5p	6.4449	3.60326	1	4.17083	12.7216	1	5.55955	3.64721	5.46742	10.9825
mmu-miR-344d-1-5p	1	1	1	1	1	1	2.22382	1	1	1
mmu-miR-344d-2-5p	1	1.80163	1	1	1	1	1.11191	1	1	1
mmu-miR-344d-3-5p	52.4799	99.9906	10.437	74.2408	168.914	29.5228	152.332	174.154	97.7301	96.3083
mmu-miR-344d-3p	1533.89	2631.28	1827.96	1786.78	3566.27	1123.77	2535.16	2706.23	2351.67	2180.45
mmu-miR-344d-3p	1755.77	3193.39	2113.49	2180.51	4309.07	1338.05	3083.33	3140.25	2652.38	2591.87
mmu-miR-344d-3p	1755.77	3193.39	2113.49	2180.51	4309.07	1338.05	3083.33	3140.25	2652.38	2591.87
mmu-miR-344e-3p	11.9691	19.818	2.2365	11.6783	20.4958	1	14.4548	16.4124	15.0354	11.8273
mmu-miR-344e-5p	1	1	1	1	1	1	1	1	1	1
mmu-miR-344f-3p	108.643	157.643	380.205	394.561	501.088	185.708	426.974	269.893	401.172	313.424
mmu-miR-344f-5p	2.7621	1	1	8.34166	5.65402	1	6.67146	1.8236	9.56798	6.75847
mmu-miR-344g-3p	1	1	1	1	1	1	1.11191	1	1	1
mmu-miR-344g-5p	1	1	1	1	1.41351	1	1	1	1	2.53443
mmu-miR-344h-3p	30.3831	43.2392	15.6555	67.5675	153.365	38.0939	78.9457	47.4137	66.2925	87.0153
mmu-miR-344h-3p	30.3831	43.2392	15.6555	67.5675	153.365	38.0939	78.9457	47.4137	66.2925	87.0153
mmu-miR-344h-5p	1	1	1	1	1	1	1	1	1	1
mmu-miR-344h-5p	1	1	1	1	1	1	1	1	1	1
mmu-miR-344i	1.8414	1	1	1.66833	2.82701	1	1	2.73541	1	2.53443
mmu-miR-345-3p	138.105	224.303	162.519	163.497	324.4	146.662	368.042	324.602	252.868	228.943
mmu-miR-345-5p	2.7621	4.50408	1.491	10.8442	20.4958	11.4282	12.231	9.11802	10.9348	14.3618
mmu-miR-346-3p	1	1.80163	2.2365	2.5025	4.24052	1.9047	2.22382	1.8236	6.15085	4.22405
mmu-miR-346-5p	943.717	2847.48	1519.33	1743.41	3586.07	1288.53	2665.25	2832.06	2653.07	2672.13
mmu-miR-3470a	1	1	1	1	1	1	1	1	1	1
mmu-miR-3470b	1	1	1	1	1	1	1	1	1	1
mmu-miR-3471	1	1	1	1	1	1	1	1	1	1
mmu-miR-3471	1	1	1	1	1	1	1	1	1	1
mmu-miR-3472	1	1	1	1	1	1	1	1	1	1
mmu-miR-3473	1	1	1	1	1	1	1	1	1	1
mmu-miR-3473b	1	1	1	1	1	1	1	1	1	1
mmu-miR-3473c	1	1	1	1	1	1	1	1	1	1
mmu-miR-3473d	1	1	1	1	1	1	1	1	1	1
mmu-miR-3474	2.7621	19.818	20.1285	15.015	21.2026	27.6181	14.4548	23.7069	12.9851	29.5683
mmu-miR-3475	89.3078	177.461	135.681	104.271	156.899	58.0932	117.863	122.182	178.375	100.532
mmu-miR-34a-3p	1	1	1	1	1	1	1.11191	2.73541	1	1
mmu-miR-34a-5p	92.0699	58.553	7.45499	50.8841	189.41	32.3798	85.6171	109.416	62.8753	204.444
mmu-miR-34b-3p	24.8589	45.0408	16.401	15.8492	45.939	10.4758	50.036	69.297	37.5885	37.1716
mmu-miR-34b-5p	8.28629	1	4.47299	5.005	5.65402	2.85704	6.67146	4.55901	8.20113	9.2929
mmu-miR-34c-3p	8.28629	10.8098	7.45499	5.005	11.308	1.9047	14.4548	12.7652	10.2514	17.741
mmu-miR-34c-5p	512.83	532.382	1412.72	1707.54	1740.03	1237.1	1523.32	1770.72	1554.8	1405.76
mmu-miR-350-3p	69.0525	37.8343	4.47299	37.5375	101.772	18.0946	107.855	67.4734	77.9107	61.6711
mmu-miR-350-5p	45.1143	93.6849	21.6195	70.9041	90.4644	41.9033	80.0576	73.856	75.8604	102.222
mmu-miR-351-3p	1.8414	3.60326	2.2365	2.5025	3.53376	1	1.11191	7.29442	4.78399	5.91367
mmu-miR-351-5p	423.522	560.308	502.466	602.268	812.766	364.749	691.608	821.534	770.906	749.346
mmu-miR-3544-3p	1	1	1	1	1	1	1	1	1	1
mmu-miR-3544-5p	1	1	1	1	1	1	1	1	1	1
mmu-miR-3572	1	1.80163	1.491	1.66833	2.82701	1	4.44764	1.8236	2.73371	2.53443
mmu-miR-361-3p	698.811	1162.95	551.669	1061.89	1969.72	1017.11	1262.02	1755.22	1321.75	1334.8
mmu-miR-361-5p	854.409	1271.95	174.447	811.643	1591.61	342.845	1250.9	1130.64	1094.17	1249.47
mmu-miR-362-3p	34.9866	18.9171	5.96399	24.1908	54.42	16.1899	62.267	61.0908	47.8399	61.6711
mmu-miR-362-5p	123.374	51.3465	52.9304	125.959	212.733	64.7597	214.599	270.805	185.892	179.944
mmu-miR-363-3p	1.8414	7.20653	1	2.5025	5.65402	6.66644	6.67146	9.11802	5.46742	11.8273
mmu-miR-363-5p	1	1	1	1	1	1	2.22382	1	1	1
mmu-miR-365-1-5p	1.8414	9.00816	5.96399	3.33666	14.8418	12.3805	16.6787	20.0597	2.73371	11.8273
mmu-miR-365-2-5p	1	2.70245	5.21849	1	1	1	3.33573	4.55901	2.05028	1.68962
mmu-miR-365-3p	132.581	146.833	19.383	46.7133	190.117	71.4261	183.465	208.803	143.52	168.962
mmu-miR-365-3p	132.581	146.833	19.383	46.7133	190.117	71.4261	183.465	208.803	143.52	168.962
mmu-miR-367-3p	1	1	1	1	1	1	1.11191	1	1	1
mmu-miR-367-5p	1	1	1	1	1	1	1	1	1	1
mmu-miR-369-3p	2669.11	1869.19	64.8584	1123.62	3084.98	305.704	3571.46	3186.75	1584.87	2422.91
mmu-miR-369-5p	5341.9	8615.4	1508.14	6107.76	13249.5	2068.5	15672.4	12590.2	7927.76	10982.5
mmu-miR-370-3p	18278.6	47473	45796	30808.3	61903.8	29719	55257.5	55027.3	44247.8	48172.7
mmu-miR-370-5p	160.202	249.526	271.362	231.064	327.933	153.328	314.671	369.28	290.457	239.081
mmu-miR-374-3p	1	1	1	1	1	1	1	1	1	1
mmu-miR-374-5p	402.345	326.996	19.383	150.15	391.541	42.8557	346.916	407.576	220.747	323.562
mmu-miR-374c-3p	1	1	1	1	1	1	1	1	1	1
mmu-miR-374c-5p	1	1	1	1	1	1	1	1	1	1
mmu-miR-375-3p	145.471	328.798	213.213	198.532	250.897	155.233	231.277	342.838	252.868	228.943
mmu-miR-375-5p	1	1	1	1	1	1	1	1	1	1
mmu-miR-376a-3p	93.9113	32.4294	29.82	160.994	188.703	59.0456	295.768	205.156	170.857	212.047
mmu-miR-376a-5p	229.254	322.492	64.8584	344.511	689.791	101.901	669.37	485.991	544.691	664.865
mmu-miR-376b-3p	564.389	282.856	87.2234	380.38	824.781	205.707	719.406	521.551	535.123	678.381
mmu-miR-376b-5p	1170.21	1599.85	241.542	971.803	3062.36	480.936	3808.29	2437.25	1921.8	2655.24
mmu-miR-376c-3p	116.008	99.0898	7.45499	61.7283	164.673	25.7134	215.711	174.154	90.8958	125.032
mmu-miR-376c-5p	4.6035	2.70245	1.491	4.17083	15.5486	1.9047	7.78337	6.38262	3.41714	10.1377
mmu-miR-377-3p	129.819	107.197	37.275	163.497	422.638	48.5698	352.476	227.951	215.963	360.734
mmu-miR-377-5p	76.4181	116.205	43.9844	82.5825	162.553	41.9033	197.92	164.124	118.916	168.117
mmu-miR-378-3p	4700.17	5724.69	9057.07	10994.3	13985.2	12503.4	17632.7	16389.6	11911.5	10650.5
mmu-miR-378-5p	84.7043	83.7759	23.856	93.4266	264.326	80.9496	233.501	191.478	151.721	281.321
mmu-miR-378b	13.8105	22.5204	38.7659	46.7133	52.2997	62.855	45.5883	54.7081	49.8902	34.6372
mmu-miR-379-3p	450.222	503.556	129.717	154.321	418.398	55.2362	852.836	977.452	629.436	497.593
mmu-miR-379-5p	16518.3	23031.2	28667.4	30939.2	40240.4	20614.5	33859.9	37123.1	28770.9	26774.5
mmu-miR-380-3p	981.466	1612.46	372.75	1165.33	3688.54	579.027	3812.74	2215.68	2197.22	3255.05
mmu-miR-380-5p	552.42	542.291	815.576	840.005	1059.42	477.126	903.983	997.512	1018.31	1044.18
mmu-miR-381-3p	13414.6	16976.8	23346.1	39022.3	84582.1	43652.8	73570.7	52282.7	53971.6	56943.5
mmu-miR-381-5p	11.9691	9.90898	2.2365	10.8442	24.0296	5.71409	24.462	33.7367	25.2868	27.0339
mmu-miR-382-3p	1.8414	1.80163	1	1	1.41351	1	2.22382	1	2.05028	3.37924
mmu-miR-382-5p	6722.95	15492.2	9991.18	9793.11	13651.6	4947.45	11148	13285	13041.2	10991.8
mmu-miR-383-3p	1	1	1.491	1.66833	2.82701	1.9047	2.22382	1.8236	4.10056	5.06886
mmu-miR-383-5p	2675.55	6762.43	4204.62	4361.85	9732.7	6797.86	7899.01	8839.02	7022.22	8833.33
mmu-miR-384-3p	962.131	831.453	116.298	1076.07	2076.44	288.561	1924.72	1426.06	1510.37	1810.43
mmu-miR-384-5p	2443.54	2907.84	348.148	2247.24	5189.69	706.642	4671.14	3654.5	2823.24	3945.26
mmu-miR-3960	1	1	1	1	1	1	1	1	1	1
mmu-miR-3961	1	1	1	1	1	1	1	1	1	1
mmu-miR-3962	1	1	1	1	1	1	1	1	1	1
mmu-miR-3963	1	7.20653	5.21849	2.5025	9.89454	1.9047	3.33573	1.8236	4.10056	4.22405
mmu-miR-3964	1	1	1	1	1	1	1	1	1	1
mmu-miR-3965	1	1	1	1	1	1	1	1	1	1
mmu-miR-3966	1	1	1	1	1	1	1	1	1	1
mmu-miR-3967	1	1	1	1	1	1	1	1	1	1
mmu-miR-3968	1	1	1	1	1	1	1	1	1	1
mmu-miR-3969	1	1	1	1	1	1	1	1	1	1
mmu-miR-3970	1	1	1	1	1	1	1	1	1	1
mmu-miR-3971	1	1	1	1	1	1	1	1	1	1
mmu-miR-409-3p	3019.9	7335.35	5510.73	4139.13	8992.02	4415.09	5199.29	5662.29	5177.64	7189.33
mmu-miR-409-5p	1561.51	2197.99	1461.18	1972.8	3420.68	1019.01	3488.06	3577.91	3332.39	2526.82
mmu-miR-410-3p	3689.24	3287.08	835.704	1821.82	8195.51	669.501	7439.79	5253.81	3810.79	6753.4
mmu-miR-410-5p	13.8105	88.28	58.8944	48.3816	63.6078	19.9993	56.7074	78.415	62.1919	43.0853
mmu-miR-411-3p	2771.31	3495.17	636.656	3177.34	5210.89	1300.91	4125.19	4404.92	3099.34	4288.25
mmu-miR-411-5p	7856.33	11611.5	4010.79	13284.9	26245.3	7718.78	23415.7	18637.2	14312.3	25133.1
mmu-miR-412-3p	1	1	1	1	1	1.9047	1	1.8236	1	1
mmu-miR-412-5p	219.126	334.203	211.722	485.485	735.023	359.987	410.295	442.224	470.198	468.024
mmu-miR-421-3p	475.081	664.802	139.408	428.761	831.142	121.901	846.164	693.881	656.09	620.935
mmu-miR-421-5p	1	1.80163	1	1	4.24052	1	2.22382	1	2.05028	1
mmu-miR-423-3p	1989.63	2736.68	3088.6	3327.49	4919.71	2839.9	4852.38	5601.2	4425.88	4516.35
mmu-miR-423-5p	465.874	805.33	2144.05	920.919	1214.2	899.969	919.551	1329.41	1166.61	1116.84
mmu-miR-425-3p	36.828	90.0816	27.5835	81.7483	156.899	27.6181	121.198	101.21	99.7804	134.325
mmu-miR-425-5p	587.406	833.255	243.033	609.775	1555.56	259.991	2003.66	1526.36	952.014	1411.68
mmu-miR-429-3p	7.3656	1.80163	43.2389	8.34166	14.8418	1	6.67146	46.5019	23.92	83.6361
mmu-miR-429-5p	1	1	1	1	1	1	1	1	1	1
mmu-miR-431-3p	48.7971	62.1563	53.6759	135.135	184.463	116.186	186.801	124.917	170.857	133.48
mmu-miR-431-5p	182.299	405.367	162.519	261.094	703.219	148.566	1035.19	603.613	434.66	565.177
mmu-miR-432	1	1	1	1	1	1	1	1	1	1
mmu-miR-433-3p	14469.7	39901.7	25675.7	24871.5	43454.7	16880.4	30970	31914	33987.5	29185.6
mmu-miR-433-5p	18.414	70.2636	27.5835	97.5974	87.6374	28.5704	81.1695	64.738	96.3632	72.6536
mmu-miR-434-3p	27735.2	51900.5	21899.8	36439.7	78378.2	23872.5	58923.5	56405.9	54481.5	71751.3
mmu-miR-434-5p	19946	39417	29629.9	55281	85557.4	40512	88785	89522.6	65452.5	69777.9
mmu-miR-448-3p	60.7662	111.701	88.7144	106.773	224.041	112.377	190.137	192.39	158.555	175.72
mmu-miR-448-5p	12.8898	41.4375	6.70949	28.3617	57.9537	13.3329	55.5955	22.7951	36.9051	43.0853
mmu-miR-449a-3p	1	1	1	1	1	1	1	1	1	1
mmu-miR-449a-5p	17.4933	21.6196	4.47299	18.3517	61.4875	60.9503	61.1551	81.1504	36.2216	93.7738
mmu-miR-449b	1	1	1.491	1	1.41351	1	1	1	1	1
mmu-miR-449c-3p	1	1	1	1	1	1	1	1	1	1
mmu-miR-449c-5p	1	1	1.491	1	2.12026	1	1	4.55901	2.05028	3.37924
mmu-miR-450a-1-3p	6.4449	1	1	1.66833	5.65402	1	4.44764	1	4.78399	3.37924
mmu-miR-450a-2-3p	1	1	1	1	1	1	1.11191	1	1	2.53443
mmu-miR-450a-5p	89.3078	105.395	20.1285	157.657	248.07	65.712	263.523	232.51	194.777	217.961
mmu-miR-450a-5p	88.3871	106.296	20.1285	157.657	249.484	65.712	264.635	234.333	196.827	219.65
mmu-miR-450b-3p	6.4449	6.30571	1.491	2.5025	9.89454	1	16.6787	10.0298	6.83427	6.75847
mmu-miR-450b-5p	14.7312	7.20653	6.70949	30.03	28.9769	8.57113	40.0288	43.7665	26.6537	20.2754
mmu-miR-451	394.06	354.021	76.0409	257.757	597.206	148.566	961.803	820.622	457.213	863.395
mmu-miR-452-3p	1	1	1	1	1	1	1	1	1	1
mmu-miR-452-5p	1	1	1	1	1	1	1	1	1	1
mmu-miR-453	1	1	1	1	1	1	1	1	1	1
mmu-miR-455-3p	136.264	376.541	89.4599	160.16	530.772	96.1872	509.255	476.873	369.051	608.262
mmu-miR-455-5p	142.708	121.61	133.444	481.314	597.206	396.177	537.053	630.055	515.304	487.455
mmu-miR-463-3p	1	1	1	1	1	1	1.11191	1	1	1
mmu-miR-463-5p	1	1	1	1	1	1	1	1	1	1
mmu-miR-465a-3p	1	1	1	1	1	1	1	1	1	1
mmu-miR-465a-5p	1	1	1	1	1	1	1	1	1	1
mmu-miR-465b-3p	1	1	1	1	1	1	1	1	1	1
mmu-miR-465b-3p	1	1	1	1	1	1	1	1	1	1
mmu-miR-465b-5p	1	1	1	1	1.41351	1	1	1	1.36685	2.53443
mmu-miR-465b-5p	1	1	1	1	1.41351	1	1	1	1.36685	2.53443
mmu-miR-465c-3p	1	1	1	1	1	1	1	1	1	1
mmu-miR-465c-3p	1	1	1	1	1	1	1	1	1	1
mmu-miR-465c-5p	1	1	1	1	2.12026	1	1	1	1	1
mmu-miR-465c-5p	1	1	1	1	2.12026	1	1	1	1	1
mmu-miR-466a-3p	1	1	1	1	1	1	1	1	1	1
mmu-miR-466a-5p	1	1	1	1	1	1	1	1	1	1
mmu-miR-466b-3p	1	1	1	1	1	1	1	1	1	1
mmu-miR-466b-3p	1	1	1	1	1	1	1	1	1	1
mmu-miR-466b-3p	1	1	1	1	1	1	1	1	1	1
mmu-miR-466b-3p	1	1	1	1	1	1	1	1	1	1
mmu-miR-466b-3p	1	1	1	1	1	1	1	1	1	1
mmu-miR-466b-3p	1	1	1	1	1	1	1	1	1	1
mmu-miR-466b-3p	1	1	1	1	1	1	1	1	1	1
mmu-miR-466b-3p	1	1	1	1	1	1	1	1	1	1
mmu-miR-466b-5p	1	1	1	1	1	1	1	1	1	1
mmu-miR-466b-5p	1	1	1	1	1	1	1	1	1	1
mmu-miR-466b-5p	1	1	1	1	1	1	1	1	1	1
mmu-miR-466b-5p	1	1	1	1	1	1	1	1	1	1
mmu-miR-466b-5p	1	1	1	1	1	1	1	1	1	1
mmu-miR-466b-5p	1	1	1	1	1	1	1	1	1	1
mmu-miR-466b-5p	1	1	1	1	1	1	1	1	1	1
mmu-miR-466b-5p	1	1	1	1	1	1	1	1	1	1
mmu-miR-466c-3p	1	1	1	1	1	1	1	1	1	1
mmu-miR-466c-3p	1	1	1	1	1	1	1	1	1	1
mmu-miR-466c-5p	1	1	1	1	1	1	1	1	1	1
mmu-miR-466c-5p	1	1	1	1	1	1	1	1	1	1
mmu-miR-466d-3p	1.8414	1	1	1	1	1	1	1	1	1
mmu-miR-466d-5p	1	1	1	1	1	1	1	1	1	1
mmu-miR-466e-3p	1	1	1	1	1	1	1	1	1	1
mmu-miR-466e-5p	1	1	1	1	1	1	1	1	1	1
mmu-miR-466f	1	1	1	1	1	1	1	1	1	1
mmu-miR-466f-3p	1	1	1	1	1	1	1	1	1	1
mmu-miR-466f-3p	1	1	1	1	1	1	1	1	1	1
mmu-miR-466f-3p	1	1	1	1	1	1	1	1	1	1
mmu-miR-466f-5p	1	1	1	1	1	1	1	1	1	1
mmu-miR-466f-5p	1	1	1	1	1	1	1	1	1	1
mmu-miR-466f-5p	1	1	1	1	1	1	1	1	1	1
mmu-miR-466g	1	1	1	1	1	1	1	1	1	1
mmu-miR-466h-3p	1	1	1	1	1	1	1	1	1	1
mmu-miR-466h-5p	1.8414	1	1	1	2.12026	1	1.11191	1	1	1
mmu-miR-466i-3p	1	1	1	1	1	1	1	1	1	1
mmu-miR-466i-5p	1	1	1	1	1	1	1	1	1	1
mmu-miR-466j	1	1	1	1	1	1	1	1	1	1
mmu-miR-466k	1	1	1	1	1	1	1	1	1	1
mmu-miR-466l-3p	1	1	1	1	1	1	1	1	1	1
mmu-miR-466l-5p	1	1	1	1	1	1	1	1	1	1
mmu-miR-466m-3p	1	1	1	1	1	1	1	1	1	1
mmu-miR-466m-5p	1	1	1	1	1	1	1	1	1	1
mmu-miR-466n-3p	1	1	1	1	1	1	1.11191	1	1	1
mmu-miR-466n-5p	1	1	1	1	2.82701	1.9047	4.44764	1.8236	2.05028	1.68962
mmu-miR-466o-3p	1	1	1	1	1	1	1	1	1	1
mmu-miR-466o-5p	1	1	1	1	1	1	1	1	1	1
mmu-miR-466p-3p	1	1	1	1	1	1	1	1	1	1
mmu-miR-466p-5p	1	1	1	1	1	1	1	1	1	1
mmu-miR-466q	1	1	1	1	1	1	1	1	1	1
mmu-miR-467a-3p	1	1	1	1	1	1	1	1	1	1
mmu-miR-467a-3p	1	1	1	1	1	1	1	1	1	1
mmu-miR-467a-3p	1	1	1	1	1	1	1	1	1	1
mmu-miR-467a-3p	1	1	1	1	1	1	1	1	1	1
mmu-miR-467a-3p	1	1	1	1	1	1	1	1	1	1
mmu-miR-467a-3p	1	1	1	1	1	1	1	1	1	1
mmu-miR-467a-3p	1	1	1	1	1	1	1	1	1	1
mmu-miR-467a-3p	1	1	1	1	1	1	1	1	1	1
mmu-miR-467a-3p	1	1	1	1	1	1	1	1	1	1
mmu-miR-467a-3p	1	1	1	1	1	1	1	1	1	1
mmu-miR-467a-5p	1	1	1	1	1	1	1	1	1	1
mmu-miR-467a-5p	1	1	1	1	1	1	1	1	1	1
mmu-miR-467a-5p	1	1	1	1	1	1	1	1	1	1
mmu-miR-467a-5p	1	1	1	1	1	1	1	1	1	1
mmu-miR-467a-5p	1	1	1	1	1	1	1	1	1	1
mmu-miR-467a-5p	1	1	1	1	1	1	1	1	1	1
mmu-miR-467a-5p	1	1	1	1	1	1	1	1	1	1
mmu-miR-467a-5p	1	1	1	1	1	1	1	1	1	1
mmu-miR-467a-5p	1	1	1	1	1	1	1	1	1	1
mmu-miR-467a-5p	1	1	1	1	1	1	1	1	1	1
mmu-miR-467b-3p	1	1	1	1	1	1	1	1	1	1
mmu-miR-467b-5p	1	1	1	1	1	1	1	1	1	1
mmu-miR-467c-3p	1	1	1	1	1	1	1	1	1	1
mmu-miR-467c-5p	27.621	53.1481	8.94599	37.5375	91.8779	11.4282	66.7146	54.7081	36.2216	52.3782
mmu-miR-467d-3p	1	1	1	1	1	1	1	1	1	1
mmu-miR-467d-5p	33.1452	44.14	1.491	20.8542	62.901	8.57113	58.9313	41.0311	40.3222	43.9301
mmu-miR-467e-3p	1	1	1	1	1	1	1	1	1	1
mmu-miR-467e-5p	58.9248	84.6767	2.2365	49.2158	93.2914	14.2852	106.743	90.2684	52.6239	65.0503
mmu-miR-467f	1	1	1	1	1	1	1	1	1	1
mmu-miR-467g	1	1	1	1	1	1	1	1	1	1
mmu-miR-467h	1	1	1	1	1	1	1	1	1	1
mmu-miR-468-3p	1	1	1	1	1	1	1	1	1	1
mmu-miR-468-5p	1	1	1	1	1	1	1	1	1	1
mmu-miR-470-3p	1	1	1	1	1	1	1	1	1	1
mmu-miR-470-5p	1	1	1	1	1	1	1	1	1	1.68962
mmu-miR-471-3p	1	1	1	1	1	1	1	1	1	1
mmu-miR-471-5p	1	1	1	1	1	1	1	1	1	1
mmu-miR-483-3p	1	1	1	1.66833	1	1	1	1	1	1
mmu-miR-483-5p	1	1	1	1	1.41351	1	2.22382	1.8236	3.41714	1.68962
mmu-miR-484	1613.07	2611.47	579.998	1818.48	4673.76	1563.76	4690.04	4460.54	3611.91	5085.75
mmu-miR-485-3p	154.677	332.401	126.735	206.039	455.149	116.186	340.245	347.397	316.427	323.562
mmu-miR-485-5p	1921.5	4428.41	6057.18	3998.16	4768.46	3516.07	3045.52	3579.73	3087.72	3854.02
mmu-miR-486-3p	34.9866	36.0326	210.976	89.2558	70.6753	32.3798	38.9169	67.4734	57.4079	42.2405
mmu-miR-486-5p	829.55	2240.33	2431.82	1346.34	1842.51	1137.1	1597.82	2070.7	1633.39	1917.72
mmu-miR-487b-3p	1389.34	1913.33	436.117	1265.43	3538.01	618.074	3175.62	2533.9	2465.81	2553.86
mmu-miR-487b-5p	5.5242	4.50408	1.491	6.67333	18.3756	4.76174	10.0072	8.20622	8.88455	13.5169
mmu-miR-488-3p	1389.34	1318.8	565.088	1976.14	2952.81	1241.86	3026.62	2911.39	2808.2	2618.06
mmu-miR-488-5p	18.414	22.5204	29.82	28.3617	40.9917	10.4758	23.3501	28.2659	34.8548	22.8098
mmu-miR-489-3p	1	1	1	1	1	1	1	1	1.36685	1
mmu-miR-489-5p	1	1	1	1	1	1	1	1	1	1
mmu-miR-490-3p	467.715	513.465	874.47	1237.07	1673.59	731.403	1963.63	1553.71	1208.3	1501.23
mmu-miR-490-5p	10.1277	10.8098	9.69149	5.005	6.36078	1.9047	21.1263	10.9416	12.3017	13.5169
mmu-miR-491-3p	2.7621	7.20653	1	5.83916	9.89454	2.85704	5.55955	4.55901	6.83427	2.53443
mmu-miR-491-5p	39.5901	33.3302	7.45499	17.5175	43.1119	2.85704	66.7146	37.3839	33.4879	37.1716
mmu-miR-493-3p	8.28629	18.9171	8.20049	27.5275	32.5106	16.1899	32.2454	29.1777	30.7542	30.4131
mmu-miR-493-5p	245.827	464.821	250.488	231.064	457.269	179.994	424.75	530.669	408.006	328.631
mmu-miR-494-3p	135.343	72.9661	8.20049	40.04	100.359	22.8564	92.2886	108.504	90.2124	88.705
mmu-miR-494-5p	1	1	1	1	1	1	1.11191	1	1	1
mmu-miR-495-3p	3506.02	6151.67	515.14	2635.13	10729.9	1680.89	5999.87	4379.39	3784.14	5795.39
mmu-miR-495-5p	1	1	1	6.67333	2.82701	1	2.22382	3.64721	1	1.68962
mmu-miR-496-3p	29.4624	33.3302	2.2365	25.8592	65.728	12.3805	73.3861	44.6783	46.473	45.6197
mmu-miR-496-5p	1	1	1	2.5025	2.82701	1	1	2.73541	2.73371	3.37924
mmu-miR-497-3p	1	1	1	1	1.41351	1	1	1	1	1
mmu-miR-497-5p	92.0699	58.553	40.257	112.612	179.515	33.3322	276.866	208.803	157.872	239.081
mmu-miR-499-3p	1	1	1	1	1	1	1	1	1	1
mmu-miR-499-5p	103.118	96.3873	16.401	104.271	220.507	37.1416	187.913	155.918	123.017	173.186
mmu-miR-500-3p	29.4624	38.7351	12.6735	40.8741	79.8631	19.9993	60.0432	53.7963	57.4079	69.2744
mmu-miR-500-5p	1	1	1	1	1.41351	1	3.33573	1.8236	2.05028	4.22405
mmu-miR-501-3p	722.749	1214.3	1394.08	971.803	1578.89	778.068	1315.39	1481.68	1278.69	1163.3
mmu-miR-501-5p	10.1277	6.30571	5.96399	11.6783	19.0823	2.85704	8.89529	20.0597	14.352	15.2066
mmu-miR-503-3p	9.207	32.4294	8.94599	10.8442	24.0296	1	41.1407	46.5019	15.0354	21.1202
mmu-miR-503-5p	44.1936	60.3547	51.4394	96.7633	120.148	35.2369	132.317	104.857	127.801	92.929
mmu-miR-504-3p	1	2.70245	1	1	4.94727	1	3.33573	4.55901	5.46742	1
mmu-miR-504-5p	30.3831	27.9253	24.6015	20.8542	52.2997	6.66644	48.9241	67.4734	47.1565	33.7924
mmu-miR-5046	1	1	1	1	1	1	1	1	1	1
mmu-miR-505-3p	6.4449	20.7188	1.491	10.8442	22.6161	8.57113	22.2382	20.0597	19.136	25.3443
mmu-miR-505-5p	34.9866	144.131	95.4239	55.055	121.562	47.6174	112.303	99.3865	115.499	104.756
mmu-miR-509-3p	1	1	1	1	1	1	1	1	1	1
mmu-miR-509-5p	1	1	1	1	1	1	1	1	1	1
mmu-miR-5097	1	1	1	1	1	1	1	1	1	1
mmu-miR-5098	1	1	1	1	1	1	1	1	1	1
mmu-miR-5099	2.7621	6.30571	10.437	7.5075	4.24052	8.57113	5.55955	4.55901	4.10056	5.91367
mmu-miR-5100	3.6828	10.8098	2.982	5.83916	19.0823	3.80939	4.44764	3.64721	6.83427	11.8273
mmu-miR-5101	1	1	1	1	1	1	1	1	1	1
mmu-miR-5102	1	1	1	1	1	1	1	1	1	1
mmu-miR-5103	1	2.70245	1	1	1	1	3.33573	2.73541	1	1
mmu-miR-5104	1	1	1	1	1	1	1	1	1	1
mmu-miR-5105	5.5242	2.70245	2.2365	3.33666	2.82701	2.85704	2.22382	2.73541	4.78399	1
mmu-miR-5106	5.5242	1	3.7275	2.5025	6.36078	2.85704	5.55955	5.47081	2.05028	1.68962
mmu-miR-5107	1	1	1	1	1	1	1	1	1	1
mmu-miR-5108	1	1	1	1	1	1	1	1	1	1
mmu-miR-5109	11.9691	18.9171	44.7299	28.3617	26.1499	23.8087	14.4548	32.8249	45.7896	19.4306
mmu-miR-5110	1	1	1	1	1	1	1	1	1	1
mmu-miR-5111-3p	1	1	1	1	1	1	1	1	1	1
mmu-miR-5111-5p	1	1	1	1	1	1	1	1	1	1
mmu-miR-5112	1	1	1	1	1	1	1	1	1	1
mmu-miR-5113	1	1	1	1	1	1	1	1	1	1
mmu-miR-511-3p	1	1	1	1	1	1	1	1	1	1
mmu-miR-5114	1	1	1	1	1	1	4.44764	2.73541	1	1
mmu-miR-5115	1	1	1	1	1	1	1	1	1	1
mmu-miR-511-5p	1	1	1	1	1	1	1	1	1	1
mmu-miR-5116	1	1	1	1	1	1	1	1	1	1
mmu-miR-5117-3p	6.4449	1.80163	4.47299	15.015	3.53376	1.9047	2.22382	4.55901	4.78399	2.53443
mmu-miR-5117-5p	1101.16	916.13	155.809	1491.49	337.121	73.3308	1705.67	1345.82	828.314	979.134
mmu-miR-5118	1	1	1	1	1	1	1	1	1	1
mmu-miR-5119	1	1	2.2365	1	1.41351	1	1	1	1	1
mmu-miR-5120	1	1	1	1	1	1	1	1	1	1
mmu-miR-5121	9.207	8.10734	6.70949	66.7333	4.24052	1	25.5739	28.2659	43.7393	5.06886
mmu-miR-5122	1	1	1	1	1	1	1	1	1	1
mmu-miR-5123	1	1	1	1	1	1	1	1	1	1
mmu-miR-5124	1	1	1	1	1	1	1	1	1	1
mmu-miR-5125	1	1	1	1	1	1	1	1	1	1
mmu-miR-5126	1	1	1	1	1	1	1	1	1	1
mmu-miR-5127	1	1	1	1	1	1	1	1	1	1
mmu-miR-5128	1	1	3.7275	1	1	1	1	1	1	1
mmu-miR-5129	3.6828	1	2.982	1.66833	1.41351	1	1	1.8236	1.36685	2.53443
mmu-miR-5130	1	1	1	1	1	1	1	1	1	1
mmu-miR-5131	1	1	1	1	1	1	1	1	1	1
mmu-miR-5132	1	1	2.982	1	1	1	1	1	1	3.37924
mmu-miR-5133	1	1	1	1	1	1	1	1	1	1
mmu-miR-5134	1	1	1.491	1	1	1	3.33573	3.64721	1	1.68962
mmu-miR-5135	1	1	1	1	1	1	1	1	1	1
mmu-miR-5136	1	1	1	1	1	1	1	1	1	1
mmu-miR-532-3p	79.1802	135.122	19.383	77.5775	179.515	50.4745	182.353	144.065	138.736	130.945
mmu-miR-532-5p	3109.2	5347.24	6872.01	7674.33	11187.9	8085.44	7036.17	7957.3	7290.8	8464.15
mmu-miR-539-3p	6.4449	1.80163	1.491	8.34166	17.6688	1.9047	16.6787	4.55901	11.6183	9.2929
mmu-miR-539-5p	46.9557	65.7596	25.347	21.6883	80.5698	13.3329	98.96	98.4747	60.825	80.2569
mmu-miR-540-3p	473.24	1117.01	552.415	676.509	1267.21	510.459	1404.34	1190.81	1111.25	838.051
mmu-miR-540-5p	49.7178	17.1155	40.257	176.843	199.304	104.758	153.444	105.769	180.425	178.255
mmu-miR-541-3p	36.828	21.6196	6.70949	23.3567	62.901	17.1423	52.2598	44.6783	52.6239	56.6022
mmu-miR-541-5p	16643.5	38473	33203	31856.8	49042.3	26754.3	36798.7	45757.9	34060	34230
mmu-miR-542-3p	68.1318	42.3384	39.5114	86.7533	87.6374	32.3798	107.855	117.623	92.9461	68.4296
mmu-miR-542-5p	1	1	1	1	1	1	3.33573	1.8236	1.36685	1
mmu-miR-543-3p	7167.64	23596.9	5422.76	12547.5	30545.9	9842.52	14967.4	14815.9	13825.7	20005.9
mmu-miR-543-5p	21.1761	19.818	2.2365	9.17583	28.2701	4.76174	18.9025	11.8534	10.9348	20.2754
mmu-miR-544-3p	23.0175	14.4131	5.96399	27.5275	55.8335	14.2852	70.0504	37.3839	56.7245	54.0678
mmu-miR-544-5p	1.8414	3.60326	1	3.33666	3.53376	1	4.44764	2.73541	4.78399	1
mmu-miR-546	1	1	1	1	1	1	1	1	1	1
mmu-miR-547-3p	23.9382	14.4131	3.7275	16.6833	22.6161	1	22.2382	35.5603	29.3874	18.5858
mmu-miR-547-5p	1	1	1	1	1	1	1	1	1	1
mmu-miR-551b-3p	46.035	30.6277	9.69149	64.2308	108.84	30.4751	166.787	113.975	125.751	72.6536
mmu-miR-551b-5p	4.6035	1.80163	1	3.33666	4.24052	1	10.0072	7.29442	4.78399	7.60328
mmu-miR-5615-3p	1.8414	1	1	1	1	1	1	1	1	1
mmu-miR-5615-3p	1.8414	1	1	1	1	1	1	1	1	1
mmu-miR-5615-5p	1	1.80163	1	1.66833	1.41351	1	1.11191	1	2.73371	1.68962
mmu-miR-5615-5p	2.7621	2.70245	2.982	8.34166	10.6013	1.9047	5.55955	7.29442	4.78399	5.91367
mmu-miR-5616-3p	1	1	1	1	1	1	1	1	1	1
mmu-miR-5616-5p	1	1	1	1	1	1	1	1	1	1
mmu-miR-5617-3p	4.6035	4.50408	5.96399	5.005	12.0148	4.76174	7.78337	7.29442	11.6183	6.75847
mmu-miR-5617-5p	3.6828	1	2.2365	1.66833	5.65402	1.9047	4.44764	4.55901	4.78399	4.22405
mmu-miR-5618-3p	1	1	1	1	1	1	1	1	1	1
mmu-miR-5618-5p	1	1	1	1	1	1	1	1	1	1
mmu-miR-5619-3p	1	1	1	1	1	1	1	1	1	1
mmu-miR-5619-5p	1	1	1	1	1	1	1	1	1	1
mmu-miR-5620-3p	1	1	1	1	1	1	1	1	1	1
mmu-miR-5620-5p	1.8414	2.70245	1	1.66833	3.53376	1	3.33573	1	2.73371	3.37924
mmu-miR-5621-3p	9.207	20.7188	11.1825	20.8542	27.5634	14.2852	23.3501	23.7069	19.136	17.741
mmu-miR-5621-5p	1	1	1.491	1	1	1	2.22382	1	1	1
mmu-miR-5622-3p	1	1	1	1	1	1	1	1	1	1
mmu-miR-5622-5p	1	1	1	1	1	1	1	1	1	1
mmu-miR-5623-3p	1	1	1	1	1	1	1	1	1	1
mmu-miR-5623-5p	1	1.80163	1	1	1	1	1.11191	1	1	1
mmu-miR-5624-3p	1	1	1	1	1	1	1	1	1	1
mmu-miR-5624-5p	1	1	1	1.66833	1	1	1	1	1	1
mmu-miR-5625-3p	1	1	1	1	1	1	1	1	1	1
mmu-miR-5625-5p	1	1	1	1	1	1	1	1	1	1
mmu-miR-5626-3p	1	1	1	1	1	1	1	1	1	1
mmu-miR-5626-5p	1	1	1	1	1	1	1.11191	1	1	1
mmu-miR-5627-3p	1	1	1	1	1	1.9047	1	1.8236	1	1
mmu-miR-5627-5p	1	1	1	1	1	1	1	1	1	1
mmu-miR-568	1	1	1	1	1	1	1	1	1	1
mmu-miR-5709	1	1.80163	1	1	1	1	1.11191	1.8236	2.05028	2.53443
mmu-miR-5710	1	1.80163	1	4.17083	1	3.80939	1.11191	3.64721	1	1
mmu-miR-574-3p	81.9422	112.602	27.5835	79.2458	130.043	38.0939	163.451	158.654	121.65	125.877
mmu-miR-574-5p	1	1	1	1	1	1	1	1	1	1
mmu-miR-582-3p	94.832	77.4702	109.588	210.21	283.408	118.091	210.151	237.98	202.978	143.618
mmu-miR-582-5p	23.0175	13.5122	1	33.3667	60.074	8.57113	53.3717	32.8249	29.3874	29.5683
mmu-miR-592-3p	1	1	1	1	1	1	2.22382	1	1.36685	1
mmu-miR-592-5p	21.1761	20.7188	1.491	10.8442	33.9241	1.9047	47.8122	19.1478	25.9702	26.1891
mmu-miR-598-3p	3213.24	5906.65	4615.39	7102.93	14225.5	7344.51	10569.8	11105.7	9804.45	11131.2
mmu-miR-598-5p	1	1.80163	1	1	1	1	5.55955	1.8236	2.05028	1
mmu-miR-599	1	1	1	1	1	1	1	1	1	1
mmu-miR-615-3p	1	6.30571	2.2365	1	1.41351	1.9047	5.55955	3.64721	4.10056	1.68962
mmu-miR-615-5p	1	1	1	1	1	1	1	1	1	1
mmu-miR-652-3p	1087.35	1928.65	464.446	1356.35	3142.22	746.641	2615.22	1881.05	1776.23	2234.52
mmu-miR-652-5p	1.8414	5.4049	1	1.66833	5.65402	1	2.22382	5.47081	6.15085	2.53443
mmu-miR-653-3p	1	1	1	1	1.41351	1	4.44764	1.8236	1	1
mmu-miR-653-5p	1	1	1	1	1	1	1	1	1	1
mmu-miR-654-3p	1	1	1	1	1	1	1	1	1	1
mmu-miR-654-5p	1	1	1	1	1	1	1	1	1	1
mmu-miR-664-3p	643.569	709.843	160.282	360.36	1091.93	263.801	1097.46	1054.04	768.856	700.347
mmu-miR-664-5p	152.836	234.212	590.435	251.084	271.393	179.994	262.411	328.249	227.581	201.909
mmu-miR-665-3p	69.0525	65.7596	26.838	132.632	145.591	58.0932	242.396	141.329	177.691	142.773
mmu-miR-665-5p	1	1	1	1	1	1	1	1	1	1
mmu-miR-666-3p	24.8589	71.1645	23.856	58.3916	116.614	37.1416	105.632	78.415	61.5085	110.67
mmu-miR-666-5p	331.452	870.188	1081.72	583.082	1036.81	421.89	1116.36	936.421	891.189	872.688
mmu-miR-667-3p	534.926	785.512	200.539	493.826	1098.29	279.038	783.897	751.325	738.785	786.517
mmu-miR-667-5p	104.039	295.468	764.882	266.099	405.676	226.659	469.226	443.136	333.513	255.977
mmu-miR-668-3p	985.149	2729.47	921.437	1949.45	4180.45	1698.04	2717.51	2772.79	2366.71	3323.48
mmu-miR-668-5p	6.4449	32.4294	8.20049	21.6883	45.2322	11.4282	14.4548	14.5888	15.0354	24.4995
mmu-miR-669a-3-3p	1	1	1	1	1	1	1	1	1	1
mmu-miR-669a-3p	1	1	1	1	1	1	1	1	1	1
mmu-miR-669a-3p	1	1	1	1	1	1	1	1	1	1
mmu-miR-669a-3p	1	1	1	1	1	1	1	1	1	1
mmu-miR-669a-3p	1	1	1	1	1	1	1	1	1	1
mmu-miR-669a-3p	1	1	1	1	1	1	1	1	1	1
mmu-miR-669a-3p	1	1	1	1	1	1	1	1	1	1
mmu-miR-669a-3p	1	1	1	1	1	1	1	1	1	1
mmu-miR-669a-3p	1	1	1	1	1	1	1	1	1	1
mmu-miR-669a-3p	1	1	1	1	1	1	1	1	1	1
mmu-miR-669a-3p	1	1	1	1	1	1	1	1	1	1
mmu-miR-669a-3p	1	1	1	1	1	1	1	1	1	1
mmu-miR-669a-5p	1	1	1	1	1	1	1	1	1	1
mmu-miR-669a-5p	1	1	1	1	1	1	1	1	1	1
mmu-miR-669a-5p	1	1	1	1	1	1	1	1	1	1
mmu-miR-669a-5p	1	1	1	1	1	1	1	1	1	1
mmu-miR-669a-5p	1	1	1	1	1	1	1	1	1	1
mmu-miR-669a-5p	1	1	1	1	1	1	1	1	1	1
mmu-miR-669a-5p	1	1	1	1	1	1	1	1	1	1
mmu-miR-669a-5p	1	1	1	1	1	1	1	1	1	1
mmu-miR-669a-5p	1	1	1	1	1	1	1	1	1	1
mmu-miR-669a-5p	1	1	1	1	1	1	1	1	1	1
mmu-miR-669a-5p	1	1	1	1	1	1	1	1	1	1
mmu-miR-669a-5p	1	1	1	1	1	1	1	1	1	1
mmu-miR-669b-3p	1	1	1	1	1	1	1	1	1	1
mmu-miR-669b-5p	2.7621	8.10734	1	1.66833	9.89454	1	11.1191	10.0298	7.5177	14.3618
mmu-miR-669c-3p	1	1	1	1	1	1	1	1	1	1
mmu-miR-669c-5p	514.671	1071.07	1015.37	1056.89	1182.4	618.074	520.374	791.445	807.811	734.139
mmu-miR-669d-2-3p	1	1	1	1	1	1	1	1	1	1
mmu-miR-669d-3p	1	1	1	1	1	1	1	1	1	1
mmu-miR-669d-5p	6.4449	3.60326	1	3.33666	12.0148	1	11.1191	5.47081	10.9348	11.8273
mmu-miR-669d-5p	7.3656	3.60326	1	4.17083	14.1351	1	12.231	5.47081	10.2514	14.3618
mmu-miR-669e-3p	1	1	1	1	1	1	1	1	1	1
mmu-miR-669e-5p	8.28629	8.10734	1	9.17583	14.1351	1.9047	11.1191	10.0298	15.7188	14.3618
mmu-miR-669f-3p	1	1	1	1	1	1	1	1	1	1
mmu-miR-669f-5p	3.6828	3.60326	1	5.005	3.53376	1	7.78337	5.47081	2.05028	3.37924
mmu-miR-669g	1	1	1	1	1	1	1	1	1	1
mmu-miR-669h-3p	1	1	1	1	1	1	1	1	1	1
mmu-miR-669h-5p	12.8898	36.9335	17.1465	7.5075	28.9769	1.9047	28.9097	22.7951	21.8697	16.0514
mmu-miR-669i	1	1	1	1	1	1	1	1	1	1
mmu-miR-669j	1	1	1	1	1	1	1	1	1	1
mmu-miR-669k-3p	1	1	1	1	1	1	1	1	1	1
mmu-miR-669k-5p	1	1	1	1	1	1	1	1	1	1
mmu-miR-669l-3p	1	1	1	1	1	1	1	1	1	1
mmu-miR-669l-5p	6.4449	10.8098	1	8.34166	13.4283	6.66644	13.3429	8.20622	9.56798	13.5169
mmu-miR-669m-3p	1	1	1	1	1	1	1	1	1	1
mmu-miR-669m-3p	1	1	1	1	1	1	1	1	1	1
mmu-miR-669m-5p	1	1	1	1	1	1	1	1	1	1
mmu-miR-669m-5p	1	1	1	1	1	1	1	1	1	1
mmu-miR-669n	1	1	1	1	1	1	1	1	1	1
mmu-miR-669o-3p	1	1	1	1	1	1	1	1	1	1
mmu-miR-669o-5p	8.28629	3.60326	1	1	3.53376	3.80939	3.33573	3.64721	1.36685	5.06886
mmu-miR-669p-3p	1	1	1	1	1	1	1	1	1	1
mmu-miR-669p-3p	1	1	1	1	1	1	1	1	1	1
mmu-miR-669p-5p	1	1	1	1	1	1	1	1	1	1
mmu-miR-669p-5p	1	1	1	1	1	1	1	1	1	1
mmu-miR-670-3p	4.6035	1.80163	1	9.17583	16.2553	1	12.231	6.38262	12.3017	11.8273
mmu-miR-670-5p	5.5242	2.70245	2.982	5.005	7.77428	1	8.89529	8.20622	9.56798	5.06886
mmu-miR-671-3p	488.892	879.197	1452.98	942.608	1376.05	1283.77	1129.7	1552.8	1045.64	1274.82
mmu-miR-671-5p	183.219	174.758	58.1489	191.858	339.242	79.0449	394.728	372.927	356.066	310.89
mmu-miR-672-3p	16.5726	22.5204	3.7275	8.34166	14.8418	8.57113	40.0288	29.1777	19.8194	31.2579
mmu-miR-672-5p	280.813	769.297	843.905	613.112	828.315	591.408	572.634	732.177	676.593	696.123
mmu-miR-673-3p	96.6735	308.98	273.598	256.089	462.923	269.515	313.559	363.809	259.019	294.838
mmu-miR-673-5p	185.061	435.094	290.745	346.179	539.253	258.086	428.086	476.873	382.719	410.577
mmu-miR-674-3p	2436.17	4221.22	5192.4	6534.86	6588.35	7489.26	6038.79	6945.2	5388.82	6017.58
mmu-miR-674-5p	350.787	601.745	134.935	201.868	590.845	146.662	861.731	732.177	541.958	669.934
mmu-miR-675-3p	1	1	1	1	1	1	1	1	1	1
mmu-miR-675-5p	1	1	1	1	1	1	1	1	1	1
mmu-miR-676-3p	1907.69	6103.03	3845.28	3049.71	4849.04	2018.03	3685.98	3657.24	3843.59	3799.11
mmu-miR-676-5p	250.43	579.225	732.08	869.201	1090.52	643.787	918.438	912.715	906.225	684.296
mmu-miR-677-3p	1	1	1	1	1	1	1	1	1	1
mmu-miR-677-5p	21.1761	9.90898	43.2389	29.1958	35.3376	18.0946	46.7002	40.1193	42.3725	43.9301
mmu-miR-678	1	1	1	1	1	1	1	1	1	1
mmu-miR-679-3p	2.7621	5.4049	1	1.66833	10.6013	1	2.22382	2.73541	3.41714	2.53443
mmu-miR-679-5p	1	1.80163	2.2365	1.66833	2.12026	1.9047	5.55955	3.64721	1	3.37924
mmu-miR-680	1	1	1	1	1	1	1	1	1	1
mmu-miR-680	1	1	1	1	1	1	1	1	1	1
mmu-miR-680	1	1	1	1	1	1	1	1	1	1
mmu-miR-681	1	1	1	1	1	1	1	1	1	1
mmu-miR-682	1	1	1	1	1	1	1	1	1	1
mmu-miR-683	1	1	1	1	1	1	1	1	1	1
mmu-miR-683	1	1	1	1	1	1	1	1	1	1
mmu-miR-684	1	1	1	1	1	1	1	1	1	1
mmu-miR-684	1	1	1	1	1	1	1	1	1	1
mmu-miR-686	1	1	1	1	1	1	1	1	1	1
mmu-miR-687	1	1	1	1	1	1	1	1	1	1
mmu-miR-688	1	1	1	1	1	1	2.22382	1	1	1
mmu-miR-690	1	1	1	1	1	1	1	1	1	1
mmu-miR-691	1	1	1	1	1	1	1	1	1	1
mmu-miR-692	1	1	1	1	1	1	1	1	1	1
mmu-miR-692	1	1	1	1	1	1	1	1	1	1
mmu-miR-692	1	1	1	1	1	1	1	1	1	1
mmu-miR-693-3p	1	1	1	1	1	1	1	1	1	1
mmu-miR-693-5p	1	1	1	1	1	1	1	1	1	1
mmu-miR-694	1	1	1	1.66833	1.41351	1	1.11191	1	1	1.68962
mmu-miR-695	1	1	1	1	1	1	1	1	1	1
mmu-miR-697	1	1	1	1	1	1	1	1	1	1
mmu-miR-698	1	1	1	1	1	1	1.11191	1	1	1
mmu-miR-700-3p	275.289	264.84	131.953	362.028	872.133	374.273	637.125	688.411	686.161	731.605
mmu-miR-700-5p	36.828	58.553	12.6735	65.065	147.711	89.5207	100.072	118.534	96.3632	111.515
mmu-miR-701-3p	1	1	1	1	1	1	1	1	1	1
mmu-miR-701-5p	1	4.50408	1	7.5075	7.77428	1.9047	10.0072	8.20622	3.41714	5.91367
mmu-miR-702	127.977	326.096	116.298	155.989	338.535	83.8067	241.285	192.39	221.43	201.065
mmu-miR-703	1	1	1	1	1	1	1	1	1	1
mmu-miR-704	22.0968	37.8343	52.1849	17.5175	45.939	20.9517	48.9241	51.0609	25.2868	45.6197
mmu-miR-705	1	1	1	1	1	1	1	1	1	1
mmu-miR-706	1	1	1	1	1	1	1	1	1	1
mmu-miR-707	1	1	1	1	1	1	1	1	1	1
mmu-miR-708-3p	3789.6	5096.82	5811.17	7165.49	12698.2	7904.49	10389.7	11649.2	8430.76	9047.06
mmu-miR-708-5p	1940.83	2191.69	331.002	2022.02	3261.67	839.019	4118.52	3441.14	2736.44	3442.6
mmu-miR-709	1	1	1	1	1	1	1	1	1	1
mmu-miR-710	1	1	1	1	1	1	1	1	1	1
mmu-miR-711	1	1	1	1	1	1	1	1	1	1
mmu-miR-713	1	1	1	1	1	1	1	1	1	1
mmu-miR-717	1	1	1	1	1	1	1	1	1	1
mmu-miR-718	1	1	1	1	1	1	1	1	1	1
mmu-miR-719	1	1	1	1	1	1	1	1	1	1
mmu-miR-720	1	1	1	1	1.41351	1	2.22382	1	1	1
mmu-miR-721	1	1	1	1	1	1	1	1	1	1
mmu-miR-741-3p	1	1	1	1	1	1	1	1	1	1
mmu-miR-741-5p	1	1	1	1	1	1	1	1	1	1
mmu-miR-742-3p	1	1	1	1	1	1	1	1	1	1
mmu-miR-742-5p	1	1	1	1	1	1	1	1	1	1
mmu-miR-743a-3p	1	1	1	1	1	1	1	1	1	1
mmu-miR-743a-5p	1	1	1	1	1	1	1	1	1	1
mmu-miR-743b-3p	1	1	1	1	1	1	1	1	1	1
mmu-miR-743b-5p	1	1	1	1	1	1	1	1	1	1
mmu-miR-744-3p	32.2245	11.7106	10.437	47.5475	71.3821	25.7134	77.8338	44.6783	53.3073	48.1541
mmu-miR-744-5p	9838.59	17932.5	40198.1	26518.1	32367.2	20816.4	34396.9	31075.1	30019.5	25607
mmu-miR-758-3p	79.1802	202.684	64.8584	296.963	433.946	135.233	290.209	226.127	306.175	304.131
mmu-miR-758-5p	1	1	1	1	1	1	1.11191	1	1	1
mmu-miR-759	1	1	1	1	1	1	1	1	1	1
mmu-miR-760-3p	627.917	2058.36	2629.37	1376.37	2631.95	1175.2	1932.5	1850.05	1828.85	1738.62
mmu-miR-760-5p	1.8414	1	1	5.005	7.77428	3.80939	7.78337	10.9416	6.83427	5.06886
mmu-miR-761	1	1	1	1	1	1	1	1	1	1
mmu-miR-762	1	1	1	1	1	1	1	1	1	1
mmu-miR-763	1	1	1	1	1	1	1	1	1	1
mmu-miR-764-3p	1.8414	1	1	1	2.82701	1	1	1	2.05028	2.53443
mmu-miR-764-5p	42.3522	72.0653	11.928	92.5924	113.08	37.1416	102.296	59.2671	86.7952	77.7225
mmu-miR-767	1	1	1	1	1	1	1	1	1	1
mmu-miR-770-3p	2832.07	8921.68	9776.47	6439.76	12178.1	5117.92	8570.61	7445.77	6903.3	7317.74
mmu-miR-770-5p	1733.68	4917.55	2265.57	3009.67	4690.72	1258.05	4311.99	3352.7	4772.37	3560.03
mmu-miR-7a-1-3p	69.9732	81.9743	3.7275	44.2108	122.268	10.4758	143.436	131.3	76.5438	94.6186
mmu-miR-7a-2-3p	169.409	479.234	133.444	206.039	450.908	50.4745	605.992	422.165	380.669	331.165
mmu-miR-7a-5p	82577.6	173703	65007.5	107935	295522	59718.9	210709	191199	155773	139726
mmu-miR-7a-5p	59200.1	123414	48652.8	81361.2	215316	48811.7	152892	142915	115689	103362
mmu-miR-7b-3p	21.1761	14.4131	7.45499	19.1858	24.7364	13.3329	32.2454	31.0013	17.0857	31.2579
mmu-miR-7b-5p	24826.7	37891	17807	26046	68119.7	15200.4	50500.8	48659.2	37397.8	37101.5
mmu-miR-802-3p	1	1	1	1	1	1	1	1	1.36685	1
mmu-miR-802-5p	1	1	1	1	2.12026	1	1	1	1	1
mmu-miR-804	1	1	1	1	1	1	1	1	1	1
mmu-miR-871-3p	3.6828	1.80163	1	1	1.41351	1	1	1	1.36685	1.68962
mmu-miR-871-5p	1	1	1	1	1	1	1	1	1	1
mmu-miR-872-3p	482.447	590.936	238.56	739.071	1408.56	391.415	1548.89	1165.28	1121.5	1090.65
mmu-miR-872-5p	2649.77	3781.62	849.869	4219.21	5779.82	1493.28	6212.24	5851.03	4329.51	4959.87
mmu-miR-873-3p	592.01	931.444	612.8	641.474	901.816	419.986	985.152	1458.88	1083.23	1025.6
mmu-miR-873-5p	216.364	260.336	319.819	572.238	683.43	660.93	646.02	640.086	793.459	576.16
mmu-miR-874-3p	671.19	977.386	292.981	1298.8	1737.2	556.171	1642.29	1237.32	1398.98	1318.75
mmu-miR-874-5p	1	7.20653	1	11.6783	9.18779	1.9047	17.7906	4.55901	9.56798	6.75847
mmu-miR-875-3p	1	1	1	1	1	1	1	1	1	1
mmu-miR-875-5p	1	1	1	1	1	1	1	1	1	1
mmu-miR-876-3p	1	1	1	1	1	1	1	1	1	1
mmu-miR-876-5p	4.6035	1.80163	1	8.34166	9.89454	8.57113	14.4548	16.4124	19.136	16.0514
mmu-miR-877-3p	206.237	467.524	204.267	311.978	542.786	196.184	396.952	405.752	368.368	525.471
mmu-miR-877-5p	74.5766	99.0898	84.9869	82.5825	124.389	52.3792	148.996	144.977	151.037	95.4635
mmu-miR-878-3p	1	1	1	1	1	1	1	1	1	1
mmu-miR-878-5p	1	1	1	1	1	1	1	1	1	2.53443
mmu-miR-879-3p	1	1	1	2.5025	1.41351	1	1.11191	1	1	4.22405
mmu-miR-879-5p	128.898	80.1726	166.992	626.459	416.984	400.939	522.598	393.898	505.736	411.422
mmu-miR-880-3p	1	1	1	1	2.12026	1	1.11191	1	1	1
mmu-miR-880-5p	1	1	1	1	1	1	1	1	1	1
mmu-miR-881-3p	3.6828	1	1	1	4.24052	1.9047	1	6.38262	1	2.53443
mmu-miR-881-5p	1	1	1	1	1	1	1	1	1	1
mmu-miR-882	1	1	1	1	1	1	1	1	1	1
mmu-miR-883a-3p	1	1	1	1	1	1	1	1	1.36685	1
mmu-miR-883a-5p	1	1	1	1	1	1	1	1	1	1
mmu-miR-883b-3p	1	1	1	1	1	1	1	1	1	1
mmu-miR-883b-5p	1	1	1	1	1	1	1	1	1	1
mmu-miR-92a-1-5p	1.8414	1	1	1	1	1	1.11191	1.8236	2.73371	2.53443
mmu-miR-92a-2-5p	1	1	1	1	1	1	1	1	1	1
mmu-miR-92a-3p	1436.29	2371.85	2913.41	1924.42	3153.53	1746.61	2981.03	4103.11	2803.42	2903.61
mmu-miR-92a-3p	1073.54	1766.5	2062.05	1255.42	2299.77	1197.1	2048.14	2824.76	2099.49	2029.23
mmu-miR-92b-3p	3393.7	8942.4	9499.15	5718.21	9613.96	5329.34	7447.58	8379.46	7888.8	7653.97
mmu-miR-92b-5p	68.1318	293.666	777.556	313.646	490.487	428.557	320.23	310.925	304.809	326.941
mmu-miR-93-3p	6.4449	40.5367	8.94599	21.6883	45.939	8.57113	58.9313	42.8547	30.0708	43.9301
mmu-miR-93-5p	797.326	721.554	318.328	1041.04	1578.18	466.651	1552.23	1749.75	1243.84	1546.85
mmu-miR-9-3p	5793.96	4282.48	553.16	5100.93	8388.45	1482.81	7844.53	7650.02	4516.09	7605.82
mmu-miR-9-3p	5725.83	4266.27	552.415	5083.41	8360.18	1481.85	7802.28	7597.14	4495.59	7565.27
mmu-miR-9-3p	22437.4	13030.3	1449.25	10903.4	23541.2	3412.26	25006.9	24290.4	14089.5	22918.8
mmu-miR-9-5p	764289	657873	734404	1.00035e+06	1.41806e+06	618637	1.97222e+06	2.33654e+06	1.25575e+06	1.22736e+06
mmu-miR-9-5p	764541	658116	734656	1.00051e+06	1.41872e+06	619159	1.97268e+06	2.33736e+06	1.25627e+06	1.2279e+06
mmu-miR-9-5p	764476	658067	734516	1.00035e+06	1.4186e+06	618977	1.97252e+06	2.33705e+06	1.25609e+06	1.22774e+06
mmu-miR-96-3p	1	1	1	1	1	1	1	1	1	1
mmu-miR-96-5p	10.1277	8.10734	30.5655	5.005	13.4283	17.1423	26.6859	101.21	37.5885	76.0329
mmu-miR-98-3p	42.3522	13.5122	8.94599	19.1858	45.2322	9.52348	50.036	51.0609	43.0559	27.0339
mmu-miR-98-5p	4688.2	6477.77	659.767	3700.36	6695.07	1362.81	5296.03	6645.21	3835.39	4561.97
mmu-miR-99a-3p	11.0484	15.3139	11.928	64.2308	60.7808	24.7611	61.1551	39.2075	64.9256	54.0678
mmu-miR-99a-5p	99656.5	168919	57867.9	185104	306093	99818.5	199811	160587	160719	187631
mmu-miR-99b-3p	312.117	553.101	738.789	656.489	971.785	757.117	1002.94	1262.85	894.606	833.827
mmu-miR-99b-5p	13117.2	27149.7	50424.8	31793.4	38526.5	37275.9	32977	42328.6	35001.7	30715.6

## Sheet: SE2
miRNA	FC-1	FC-2	FC-3	UNP-1	UNP-2	UNP-3	Naïve-1	Naïve-2	Naïve-3
mmu-let-7a-1-3p	142.555	220.846	233.262	218.393	249.678	184.392	152.508	214.973	168.919
mmu-let-7a-1-3p	142.555	220.846	233.262	218.393	249.678	184.392	152.508	214.973	168.919
mmu-let-7a-2-3p	2.91921	3.86883	3.29569	3.45286	2.99015	3.88194	4.38873	3.62059	2.09651
mmu-let-7a-5p	59352	42603.9	36338.3	46023.7	42027.6	50897.1	66469.3	57578.3	55182.2
mmu-let-7a-5p	59372	42650.3	36399.8	46077	42061.5	50956.6	66500.9	57595.5	55292.7
mmu-let-7b-3p	242.781	244.704	324.808	262.417	272.602	257.825	219.875	236.696	212.346
mmu-let-7b-5p	10135.5	7748.95	8232.63	6638.12	7715.09	8650.9	9037.49	9954.37	7708.86
mmu-let-7c-1-3p	18.9749	22.5682	27.0979	21.2926	17.4426	22.3211	14.4828	28.9647	12.2795
mmu-let-7c-2-3p	142.555	220.846	233.262	218.393	249.678	184.392	152.508	214.973	168.919
mmu-let-7c-2-3p	142.555	220.846	233.262	218.393	249.678	184.392	152.508	214.973	168.919
mmu-let-7c-5p	85972.3	50679.5	47222.1	53850.5	49527.4	62313.5	70247.6	73962.8	55682.3
mmu-let-7c-5p	85945.6	50583.1	47229.8	53764.2	49541.4	62296.1	70211.6	73976.4	55631.4
mmu-let-7d-3p	2876.4	2481.53	2239.6	2869.04	2150.92	1930.62	3241.74	2527.17	1612.51
mmu-let-7d-5p	12730.2	13595.7	12399.8	12589.1	12246.2	11763.2	13198	12587.9	17744.8
mmu-let-7e-3p	117.255	165.715	179.798	132.935	149.009	143.632	115.424	167	158.736
mmu-let-7e-5p	17487.6	16100.5	12691.7	17807.8	14287	13572.6	22320.9	16309.9	20132.8
mmu-let-7f-1-3p	35.0306	41.59	48.703	34.5286	31.3966	32.673	31.5989	43.4471	32.9451
mmu-let-7f-2-3p	114.822	168.294	211.656	152.501	174.426	131.662	125.518	153.875	156.04
mmu-let-7f-5p	170115	152745	85154.4	148889	125913	126844	177012	143404	172305
mmu-let-7f-5p	174709	157186	87407.9	152780	129326	130181	181506	147441	179008
mmu-let-7g-3p	19.4614	29.9835	33.3231	24.17	19.436	11.9693	17.3355	16.7452	26.0566
mmu-let-7g-5p	22644.3	21185.4	14339.9	19407.7	21460.8	21476.2	27955.8	26001.3	20881.5
mmu-let-7i-3p	47.194	68.027	79.8289	54.958	62.7932	39.7899	44.3262	59.7398	50.3162
mmu-let-7i-5p	25805.9	27078	17590.2	26460.4	28631.7	32015	27351.9	29605.6	38226.8
mmu-let-7j	3089.99	4142.23	2965.02	3767.07	3919.59	3897.14	4025.56	4322.08	5680.64
mmu-let-7k	3.40575	1.61201	5.49281	2.30191	3.48851	3.88194	3.94986	4.97831	2.09651
mmu-miR-100-3p	9.24418	14.1857	6.22519	12.3727	6.47867	7.76388	8.33859	8.14633	8.38603
mmu-miR-100-5p	4607.01	3238.86	3697.4	3851.66	3292.66	3715.99	3338.73	2982.92	3010.28
mmu-miR-101a-3p	13140.4	16287.8	20692.5	16549.3	16709.5	15466	13838.5	16136.1	15831
mmu-miR-101a-5p	37.9498	46.7484	52.3648	29.637	40.8654	29.7615	28.7462	37.5636	34.7421
mmu-miR-101b-3p	3319.63	4060.66	5027.76	4379.95	4204.65	4062.45	4021.39	3970.43	4028.89
mmu-miR-101b-5p	0	0	0	0.575476	0	0.64699	0	0	0.299501
mmu-miR-101c	13135.5	16281.3	20682.6	16542.6	16699.5	15459.8	13833.9	16130.2	15826.2
mmu-miR-101c	184.884	233.742	328.104	253.497	258.15	224.829	200.784	230.813	224.626
mmu-miR-103-1-5p	1.45961	0.644805	0.732375	1.15095	0.498359	0.64699	0.65831	0.452574	0
mmu-miR-103-2-5p	1.94614	0.644805	3.29569	1.72643	1.49508	0.970485	2.85268	0.452574	0.898503
mmu-miR-103-3p	9720.98	10099.3	11153	9913.73	10270.7	10212.4	10187.1	10830.1	10338.5
mmu-miR-103-3p	9740.93	10118	11189.2	9938.19	10291.1	10227.9	10210.8	10858.2	10359.4
mmu-miR-105	0	0	0	0	0	0	0	0	0
mmu-miR-106a-3p	0	0	0	0	0	0	0	0	0
mmu-miR-106a-5p	7.29804	1.61201	3.66188	3.45286	0.996718	0.970485	1.53606	1.8103	2.09651
mmu-miR-106b-3p	120.661	149.917	170.277	140.704	162.963	153.984	161.286	163.832	185.691
mmu-miR-106b-5p	64.7093	70.9286	92.6455	68.7694	75.2522	55.6411	73.0724	83.2736	72.7788
mmu-miR-107-3p	2603.45	3227.25	3412.87	2946.73	3321.56	3011.41	2957.13	3091.99	3144.46
mmu-miR-107-5p	12.1634	8.70487	8.05613	14.0992	10.9639	5.82291	15.3606	9.05148	9.88353
mmu-miR-10a-3p	0	0	0	0	0	0	0	0	0
mmu-miR-10a-5p	440.315	161.201	384.863	418.084	349.848	400.81	475.519	144.824	164.426
mmu-miR-10b-3p	0	0	0	0	0	0	0	0	0
mmu-miR-10b-5p	132.824	20.9562	86.4203	87.4724	250.176	110.312	82.7276	29.8699	37.7371
mmu-miR-1187	0	0.322403	0	0	0.498359	0.64699	0	0	0.299501
mmu-miR-1188-3p	1.45961	2.90162	2.56331	2.87738	1.49508	2.91145	3.07211	2.26287	0.599002
mmu-miR-1188-5p	4.86536	0.967208	4.39425	5.17929	2.49179	6.4699	12.9468	5.43089	4.79202
mmu-miR-1190	0	0	0	0	0	0	0	0	0
mmu-miR-1191a	2.43268	8.06007	6.95757	9.20762	5.98031	8.08737	10.533	8.14633	9.58403
mmu-miR-1191b-3p	0	0	0	0	0	0	0	0	0
mmu-miR-1191b-5p	2.43268	3.22403	5.49281	7.19345	5.98031	4.52893	6.5831	5.88346	8.38603
mmu-miR-1192	0	0	0	0.287738	0	0	0	0	0.299501
mmu-miR-1193-3p	10.7038	12.2513	6.59138	8.34441	11.9606	9.70485	16.6772	10.8618	8.38603
mmu-miR-1193-5p	4.37882	3.22403	4.39425	4.02833	2.49179	4.52893	5.26648	6.33604	8.38603
mmu-miR-1194	5.83843	6.12565	10.2533	3.7406	3.48851	8.41087	6.14422	5.43089	4.49252
mmu-miR-1195	11.1903	6.44805	4.39425	21.2926	30.8983	3.88194	1.53606	17.6504	6.28952
mmu-miR-1197-3p	9.24418	16.1201	14.2813	15.8256	18.4393	9.70485	33.1349	24.8916	21.5641
mmu-miR-1197-5p	0	0.322403	0	0	0.498359	0	0	0	0
mmu-miR-1198-3p	3.89229	6.12565	5.12663	2.30191	3.98687	1.61747	2.85268	4.97831	3.89351
mmu-miR-1198-5p	457.344	458.779	322.611	536.344	477.926	480.713	509.532	496.926	426.489
mmu-miR-1199-3p	0	0	0	0	0	0	0	0	0.299501
mmu-miR-1199-5p	0	0.322403	0	1.72643	0.498359	0.323495	1.09718	0.905148	2.39601
mmu-miR-122-3p	0	0	0	0	0	0	0	0	0
mmu-miR-1224-3p	3.40575	7.41526	7.32375	2.87738	9.46882	5.49941	7.02197	3.62059	4.49252
mmu-miR-1224-5p	219.428	207.305	207.262	278.531	262.635	259.119	449.845	192.344	216.539
mmu-miR-122-5p	2.91921	5.48085	3.66188	3.45286	5.98031	3.23495	5.04704	2.26287	2.69551
mmu-miR-1231-3p	3.89229	2.25682	7.32375	6.0425	4.98359	1.94097	5.26648	4.52574	5.99002
mmu-miR-1231-5p	0.486536	0	1.09856	1.43869	0.996718	0.64699	0.65831	1.8103	0.299501
mmu-miR-124-3p	14390.8	17372.7	19829.1	18620.4	16343.7	13621.7	13893	14758	14327.5
mmu-miR-124-3p	14389.3	17372.3	19827.6	18619	16340.7	13619.8	13891.7	14757.5	14326.6
mmu-miR-124-3p	14389.3	17372.3	19827.6	18619	16340.7	13619.8	13891.7	14757.5	14326.6
mmu-miR-124-5p	87.0899	105.103	108.025	108.765	115.121	91.5491	84.0442	111.333	82.9618
mmu-miR-124-5p	88.5495	105.426	108.392	109.628	115.619	91.5491	85.1414	111.786	82.9618
mmu-miR-124-5p	87.5764	105.103	108.025	109.053	114.623	90.9021	84.7025	111.786	82.6623
mmu-miR-1247-3p	21.8941	5.15844	4.76044	3.16512	1.99344	2.91145	4.38873	3.16802	3.29451
mmu-miR-1247-5p	484.59	197.955	187.488	163.435	90.203	171.129	123.543	108.165	56.3062
mmu-miR-1249-3p	103.146	129.283	121.574	49.491	186.386	200.243	196.835	64.7181	117.404
mmu-miR-1249-5p	0	0	0	1.15095	0	0.323495	0	0	0
mmu-miR-1251-3p	0	0	0	0.287738	0	0	0.438873	0	0
mmu-miR-1251-5p	13.1365	24.1802	49.0691	50.9297	31.3966	25.5561	44.3262	34.8482	32.0466
mmu-miR-1258-3p	0	0	0	0	0.498359	0	0.438873	0.452574	0
mmu-miR-1258-5p	0.486536	0.322403	0	0.287738	0.498359	0.64699	0.65831	0	1.49751
mmu-miR-125a-3p	117.742	124.125	116.814	143.869	109.639	125.516	163.7	128.078	142.263
mmu-miR-125a-5p	42520.8	42838.6	46605.8	42541.2	40759.8	40132.1	46187.4	36031.7	39049.5
mmu-miR-125b-1-3p	2187.95	1731.62	2021.72	2021.36	1732.3	2197.18	2092.11	1737.43	2082.73
mmu-miR-125b-2-3p	3911.75	3285.93	4444.79	3771.96	3296.15	3747.04	2900.07	3249.03	2822.5
mmu-miR-125b-5p	20939	19793.3	24778.5	20580.2	17244.7	17013.2	20465.1	17675.7	16599.2
mmu-miR-125b-5p	20955.6	19807.8	24780.3	20585.9	17256.2	17032	20480.7	17676.2	16607.9
mmu-miR-1264-3p	273.92	122.513	231.064	177.822	96.6816	83.7852	147.242	113.596	92.8453
mmu-miR-1264-5p	32.1114	21.9234	16.4784	19.8539	20.4327	7.44038	15.7994	14.0298	17.3711
mmu-miR-126a-3p	2584.48	2819.73	3074.15	2540.44	2891.48	2172.92	2432.45	2999.66	2608.95
mmu-miR-126a-5p	19982.5	17467.5	20003	21518.5	21624.8	22283	16873.8	19083.7	19534.7
mmu-miR-126b-3p	0	0	0	0	0	0	0	0	0
mmu-miR-126b-5p	0	0	0	0	0	0	0	0	0
mmu-miR-127-3p	54059	36953.8	55118.2	27804.7	41187.4	58413.5	42193.3	37805.3	35516.6
mmu-miR-127-5p	1386.63	1592.67	2235.58	1901.66	1725.32	1538.54	1849.85	1763.68	1596.94
mmu-miR-128-1-5p	547.353	643.838	686.236	568.571	668.798	676.104	491.977	577.484	718.503
mmu-miR-128-2-5p	0	0	0	0.287738	0	0	0.219437	0	0.599002
mmu-miR-128-3p	183027	187226	142082	143528	160399	126893	159564	171990	128086
mmu-miR-128-3p	162881	167407	131579	130442	145215	120141	142764	152559	119307
mmu-miR-1291	0.973072	0.322403	0.366188	1.15095	0.996718	0	0	0.452574	0.898503
mmu-miR-129-1-3p	101.686	109.617	203.967	115.671	153.495	120.34	115.643	111.333	174.31
mmu-miR-129-2-3p	1365.22	1590.09	3048.51	1403.87	1936.12	1842.63	1132.29	1504.81	2121.07
mmu-miR-129-5p	1750.56	2094.33	1836.43	2042.94	2281.49	2245.38	1692.95	2489.16	1909.92
mmu-miR-129-5p	1750.56	2094.65	1836.06	2042.94	2279.49	2245.38	1693.39	2488.7	1911.42
mmu-miR-1298-3p	1288.83	1102.29	1603.54	1025.79	824.286	685.162	807.746	963.983	882.031
mmu-miR-1298-5p	7112.67	1420.51	5091.47	2932.05	903.026	715.571	805.113	1041.83	967.688
mmu-miR-129b-3p	0	0	0.366188	0.575476	0.498359	0	0	0	0
mmu-miR-129b-5p	0	0.967208	0	0.287738	0	0.64699	0	0	0.299501
mmu-miR-1306-3p	3.40575	4.51364	2.19713	3.16512	4.98359	1.29398	4.8276	4.52574	5.99002
mmu-miR-1306-5p	9.73072	16.1201	23.8022	11.7973	18.9376	11.9693	14.7022	10.4092	14.6756
mmu-miR-130a-3p	3137.18	2331.62	2075.55	2483.76	2161.88	2566.93	2202.92	2138.86	2120.47
mmu-miR-130a-5p	0.486536	0.322403	1.46475	0.863215	0.498359	0	0	0.905148	0
mmu-miR-130b-3p	157.151	193.764	150.869	198.539	211.304	212.536	176.427	164.737	227.621
mmu-miR-130b-5p	93.4149	159.912	125.602	118.836	110.636	99.6364	160.847	137.13	128.486
mmu-miR-130c	0	0	0	0	0	0	0	0	0
mmu-miR-132-3p	14845.7	15435.7	14585.3	15101.1	16864.5	15160.9	12880.5	16726.7	14910.1
mmu-miR-132-5p	1302.94	1724.85	1524.07	1518.97	1467.17	1191.43	1460.35	1535.58	1565.49
mmu-miR-133a-3p	29.6787	66.7374	98.8707	58.4109	55.3178	53.0532	93.9188	61.5501	97.0383
mmu-miR-133a-3p	29.6787	66.7374	98.8707	58.4109	55.3178	53.0532	93.9188	61.5501	97.0383
mmu-miR-133a-5p	0	0	0	0	0	0	0.438873	1.35772	0.299501
mmu-miR-133a-5p	0	0	0	0	0	0	0.438873	1.35772	0.299501
mmu-miR-133b-3p	0	1.28961	2.56331	0.575476	1.49508	0.970485	1.75549	1.8103	0.599002
mmu-miR-133b-5p	0	0	0	0	0	0	0	0	0
mmu-miR-133c	0	0	0	0	0	0	0	0	0
mmu-miR-134-3p	56.4381	67.3822	70.6742	63.5901	66.2817	52.0827	52.0065	57.4769	53.6107
mmu-miR-134-5p	361.01	304.348	362.16	386.432	341.376	417.955	674.109	451.216	291.115
mmu-miR-135a-1-3p	17.0288	13.8633	11.3518	10.0708	9.96718	12.6163	9.43577	8.14633	10.4825
mmu-miR-135a-2-3p	48.167	53.8413	93.744	83.1563	54.8195	52.0827	94.1383	69.6964	70.0832
mmu-miR-135a-5p	195.587	304.026	342.019	383.267	326.425	252.65	309.844	310.466	274.043
mmu-miR-135a-5p	195.587	303.381	342.385	383.555	326.923	252.973	309.406	308.203	273.744
mmu-miR-135b-3p	5.35189	5.80325	8.42232	12.085	14.4524	10.9988	19.3104	14.9349	13.4775
mmu-miR-135b-5p	36.4902	61.5789	57.8576	103.873	83.7243	55.9646	77.6805	75.5799	59.9002
mmu-miR-136-3p	20892.3	28953.1	33339.6	27421.7	26596.9	23229.2	25125.9	26800.1	25314.4
mmu-miR-136-5p	5281.83	8001.71	7198.15	6813.93	6971.04	5801.88	6636.86	7123.06	6283.23
mmu-miR-137-3p	1098.11	1685.84	1670.18	1342.01	1389.92	1074.65	1069.09	1394.38	1036.57
mmu-miR-137-5p	30.6518	29.3386	30.3936	24.7455	26.413	29.438	29.6239	22.1761	18.5691
mmu-miR-138-1-3p	784.782	1241.9	1228.56	1007.66	1172.14	1027.74	945.991	1075.32	1334.58
mmu-miR-138-2-3p	50.1132	54.4861	57.4915	45.7504	50.3342	49.4947	45.6428	32.1328	45.8237
mmu-miR-138-5p	13436.2	28588.4	29644	15255.3	30846.9	20574.6	11426.3	26943.5	24911.6
mmu-miR-138-5p	13373.9	28454.9	29496.8	15181.1	30709.9	20493.7	11353.6	26830.9	24793.3
mmu-miR-139-3p	106.551	77.0542	83.1246	77.6893	71.2653	65.0225	88.2135	64.2655	82.3628
mmu-miR-139-5p	1475.18	2149.78	2167.83	1344.6	1785.62	1646.59	1244.42	1821.16	1864.39
mmu-miR-140-3p	1552.54	1715.83	2632.52	1987.12	2031.31	1883.06	1567	1911.22	1606.52
mmu-miR-140-5p	109.471	94.464	113.152	95.8168	119.606	91.2256	92.6022	94.588	54.2097
mmu-miR-141-3p	5.35189	5.80325	8.05613	7.48119	6.47867	10.3518	21.5048	9.50405	7.78703
mmu-miR-141-5p	0	0	0	0	0	0	0.65831	0	0
mmu-miR-142a-3p	56.9247	57.0653	65.5476	64.7411	56.8129	68.9044	43.229	61.5501	59.0017
mmu-miR-142a-5p	946.312	1336.68	1553.37	1239	1245.4	1207.28	1082.7	1358.17	1284.26
mmu-miR-142b	0	0	0	0.287738	0	0	0	0	0.599002
mmu-miR-143-3p	36804.5	36976	43026.7	48241	46119.6	48423.9	61069.2	40174.5	47916.3
mmu-miR-143-5p	4.37882	5.80325	4.76044	5.46703	2.49179	4.20543	3.94986	8.14633	6.58902
mmu-miR-144-3p	60.3304	53.1964	74.7023	77.977	59.8031	124.869	69.7808	73.317	63.7937
mmu-miR-144-5p	51.0863	44.1692	48.3368	49.491	56.8129	88.6376	51.787	52.9512	59.6007
mmu-miR-145a-3p	90.4957	59.6445	66.6462	101.859	74.7538	80.2267	99.8436	57.4769	99.7338
mmu-miR-145a-5p	46.7074	74.475	120.11	86.6092	93.1931	62.111	73.9501	76.9376	82.9618
mmu-miR-145b	0.973072	2.57922	1.09856	0.863215	1.49508	1.29398	0.877746	0.905148	0.299501
mmu-miR-146a-3p	0	0	0.366188	0	0	0	0.219437	0	0
mmu-miR-146a-5p	1554	1389.88	904.117	1597.52	1704.89	1708.05	1399.79	1462.72	1316.61
mmu-miR-146b-3p	1.94614	2.57922	5.49281	2.30191	3.98687	4.20543	1.97493	3.16802	2.99501
mmu-miR-146b-5p	7549.58	6190.45	3731.09	6308.95	7202.28	7974.8	6176.7	5466.19	5108.89
mmu-miR-147-3p	4.37882	3.54643	7.32375	3.16512	11.9606	4.52893	4.38873	3.62059	7.48753
mmu-miR-147-5p	0	0	0	0	0	0	0	0	0
mmu-miR-148a-3p	12056.8	11879.6	13728.4	11407.4	12590	14045.8	12972.6	10994.4	10858.4
mmu-miR-148a-5p	126.499	130.896	159.658	104.161	144.026	129.074	148.12	124.458	116.506
mmu-miR-148b-3p	2343.16	2343.87	2863.59	2242.92	2618.88	2602.19	1982.61	2544.82	2720.67
mmu-miR-148b-5p	121.147	175.065	166.615	160.558	172.432	118.076	150.972	185.555	185.691
mmu-miR-149-3p	0	0.322403	0	0	0.498359	0	0.219437	0.452574	0
mmu-miR-149-5p	1126.82	2247.79	2906.43	1837.5	2576.02	1753.67	1456.18	2128	1999.17
mmu-miR-150-3p	6.32497	4.19124	5.12663	4.31607	5.48195	5.82291	6.5831	5.88346	3.89351
mmu-miR-150-5p	1330.19	2300.67	2843.08	1446.46	2178.33	1544.69	1379.6	2339.36	1978.8
mmu-miR-151-3p	17565.4	13616.4	18667.1	18908.7	14992.1	23371.9	17021.9	15327.3	16513.3
mmu-miR-151-5p	11234.1	10284.3	11128.8	11308.1	9311.34	9665.7	10283.7	9359.68	10349.3
mmu-miR-152-3p	47.6805	44.814	49.8015	35.9673	59.3047	35.5844	30.2822	43.8997	29.0516
mmu-miR-152-5p	18.4884	15.4753	31.8583	18.4152	21.4294	21.0272	17.1161	26.7019	25.1581
mmu-miR-153-3p	11148.5	14524.6	15988.9	17605	14427	13956.5	13110.7	12703.8	12907.6
mmu-miR-153-5p	1.94614	2.90162	2.56331	2.01417	0.498359	1.94097	1.97493	2.71544	2.69551
mmu-miR-154-3p	10.2173	14.5081	12.8166	9.20762	12.459	11.9693	10.3135	8.59891	9.88353
mmu-miR-154-5p	115.796	134.442	157.095	117.109	154.491	110.312	105.549	123.1	106.622
mmu-miR-155-3p	0	0	0	0	0.498359	0	0	0	0
mmu-miR-155-5p	11.1903	3.54643	5.859	9.20762	7.97374	6.79339	7.02197	11.7669	6.88852
mmu-miR-15a-3p	4.37882	2.57922	3.66188	4.02833	2.99015	2.26446	1.97493	1.8103	1.49751
mmu-miR-15a-5p	429.611	594.511	549.648	515.051	641.886	482.007	468.278	589.704	597.804
mmu-miR-15b-3p	4.37882	5.15844	3.66188	0.863215	4.98359	2.26446	4.16929	3.16802	1.79701
mmu-miR-15b-5p	46.2209	35.4643	51.2663	49.491	39.3704	44.6423	42.1318	41.6368	41.6306
mmu-miR-16-1-3p	8.75764	11.9289	13.1828	7.48119	13.4557	11.9693	6.14422	11.7669	13.777
mmu-miR-16-2-3p	3.89229	2.90162	1.46475	3.7406	1.99344	1.61747	4.60817	4.97831	3.29451
mmu-miR-16-5p	12285	13459.3	13154.9	13213.2	15710.8	12474.6	10997.9	12331.7	13254.7
mmu-miR-16-5p	12279.7	13454.2	13153.5	13212.6	15710.3	12471.7	10994.9	12328.1	13252
mmu-miR-1668	0.973072	0	1.46475	0	0.498359	0	0.219437	0	1.198
mmu-miR-17-3p	18.0018	17.0873	20.1403	15.8256	18.4393	13.9103	15.1411	18.5555	13.777
mmu-miR-17-5p	75.413	77.6991	91.9131	80.8544	82.7276	60.817	65.3921	77.8427	66.7887
mmu-miR-181a-1-3p	628.118	833.411	1100.76	755.313	930.934	863.084	866.555	1017.84	986.856
mmu-miR-181a-2-3p	0	0	0	0.287738	0	0	0.219437	0	0.599002
mmu-miR-181a-5p	249985	247048	287004	291886	311365	336065	297807	299155	318417
mmu-miR-181a-5p	249984	247047	287002	291883	311364	336064	297805	299153	318416
mmu-miR-181b-1-3p	27.7325	29.661	28.5626	22.7313	37.3769	27.1736	23.9186	23.5338	23.6606
mmu-miR-181b-2-3p	1.94614	2.57922	0.366188	0.575476	1.49508	0.64699	1.97493	1.35772	0.599002
mmu-miR-181b-5p	24700.9	21631.6	20210.3	26754.5	27485	31631.7	27741.6	27173.4	29745.2
mmu-miR-181b-5p	24819.2	21762.2	20369.2	26891.4	27652.4	31778.8	27877.2	27348.1	29921.1
mmu-miR-181c-3p	546.866	718.958	855.048	653.741	761.991	644.078	713.388	695.154	664.293
mmu-miR-181c-5p	16724.2	20226.9	24021.5	23318.3	23019.7	21828.5	26756.8	24121.7	24310.5
mmu-miR-181d-3p	0.486536	0.322403	1.09856	0.575476	0	0	1.31662	0	0
mmu-miR-181d-5p	5506.13	4010.04	3924.07	5822.96	5232.77	6432.7	6886.58	4844.35	5186.46
mmu-miR-182-3p	0	0	0	0	0	0	0	0	0
mmu-miR-182-5p	106.551	110.262	95.2088	144.732	366.792	559.97	456.428	99.1137	210.549
mmu-miR-183-3p	0	0	0	0	0	0	0.219437	0	0
mmu-miR-183-5p	10.2173	7.73767	14.2813	12.9482	23.4229	42.7013	23.6991	4.52574	13.4775
mmu-miR-1839-3p	95.361	115.743	162.221	103.01	100.668	105.136	84.2636	97.3034	110.815
mmu-miR-1839-5p	2160.71	2778.14	2219.46	2384.2	2437.97	2250.55	2915.43	2613.16	2978.54
mmu-miR-1843a-3p	96.3341	95.7536	123.771	108.477	88.7079	95.1075	97.6493	101.377	80.5658
mmu-miR-1843a-5p	3542.95	4220.25	4013.05	4060.27	4024.25	4262.69	3592.4	3920.2	4119.34
mmu-miR-1843b-3p	1419.22	1376.34	1573.87	1186.34	1063	1284.92	1541.76	1265.85	1220.47
mmu-miR-1843b-5p	3535.66	4206.39	4002.06	4043.58	4011.29	4246.19	3575.94	3907.98	4102.86
mmu-miR-1843b-5p	4200.75	4262.81	4408.53	4527.56	4211.13	4599.77	3979.92	4055.06	4342.77
mmu-miR-184-3p	54.492	39.9779	34.0555	32.2267	76.2489	66.6399	41.9124	40.2791	62.8952
mmu-miR-184-5p	0	0	0	0	0	0	0	0	0
mmu-miR-185-3p	24.3268	31.2731	37.3511	39.1324	46.8457	28.4676	31.5989	37.1111	29.6506
mmu-miR-185-5p	126.013	123.803	195.178	136.1	157.481	133.28	162.164	131.246	113.511
mmu-miR-186-3p	3.40575	4.19124	4.76044	2.30191	4.48523	3.23495	4.60817	2.71544	3.29451
mmu-miR-186-5p	13295.6	13872	14831	14841.8	13946.1	14136.7	13065.3	12668.9	13060
mmu-miR-187-3p	71.0342	150.562	112.053	187.318	149.508	117.752	340.127	187.818	374.077
mmu-miR-187-5p	9.73072	12.5737	16.1123	17.552	8.4721	8.08737	27.649	10.4092	24.5591
mmu-miR-188-3p	9.73072	7.41526	9.88707	9.20762	5.98031	8.41087	11.4107	8.59891	8.68553
mmu-miR-188-5p	15.0826	29.661	40.2806	25.8964	34.8851	17.4687	13.1662	32.1328	23.3611
mmu-miR-1892	0	0	0	0	0	0	0	0	0
mmu-miR-1893	0	0	0	0.287738	0	0	0	0.452574	0.299501
mmu-miR-1894-3p	0	0	0	0	0	0	0	0	0
mmu-miR-1894-5p	0	0	0	0	0	0	0	0	0
mmu-miR-1895	5.35189	9.99448	7.68994	12.085	13.954	6.4699	3.51098	4.52574	11.0815
mmu-miR-1896	0	0	0	0	0	0	0	0	0
mmu-miR-1897-3p	0	0	0	0	0	0	0	0	0
mmu-miR-1897-5p	0	0	0	0	0	0	0.438873	0	0
mmu-miR-1898	0	0	0	0	0	0	0	0	0
mmu-miR-1899	0	0	0	0	0	0	0	0	0
mmu-miR-18a-3p	3.40575	4.83604	3.66188	4.02833	3.48851	6.79339	9.21634	3.62059	4.19301
mmu-miR-18a-5p	2.91921	4.83604	7.32375	5.46703	1.99344	4.52893	5.92479	8.59891	2.39601
mmu-miR-18b-3p	0	0	0	0	0	0	0	0	0.299501
mmu-miR-18b-5p	0	0	0.732375	0	0	0	0	0	0
mmu-miR-1900	0	0	0	0	0	0	0	0	0
mmu-miR-1901	0	0	0	0	0	0	0	0	0
mmu-miR-1902	0	0	0	0	0	0	0	0	0.299501
mmu-miR-1903	0	0	0	0	0	0	0	0.452574	0
mmu-miR-1904	0	0	0	0	0	0	0	0	0
mmu-miR-1905	0	0	0	0	0	0	0	0	0
mmu-miR-1906	0	0	0	1.15095	0.996718	0	0	0	0
mmu-miR-1906	0	0	0	1.15095	0.996718	0	0	0	0
mmu-miR-1907	0	0	0	0	0	0	0	0	0
mmu-miR-190a-3p	6.32497	5.80325	5.12663	5.46703	2.99015	4.85242	5.04704	4.52574	5.69052
mmu-miR-190a-5p	73.4669	118.322	92.2793	95.8168	110.636	78.6093	83.1665	108.165	81.7638
mmu-miR-190b-3p	0	0	1.09856	0.575476	0.498359	0	0.877746	0	0
mmu-miR-190b-5p	13.623	3.54643	4.02806	6.33024	7.47538	3.55844	5.26648	3.62059	2.99501
mmu-miR-1912-3p	113.849	20.9562	68.4771	44.0239	5.48195	9.05786	8.77746	9.95663	14.9751
mmu-miR-1912-5p	4.37882	0.322403	2.56331	1.72643	1.49508	0	0.65831	0.905148	0.599002
mmu-miR-191-3p	99.7398	111.551	131.461	118.548	98.6751	127.133	102.477	101.377	111.714
mmu-miR-191-5p	77415.1	47799.1	64602.5	66497.7	58406.7	79783.9	56205.4	46373	53501.1
mmu-miR-192-3p	0	0.322403	1.46475	0.575476	0.996718	0	0.65831	0	0.299501
mmu-miR-192-5p	4010.03	3947.18	4691.23	4356.64	4219.11	4777.7	4397.07	4185.4	4313.11
mmu-miR-1927	1.94614	7.41526	2.56331	4.31607	1.49508	2.91145	5.04704	1.8103	5.39102
mmu-miR-1928	0	0	0	0	0	0	0	0	0
mmu-miR-1929-3p	0	0	0	0	0	0	0	0	0
mmu-miR-1929-5p	0.486536	0.644805	0.366188	0.575476	0.498359	0.323495	0.219437	0	0
mmu-miR-1930-3p	0	0	0	0	0	0	0	0	0
mmu-miR-1930-5p	0.486536	1.61201	2.56331	2.01417	0.498359	1.61747	0.877746	0.452574	1.198
mmu-miR-1931	0	0.322403	0.366188	0	0	0	0	0	0.599002
mmu-miR-1932	0	0	0	0	0	0	0	0	0
mmu-miR-1933-3p	3.40575	4.83604	5.859	3.16512	2.99015	4.52893	3.94986	6.33604	3.59401
mmu-miR-1933-5p	0	0.322403	0.366188	0	0	0	0.438873	0	0
mmu-miR-1934-3p	0	0	0	0	0	0.64699	0.438873	0.452574	0
mmu-miR-1934-5p	4.86536	4.19124	3.29569	3.7406	3.98687	4.52893	3.29155	3.16802	5.39102
mmu-miR-1936	0	0	0	0	0	0.323495	0.877746	0	0
mmu-miR-1938	0	0	0	0.287738	0	0	0	0.452574	0
mmu-miR-193a-3p	7.78457	29.661	36.985	18.1275	39.3704	13.5868	4.8276	26.2493	13.4775
mmu-miR-193a-5p	1.45961	0.322403	1.09856	0.863215	0.996718	0.64699	0.877746	1.35772	0.299501
mmu-miR-193b-3p	17.0288	38.0435	61.8857	42.2975	28.9048	26.2031	66.7087	44.3523	91.3478
mmu-miR-193b-5p	3.40575	4.83604	4.76044	3.16512	1.49508	4.20543	12.9468	7.24118	4.49252
mmu-miR-1941-3p	0	0.322403	0	0.287738	0.498359	0.323495	0	0	0.299501
mmu-miR-194-1-3p	0	0	0	0	0	0	0.219437	0.452574	0
mmu-miR-1941-5p	0	0.322403	0.732375	0	1.99344	0	0.219437	0	0.599002
mmu-miR-1942	0	0	0	0	0	0	0	0	0
mmu-miR-194-2-3p	2.91921	0.967208	1.09856	2.58964	0.996718	1.61747	1.31662	0.452574	3.89351
mmu-miR-1943-3p	0	0	0.366188	0.575476	0	0.970485	1.09718	0.452574	0.599002
mmu-miR-1943-5p	20.4345	24.825	26.7317	40.2833	25.9147	28.791	28.7462	13.5772	31.4476
mmu-miR-1945	0.486536	0.644805	0.366188	0.287738	2.49179	1.61747	0.438873	2.26287	2.69551
mmu-miR-194-5p	131.365	260.501	288.556	225.587	244.694	207.037	190.471	281.954	215.641
mmu-miR-194-5p	141.095	281.458	309.062	244.865	272.104	223.211	203.418	300.057	230.915
mmu-miR-1946a	0	0	0	0	0	0	0	0	0
mmu-miR-1946b	0	0	0.366188	0	0	0	0	0	0
mmu-miR-1947-3p	0.973072	0	0	0	0	0	0	0	0
mmu-miR-1947-5p	44.2748	37.7211	46.872	41.1466	35.3835	40.1134	45.8622	29.8699	40.1331
mmu-miR-1948-3p	7.78457	8.38247	7.68994	11.7973	10.4655	8.73436	9.21634	9.50405	11.381
mmu-miR-1948-5p	0.973072	1.93442	0	1.72643	1.49508	0.323495	1.09718	1.35772	2.09651
mmu-miR-1949	0.973072	0	0.732375	0.287738	0	0.64699	0.65831	0.905148	0.299501
mmu-miR-1950	0	0	0	0	0	0	0	0.905148	0
mmu-miR-1951	1.45961	0	0	0	0.498359	0.323495	0	0	0
mmu-miR-1952	0	0	0	0	0	0	0	0	0
mmu-miR-1953	0	0	0	0	0	0	0	0	0
mmu-miR-1954	0	0	0.366188	0	0	0	0	0	0
mmu-miR-1955-3p	1.94614	1.28961	0.732375	0.863215	1.49508	0.970485	1.31662	0.452574	2.69551
mmu-miR-1955-5p	3.89229	1.28961	5.12663	5.17929	2.99015	1.29398	3.73042	2.71544	0.898503
mmu-miR-1956	0	0	0	0	0	0	0	0	0
mmu-miR-1957a	18.4884	3.54643	2.9295	3.45286	2.49179	2.26446	1.31662	5.88346	2.69551
mmu-miR-1957b	0	0	0	0	0	0	0	0	0
mmu-miR-1958	0	0	0	0	0	0	0	0	0
mmu-miR-195a-3p	37.4633	26.437	42.1116	35.1041	24.9179	32.026	43.229	38.4688	35.3411
mmu-miR-195a-5p	344.954	260.179	331.034	299.535	303.002	261.707	317.305	289.647	263.86
mmu-miR-195b	0	0	0	0	0	0	0	0	0
mmu-miR-1960	2.43268	0.967208	1.09856	1.15095	0	3.23495	2.4138	1.8103	2.09651
mmu-miR-1961	3.89229	3.22403	3.29569	4.31607	3.98687	2.58796	3.51098	2.26287	5.09152
mmu-miR-1962	0	0	0	0	0	0	0	0	0
mmu-miR-1963	0	0.322403	0.366188	0	0	0	0	0	0
mmu-miR-1964-3p	41.8421	28.049	32.9569	27.6229	20.4327	30.732	35.1098	29.8699	27.5541
mmu-miR-1964-5p	0	0	1.09856	0.863215	0.498359	0.323495	0	0	0.299501
mmu-miR-1966-3p	6.32497	8.38247	7.32375	5.75476	3.48851	10.0283	7.02197	5.88346	9.88353
mmu-miR-1966-5p	1.45961	0.644805	0.366188	1.15095	0	0.323495	0.219437	0.905148	0.599002
mmu-miR-1967	0	0	0	0	0	0	0	0	0
mmu-miR-1968-3p	0	0	0	0	0.498359	0	0	0	0
mmu-miR-1968-5p	8.27111	7.41526	10.9856	5.46703	8.4721	7.11689	4.38873	7.69376	6.88852
mmu-miR-1969	8.27111	9.67208	13.9151	12.6605	11.9606	10.9988	18.2132	14.0298	13.178
mmu-miR-196a-1-3p	0	0	0	0	0	0	0	0	0
mmu-miR-196a-2-3p	0	0	0	0	0	0	0	0	0
mmu-miR-196a-5p	0	0.322403	0	0.575476	0	0	0	0	0
mmu-miR-196a-5p	0	0.322403	0	0.575476	0	0	0	0	0
mmu-miR-196b-3p	0	0	0	0	0	0	0	0	0
mmu-miR-196b-5p	0.973072	0	0	0	0	0	0.219437	0	0
mmu-miR-1970	0	0	0	0	0	0	0	0	0
mmu-miR-1971	0	0	0	0	0	0.323495	0	0.452574	0
mmu-miR-1981-3p	261.756	237.288	241.318	246.879	242.202	231.622	233.042	221.761	213.544
mmu-miR-1981-5p	234.024	314.02	273.908	254.648	416.628	312.82	269.688	373.374	291.714
mmu-miR-1982-3p	7.29804	5.80325	8.05613	12.9482	8.97046	13.9103	11.1913	4.97831	7.48753
mmu-miR-1982-5p	0	0	0	0	0	0	0	0	0.299501
mmu-miR-1983	274.893	245.993	285.626	269.035	234.727	219.33	362.07	329.021	285.724
mmu-miR-199a-3p	129.419	138.633	120.842	136.388	161.967	175.334	149.656	148.444	125.191
mmu-miR-199a-3p	129.905	139.6	121.208	137.827	162.963	176.628	150.753	148.897	125.491
mmu-miR-199a-3p	129.419	138.633	120.842	136.388	161.967	175.334	149.656	148.444	125.191
mmu-miR-199a-5p	18.9749	5.80325	15.7461	7.19345	11.9606	9.70485	12.5079	9.05148	2.99501
mmu-miR-199a-5p	18.9749	5.80325	15.7461	7.19345	11.9606	9.70485	12.5079	9.05148	2.99501
mmu-miR-199b-3p	129.419	138.633	120.842	136.388	161.967	175.334	149.656	148.444	125.191
mmu-miR-199b-3p	129.905	139.6	121.208	137.827	162.963	176.628	150.753	148.897	125.491
mmu-miR-199b-3p	129.419	138.633	120.842	136.388	161.967	175.334	149.656	148.444	125.191
mmu-miR-199b-5p	1.45961	1.61201	1.83094	0.575476	0.996718	1.61747	2.4138	0.452574	1.49751
mmu-miR-19a-3p	8.75764	5.80325	5.859	6.33024	7.47538	9.38135	10.533	7.24118	7.18802
mmu-miR-19a-5p	0	0	0	0	0	0	0.219437	0.452574	0
mmu-miR-19b-1-5p	0	0	0	0.287738	0	0	0	0	0
mmu-miR-19b-2-5p	0	0	0	0	0	0	0	0	0
mmu-miR-19b-3p	103.632	80.2783	117.912	86.0337	82.7276	68.5809	89.5301	91.8725	80.5658
mmu-miR-19b-3p	103.632	79.9559	118.645	86.6092	82.7276	68.5809	90.1884	91.42	81.1648
mmu-miR-1a-1-5p	0	0	0	0	0	0	0	0	0
mmu-miR-1a-2-5p	0	0	0	0	0	0	0	0	0
mmu-miR-1a-3p	4.86536	6.44805	5.859	2.30191	4.48523	1.94097	11.1913	5.43089	3.59401
mmu-miR-1a-3p	4.86536	6.44805	5.859	2.30191	4.48523	1.94097	11.1913	5.43089	3.59401
mmu-miR-1b-3p	1.94614	0.322403	1.46475	0.863215	0.996718	0.970485	0.877746	0.452574	0.599002
mmu-miR-1b-5p	0	0	0.366188	0	0	0.323495	0	0	0
mmu-miR-200a-3p	5.83843	2.57922	4.76044	2.01417	3.48851	6.79339	9.65521	4.07317	1.198
mmu-miR-200a-5p	0	0	0.366188	0	0	0	0.65831	0	0
mmu-miR-200b-3p	12.1634	1.61201	6.22519	8.63215	2.49179	2.91145	14.7022	3.62059	0.898503
mmu-miR-200b-5p	0	0	0.366188	0.287738	0	0.323495	0.65831	0	0
mmu-miR-200c-3p	0	0.322403	0.366188	1.43869	0.996718	0.970485	0.877746	0.905148	1.198
mmu-miR-200c-5p	0	0	0	0	0	0	0	0	0
mmu-miR-201-3p	0	0.322403	0	0.287738	0	0	0	0	0
mmu-miR-201-5p	1.94614	4.19124	2.19713	2.01417	2.99015	1.61747	2.4138	1.8103	2.69551
mmu-miR-202-3p	0	0	0	0	0	0.64699	0	0	0
mmu-miR-202-5p	0.973072	0.967208	0	0.863215	0	0.64699	0.219437	0	0.299501
mmu-miR-203-3p	223.806	262.436	249.008	211.2	376.759	212.213	202.759	276.07	220.732
mmu-miR-203-5p	0	2.57922	3.29569	2.30191	0.498359	1.29398	0.65831	1.8103	0.898503
mmu-miR-204-3p	30.6518	5.48085	30.3936	14.0992	9.96718	6.1464	7.46084	8.14633	7.18802
mmu-miR-204-5p	57142.2	12336.4	30897.4	22798.4	12471.9	10468.3	11247	9063.7	10196.8
mmu-miR-205-3p	0	0	0	0.287738	0	0	0	0	0
mmu-miR-205-5p	7.29804	3.86883	12.0842	6.0425	11.9606	3.23495	4.38873	4.97831	3.29451
mmu-miR-206-3p	1.94614	1.28961	0.732375	0.575476	0	0.970485	1.31662	1.35772	0
mmu-miR-206-5p	0	0	0	0	0	0	0	0	0
mmu-miR-207	0	0	0	0.287738	0	0	0	0	0
mmu-miR-208a-3p	0	0	1.83094	0.575476	0	0	0	0	0
mmu-miR-208a-5p	0	0	0	0	0	0	0	0	0
mmu-miR-208b-3p	17.5153	16.4425	20.5065	23.8823	12.459	13.9103	14.7022	11.7669	13.777
mmu-miR-208b-5p	0	0	0	0	0	0	0	0	0
mmu-miR-20a-3p	2.91921	1.28961	1.09856	0.575476	2.49179	2.26446	1.75549	0.452574	0.599002
mmu-miR-20a-5p	49.6266	50.9396	58.59	41.722	50.3342	39.4664	56.1758	61.0975	32.9451
mmu-miR-20b-3p	0	0	0	0.287738	0	0	0	0	0.299501
mmu-miR-20b-5p	2.91921	0.322403	1.83094	1.43869	0	0.64699	1.31662	0.905148	1.198
mmu-miR-210-3p	72.9804	98.9776	118.645	91.7885	113.626	92.5195	84.7025	105.902	111.414
mmu-miR-210-5p	32.1114	36.4315	40.2806	27.9106	33.39	32.3495	27.8684	33.4905	27.2546
mmu-miR-211-3p	0	0	0	0	0	0.323495	0	0.452574	0
mmu-miR-211-5p	85.1438	25.4698	55.6605	51.7929	33.39	29.438	25.6741	24.8916	32.6456
mmu-miR-212-3p	2634.1	3392.97	2979.3	3557.02	3132.68	3102.64	3298.35	3332.76	3382.56
mmu-miR-212-5p	1637.68	1553.34	1509.43	1794.34	1470.16	1629.44	1789.72	1423.35	1694.58
mmu-miR-2136	0	0	0	0	0	0	0	0	0
mmu-miR-2137	57.8978	35.4643	27.8303	35.9673	77.2456	16.1747	16.2383	70.149	28.1531
mmu-miR-2139	0	0	0	0	0	0	0	0	0
mmu-miR-214-3p	2.43268	1.61201	2.19713	0.575476	1.99344	2.58796	0.877746	0	0.599002
mmu-miR-214-5p	0	0.967208	1.09856	0	0	0	0.219437	0	0.599002
mmu-miR-215-3p	0	0	0	0.287738	0.498359	0	0	0	0
mmu-miR-215-5p	11.1903	19.6666	13.9151	16.9766	22.4262	14.8808	14.9217	17.6504	16.7721
mmu-miR-216a-3p	0	0.322403	0.732375	1.43869	1.49508	1.29398	0.65831	0.905148	1.198
mmu-miR-216a-5p	5.35189	2.90162	3.29569	6.33024	4.98359	2.58796	4.60817	2.26287	3.29451
mmu-miR-216b-3p	0	0	0	0	0	0	0	0	0
mmu-miR-216b-5p	0	3.22403	2.9295	2.87738	0.498359	1.29398	2.63324	1.35772	2.39601
mmu-miR-216c-3p	0	0	0	0	0	0	0	0	0
mmu-miR-216c-5p	0	0	0	0	0	0	0	0	0
mmu-miR-217-3p	1.94614	0	0.732375	0.575476	0	0	1.09718	0	0.299501
mmu-miR-217-5p	2.43268	4.19124	5.49281	8.91988	6.47867	8.41087	6.80253	7.24118	5.09152
mmu-miR-218-1-3p	104.119	90.2728	99.9692	102.147	74.2555	112.9	105.33	78.2953	76.9718
mmu-miR-218-2-3p	21.8941	35.1419	35.5202	14.9624	20.4327	21.9977	15.58	23.5338	15.8736
mmu-miR-2183	0	0	0	0	0	0	0	0	0
mmu-miR-218-5p	6866.97	8008.48	6062.97	5237.12	7327.37	6314.62	3358.04	6908.54	5587.79
mmu-miR-218-5p	6981.79	8123.26	6157.45	5337.83	7419.57	6434.64	3422.99	6997.7	5657.28
mmu-miR-219a-1-3p	17.0288	11.2841	14.2813	12.3727	8.97046	9.70485	12.9468	19.0081	18.2696
mmu-miR-219a-2-3p	1673.2	1451.78	1525.54	2281.48	2071.68	1973.97	2060.51	1994.95	2121.07
mmu-miR-219a-5p	83.6842	95.7536	167.714	164.874	98.6751	80.5502	110.377	105.902	86.5558
mmu-miR-219a-5p	149.366	167.649	276.472	300.686	184.891	140.72	205.831	200.943	167.421
mmu-miR-219b-3p	0.486536	0.322403	0.366188	1.43869	0	0.323495	0.219437	0.452574	0
mmu-miR-219b-5p	0.486536	0	0	0	0	0	0	0	0
mmu-miR-219c-3p	1.94614	1.61201	1.83094	1.43869	0	0.64699	1.97493	0.905148	1.198
mmu-miR-219c-5p	0.973072	0.322403	0.366188	0.863215	0	0.323495	0.877746	0.452574	0.299501
mmu-miR-21a-3p	32.1114	23.213	58.9562	57.5476	47.8425	45.2893	34.671	41.6368	26.9551
mmu-miR-21a-5p	2770.33	3608.65	3724.86	4228.02	3972.42	3682.99	3469.73	4134.72	4199.6
mmu-miR-21b	0	0.322403	0.732375	0.575476	0.996718	0	1.09718	0.452574	1.79701
mmu-miR-21c	0	0.322403	0.732375	0.575476	0.996718	0	1.09718	0.452574	1.79701
mmu-miR-221-3p	5632.62	5399.92	5125.89	4466.85	3911.12	3896.5	3333.68	4992.8	3414.01
mmu-miR-221-5p	166.882	172.485	229.233	165.449	115.619	128.104	105.549	148.444	130.582
mmu-miR-222-3p	29483.6	20812.4	19341.7	19129.4	13602.7	16007.8	20648.8	19858	13923.2
mmu-miR-222-5p	225.266	216.655	191.516	180.987	144.524	173.07	142.853	185.103	181.797
mmu-miR-223-3p	10.7038	5.80325	8.42232	12.6605	11.4623	7.76388	8.77746	8.59891	8.38603
mmu-miR-223-5p	0	0	0	0.863215	0	0.970485	0.438873	0	0.599002
mmu-miR-22-3p	178261	221753	265861	187873	208947	193928	158994	215360	216810
mmu-miR-224-3p	0	0	0	0	0	0	0	0	0
mmu-miR-224-5p	4.37882	1.28961	0.366188	0.575476	0.996718	0.64699	2.19437	0.905148	0.299501
mmu-miR-22-5p	45.2478	86.0815	67.3785	56.6844	92.6948	59.8466	49.1538	87.7994	65.5907
mmu-miR-23a-3p	798.892	645.773	848.091	708.987	633.414	582.614	558.247	587.894	622.663
mmu-miR-23a-5p	0	0	0	0	0	0	0	0	0
mmu-miR-23b-3p	2065.34	1654.89	2052.12	1571.91	1475.14	1457.67	1351.29	1496.66	1505.29
mmu-miR-23b-5p	0	0.322403	0	0.287738	0.498359	0	0.219437	0	0.898503
mmu-miR-24-1-5p	24.8133	23.5354	32.5907	25.8964	25.4163	25.5561	19.3104	17.1978	15.2746
mmu-miR-24-2-5p	263.702	360.769	473.847	341.833	354.333	250.062	251.913	336.715	303.095
mmu-miR-24-3p	4782.65	2983.19	2711.62	3340.35	2966.23	3207.78	2688.76	2543.01	2303.46
mmu-miR-24-3p	4782.65	2983.19	2711.62	3340.35	2966.23	3207.78	2688.76	2543.01	2303.46
mmu-miR-25-3p	1887.76	1373.76	1352.33	1899.94	1589.27	1903.12	1973.83	1616.14	1677.21
mmu-miR-25-5p	15.0826	11.9289	15.0137	15.2501	12.9573	13.2633	16.2383	12.2195	18.8686
mmu-miR-26a-1-3p	4.86536	4.51364	5.49281	5.75476	3.98687	2.91145	4.38873	4.07317	8.98503
mmu-miR-26a-2-3p	6.32497	9.67208	7.32375	6.90572	9.46882	9.70485	5.48591	8.14633	8.08653
mmu-miR-26a-5p	188970	216373	203498	212527	197596	179134	184987	177345	183670
mmu-miR-26a-5p	188971	216374	203498	212529	197598	179136	184989	177347	183670
mmu-miR-26b-3p	28.2191	46.1036	46.5058	44.0239	48.8392	40.1134	39.718	40.2791	34.1431
mmu-miR-26b-5p	6691.33	5723.94	5402	6068.69	6363.05	6159.02	5988.42	6384.01	5267.03
mmu-miR-27a-3p	3194.59	2641.45	2630.69	2898.96	2488.8	2560.14	2006.53	2542.11	2407.99
mmu-miR-27a-5p	5.83843	2.90162	5.49281	4.02833	5.98031	3.23495	4.16929	4.97831	4.79202
mmu-miR-27b-3p	107303	87910.5	83446.1	88104.6	82574.6	95960.2	72286.6	80628.8	86298.5
mmu-miR-27b-5p	158.124	165.393	152.7	145.02	132.563	159.806	117.179	165.642	173.411
mmu-miR-2861	0	0	0	0	0	0	0	0	0
mmu-miR-28a-3p	64.2227	54.8085	56.7591	62.4392	57.3113	59.1996	72.1946	59.7398	50.6157
mmu-miR-28a-5p	225.266	267.272	273.908	262.417	297.022	217.389	287.242	226.287	268.053
mmu-miR-28b	0	0	0	0	0	0	0	0	0
mmu-miR-28c	218.455	260.824	265.852	248.606	289.547	211.889	277.587	217.688	260.566
mmu-miR-28c	0.486536	1.61201	2.9295	2.30191	1.99344	1.94097	1.75549	1.35772	0.898503
mmu-miR-290a-3p	0	0	0	0	0	0	0	0	0
mmu-miR-290a-5p	0	0	0	0	0	0	0	0	0
mmu-miR-290b-3p	0	0	0	0	0	0	0	0	0
mmu-miR-290b-5p	0	0	0	0	0	0	0	0	0
mmu-miR-291a-3p	0	0	0	0	0	0	0	0	0
mmu-miR-291a-5p	0	0	0	0	0	0	0.219437	0	0
mmu-miR-291b-3p	0	0	0	0	0	0	0	0	0
mmu-miR-291b-5p	0	0	0	0	0	0	0	0	0
mmu-miR-292a-3p	0	0	0	0	0	0	0	0	0
mmu-miR-292a-5p	0	0	0	0	0.498359	0	0	0	0
mmu-miR-292b-3p	0	0	0	0	0	0	0	0	0
mmu-miR-292b-5p	0	0	0.366188	0	0	0	0	0	0
mmu-miR-293-3p	0	0	0	0	0	0	0	0	0
mmu-miR-293-5p	0	0	0	0	0	0	0	0	0.299501
mmu-miR-294-3p	0	0	0	0	0	0	0	0	0
mmu-miR-294-5p	0	0	0	0	0	0	0	0	0
mmu-miR-295-3p	0	0.644805	0	0	0.498359	0.64699	0	0	0
mmu-miR-295-5p	0	0	0	0	0	0	0	0	0
mmu-miR-296-3p	12.1634	12.5737	20.8727	16.6888	18.4393	17.1452	28.9656	10.4092	25.7571
mmu-miR-296-5p	17.0288	36.4315	52.731	36.8305	38.872	38.4959	77.0222	46.1625	48.8187
mmu-miR-297a-3p	1.94614	2.57922	4.39425	3.7406	5.48195	2.58796	4.38873	4.52574	2.99501
mmu-miR-297a-3p	1.94614	2.57922	4.39425	3.7406	5.48195	2.58796	4.38873	4.52574	2.99501
mmu-miR-297a-3p	1.94614	2.57922	4.39425	3.7406	5.48195	2.58796	4.38873	4.52574	2.99501
mmu-miR-297a-3p	1.94614	2.57922	4.39425	3.7406	5.48195	2.58796	4.38873	4.52574	2.99501
mmu-miR-297a-5p	0.486536	0.967208	2.19713	1.15095	0.498359	0.970485	2.19437	0.905148	0.898503
mmu-miR-297a-5p	0.486536	0.967208	2.19713	1.15095	0.498359	0.970485	2.19437	0.905148	0.898503
mmu-miR-297a-5p	0.486536	0.967208	2.19713	1.15095	0.498359	0.970485	2.19437	0.905148	0.898503
mmu-miR-297a-5p	0.486536	0.967208	2.19713	1.15095	0.498359	0.970485	2.19437	0.905148	0.898503
mmu-miR-297b-3p	1.94614	2.57922	4.39425	3.7406	5.48195	2.58796	4.38873	4.52574	2.99501
mmu-miR-297b-3p	1.94614	2.57922	4.39425	3.7406	5.48195	2.58796	4.38873	4.52574	2.99501
mmu-miR-297b-3p	1.94614	2.57922	4.39425	3.7406	5.48195	2.58796	4.38873	4.52574	2.99501
mmu-miR-297b-3p	1.94614	2.57922	4.39425	3.7406	5.48195	2.58796	4.38873	4.52574	2.99501
mmu-miR-297b-5p	2.91921	2.90162	2.19713	2.58964	2.49179	3.88194	1.75549	3.62059	4.19301
mmu-miR-297c-3p	1.94614	2.57922	4.39425	3.7406	5.48195	2.58796	4.38873	4.52574	2.99501
mmu-miR-297c-3p	1.94614	2.57922	4.39425	3.7406	5.48195	2.58796	4.38873	4.52574	2.99501
mmu-miR-297c-3p	1.94614	2.57922	4.39425	3.7406	5.48195	2.58796	4.38873	4.52574	2.99501
mmu-miR-297c-3p	1.94614	2.57922	4.39425	3.7406	5.48195	2.58796	4.38873	4.52574	2.99501
mmu-miR-297c-5p	0	0.644805	1.09856	2.30191	0.498359	0.64699	0.219437	0.905148	1.79701
mmu-miR-298-3p	0.486536	1.61201	2.19713	1.43869	2.99015	0.970485	4.16929	3.62059	1.198
mmu-miR-298-5p	2524.15	3789.2	3851.93	7408.68	3893.18	5663.1	12939.7	3542.3	6291.32
mmu-miR-299a-3p	41.3555	55.1309	59.3224	57.2599	55.8162	56.9351	55.0786	60.1923	60.1997
mmu-miR-299a-5p	5.35189	8.38247	5.859	6.90572	8.4721	7.11689	7.68028	11.7669	5.69052
mmu-miR-299b-3p	41.3555	54.4861	58.9562	57.2599	55.8162	56.6116	53.3231	59.7398	59.9002
mmu-miR-299b-3p	0.486536	0.967208	0	0.287738	1.99344	0.64699	0.219437	0	0.599002
mmu-miR-299b-5p	5.35189	8.38247	5.859	6.90572	8.4721	7.11689	7.68028	11.3144	5.69052
mmu-miR-299b-5p	0	0	0	0	0	0	0	0	0
mmu-miR-29a-3p	19623.4	27476.4	32293.7	23881.7	24267.6	20031.8	17826.1	22043.1	19680.5
mmu-miR-29a-5p	46.2209	62.5461	73.9699	44.0239	52.826	37.5254	36.8653	59.7398	36.5391
mmu-miR-29b-1-5p	5.35189	6.12565	9.52088	10.0708	7.97374	6.1464	5.26648	7.69376	6.88852
mmu-miR-29b-2-5p	22.3806	31.5955	35.154	26.4719	35.3835	23.6151	21.2853	34.8482	17.9701
mmu-miR-29b-3p	1084.97	1414.38	1757.33	1293.1	1231.94	960.78	981.979	1068.53	990.15
mmu-miR-29b-3p	1087.41	1418.25	1764.66	1296.26	1239.92	961.103	985.49	1072.15	992.846
mmu-miR-29c-3p	2348.99	3276.9	3980.83	3071.03	3113.75	2421.04	2185.37	2839.45	2455.31
mmu-miR-29c-5p	36.0036	53.5189	53.0972	35.6795	43.3572	45.9363	31.8183	53.4037	41.0316
mmu-miR-300-3p	12515.6	15641.4	19546	17152.6	15875.7	15755.5	16337.5	15683.5	15812.8
mmu-miR-300-5p	15.5691	21.2786	16.4784	20.1417	21.9278	17.1452	22.602	24.439	11.6805
mmu-miR-301a-3p	2031.77	2947.41	3740.61	2970.32	2912.91	2677.57	2688.54	2884.71	2897.37
mmu-miR-301a-5p	1.94614	10.6393	10.2533	9.20762	11.4623	3.88194	11.8496	7.69376	8.98503
mmu-miR-301b-3p	56.4381	53.8413	77.2656	95.2413	76.2489	87.6671	88.8718	62.4552	84.4593
mmu-miR-301b-5p	0	0.322403	0	0.287738	0	0.323495	0.438873	0	0.599002
mmu-miR-302a-3p	0	0	0	0	0.498359	0	0.219437	0	0
mmu-miR-302a-5p	0	0	0	0	0	0	0	0	0
mmu-miR-302b-3p	0	0	0	0	0	0	0.219437	0.452574	0
mmu-miR-302b-5p	0	0	0	0	0	0	0	0	0
mmu-miR-302c-3p	0	0	0	0	0	0	0	0	0
mmu-miR-302c-5p	0	0	0	0	0	0	0	0	0
mmu-miR-302d-3p	0	0	0	0	0	0	0.219437	0.452574	0
mmu-miR-302d-5p	0	0	0	0	0	0	0	0	0
mmu-miR-3057-3p	0	0	0.366188	0	1.49508	0.64699	0.877746	1.35772	0.299501
mmu-miR-3057-5p	118.228	94.1416	142.081	151.638	108.642	159.806	148.12	115.859	125.79
mmu-miR-3058-3p	0.486536	0.322403	0.366188	0.863215	0.996718	0.323495	0.65831	0	1.198
mmu-miR-3058-5p	0.486536	0	0	0.287738	0	0	0.219437	0	0
mmu-miR-3059-3p	1.45961	0.967208	1.83094	0.287738	0.996718	0.64699	2.63324	0.452574	0.898503
mmu-miR-3059-5p	410.636	367.861	374.976	410.027	397.192	518.562	528.842	346.672	384.859
mmu-miR-3060-3p	28.2191	38.3659	40.6468	28.4861	29.4032	30.085	37.9625	36.6585	30.8486
mmu-miR-3060-5p	0	0	0	0	0	0	0	0	0
mmu-miR-3061-3p	70.5477	68.3494	82.7584	69.9204	86.2161	91.8725	74.389	86.8942	92.8453
mmu-miR-3061-5p	13.1365	11.9289	16.4784	15.2501	15.4491	13.5868	12.069	11.3144	17.6706
mmu-miR-3062-3p	0	0	0	0	0	0	0	0	0
mmu-miR-3062-5p	0	1.28961	0.366188	0.863215	1.49508	0.64699	0	0	0
mmu-miR-3063-3p	0	0	0	0	0	0	0	0	0
mmu-miR-3063-5p	0	0	0	0	0	0	0	0	0
mmu-miR-3064-3p	0	0	0.366188	0.575476	0.498359	0	1.31662	0	0.299501
mmu-miR-3064-5p	1.94614	1.28961	2.19713	2.01417	1.49508	3.23495	1.75549	3.62059	4.49252
mmu-miR-3065-3p	0	0	0	0	0	0	0	0	0
mmu-miR-3065-5p	0	0	0	0	0.996718	0	0	0	0
mmu-miR-3066-3p	0	0	0	0.575476	0.498359	0	0.877746	1.35772	0.898503
mmu-miR-3066-5p	5.83843	2.90162	5.12663	4.31607	5.48195	4.52893	3.07211	3.62059	6.28952
mmu-miR-3067-3p	0	0	0	0	0	0	0	0	0
mmu-miR-3067-5p	0	0.322403	0.732375	0	0	0	0	0.452574	0
mmu-miR-3068-3p	325.006	457.489	496.184	364.277	427.094	396.605	398.277	454.837	445.658
mmu-miR-3068-5p	39.4094	36.4315	46.1396	34.2408	36.3802	40.7604	39.0597	34.8482	29.0516
mmu-miR-3069-3p	5.35189	8.70487	11.718	4.60381	7.47538	7.11689	6.5831	8.14633	5.39102
mmu-miR-3069-5p	0.486536	4.19124	6.59138	3.7406	8.4721	3.88194	3.07211	6.78861	2.39601
mmu-miR-3070-2-3p	0.973072	0.644805	0.732375	2.30191	0.498359	1.94097	0.65831	1.35772	0.898503
mmu-miR-3070-3p	0.486536	0.644805	1.09856	0.863215	0.996718	0.323495	0.438873	0	1.79701
mmu-miR-3070-5p	0.973072	1.61201	0.732375	2.01417	0.996718	0.970485	2.4138	0	0.299501
mmu-miR-3070-5p	0.973072	1.61201	0.732375	2.01417	0.996718	0.970485	2.4138	0	0.299501
mmu-miR-3071-3p	0	0	0	0	0	0	0	0	0
mmu-miR-3071-5p	0	0	0	0	0	0	0	0	0.299501
mmu-miR-3072-3p	13.623	7.09286	9.52088	8.91988	8.97046	5.82291	5.48591	5.43089	6.28952
mmu-miR-3072-5p	0.486536	0.967208	0.732375	0	0	0.64699	0.65831	0	0.299501
mmu-miR-3073a-3p	0	0	0.366188	0	0.498359	0	0.219437	0	0
mmu-miR-3073a-5p	0	0	0	0	0	0	0	0	0
mmu-miR-3073b-3p	0	0	0	0	0	0	0	0	0
mmu-miR-3073b-5p	0	0	0	0	0	0.323495	0.65831	0	0
mmu-miR-3074-1-3p	1.94614	1.93442	4.76044	3.16512	2.49179	4.52893	4.8276	3.62059	5.09152
mmu-miR-3074-2-3p	0.486536	0	0.366188	0	0	0	0	0	0
mmu-miR-3074-5p	6.8115	8.06007	8.05613	10.9341	4.98359	10.3518	9.65521	10.8618	6.28952
mmu-miR-3074-5p	6.8115	8.06007	8.05613	10.9341	4.98359	10.3518	9.65521	10.8618	6.28952
mmu-miR-3075-3p	0	0	0	0	0	0	0	0	0
mmu-miR-3075-5p	0	0.322403	0.366188	0.287738	0	0	0	0	0.299501
mmu-miR-3076-3p	6.8115	8.06007	17.2108	8.34441	11.9606	11.9693	9.87464	9.05148	10.183
mmu-miR-3076-5p	0.973072	0.644805	1.83094	0.287738	0.498359	0	0.438873	0	0
mmu-miR-3077-3p	5.35189	4.83604	4.76044	4.31607	0.498359	0.970485	3.73042	2.26287	2.99501
mmu-miR-3077-5p	0	0	0	0	0.498359	0.323495	0.438873	0	0
mmu-miR-3078-3p	2.43268	0.644805	0.732375	0.287738	0.498359	0.64699	0.65831	0.452574	2.69551
mmu-miR-3078-5p	108.984	157.655	178.7	109.053	121.101	104.812	127.712	163.379	143.461
mmu-miR-3079-3p	0	0.322403	0	0	0.498359	0	0	0.452574	0
mmu-miR-3079-5p	0	0	0	0.287738	0	0.323495	0.877746	0.452574	0.299501
mmu-miR-3080-3p	0	1.28961	0.732375	0	0	0.323495	0.877746	1.35772	0
mmu-miR-3080-5p	0	0.644805	1.83094	2.01417	1.49508	0	1.31662	1.8103	2.09651
mmu-miR-3081-3p	7.78457	9.34968	14.6475	4.89155	6.97702	8.08737	5.70535	9.05148	6.88852
mmu-miR-3081-5p	0	0	0	0	0	0	0	0	0
mmu-miR-3082-3p	149.853	118.322	149.771	130.921	136.052	142.985	147.022	104.997	124.293
mmu-miR-3082-5p	0.486536	0	0.366188	1.15095	0	1.29398	0.438873	0.452574	0.599002
mmu-miR-3083-3p	2.43268	2.90162	3.66188	3.16512	1.49508	0	1.31662	0.905148	3.29451
mmu-miR-3083-5p	19.4614	37.7211	40.6468	30.788	29.9015	32.9965	23.4797	32.5853	34.7421
mmu-miR-3084-3p	35.5171	30.9507	35.5202	32.8022	26.413	39.7899	21.9437	18.103	27.2546
mmu-miR-3084-3p	35.5171	30.9507	35.5202	32.8022	26.413	39.7899	21.9437	18.103	27.2546
mmu-miR-3084-5p	3.89229	3.54643	3.66188	2.01417	2.99015	4.20543	4.16929	4.52574	3.89351
mmu-miR-3084-5p	3.89229	3.54643	3.66188	2.01417	2.99015	4.20543	4.16929	4.52574	3.89351
mmu-miR-3085-3p	49.6266	73.5078	94.1102	35.6795	91.1997	40.7604	30.7211	70.149	53.6107
mmu-miR-3085-5p	0.973072	1.28961	1.09856	1.43869	0	0	0.877746	0.905148	0.299501
mmu-miR-3086-3p	2.43268	0.644805	2.19713	2.30191	0.996718	1.61747	1.53606	0.905148	1.49751
mmu-miR-3086-5p	116.769	113.163	96.3074	130.058	109.141	142.338	125.298	98.2086	109.917
mmu-miR-3087-3p	14.1095	11.9289	11.718	14.3869	11.9606	10.6753	15.3606	14.9349	11.0815
mmu-miR-3087-5p	0	1.61201	4.02806	1.72643	0.996718	1.29398	3.07211	0.905148	2.39601
mmu-miR-3088-3p	0.973072	0.967208	3.29569	2.01417	2.49179	1.94097	0.877746	0.452574	1.198
mmu-miR-3088-5p	0	0	0	0	0	0	0	0.452574	0
mmu-miR-3089-3p	0.973072	3.22403	1.09856	2.30191	1.99344	2.26446	1.75549	1.35772	1.198
mmu-miR-3089-5p	0	0	0	0	0	0	0	0	0
mmu-miR-3090-3p	0	0	0	0	0	0	0	0	0
mmu-miR-3090-5p	0	0	0	0	0	0	0	0	0
mmu-miR-3091-3p	1.94614	0.967208	0.732375	0.863215	0.996718	0	0.438873	0.905148	0.299501
mmu-miR-3091-5p	0	0.322403	0	0	0	0	0	0	0
mmu-miR-3092-3p	0	0	0	0	0.498359	0	0	0	0
mmu-miR-3092-5p	0	0	0	0	0	0	0	0	0
mmu-miR-3093-3p	3.40575	3.54643	4.39425	3.45286	4.48523	4.52893	3.94986	2.71544	0.898503
mmu-miR-3093-5p	61.79	47.3932	63.7167	67.043	36.3802	56.2881	59.0284	38.4688	42.5291
mmu-miR-3094-3p	1.94614	0	0	0	0	0	0	0	0
mmu-miR-3094-5p	0	0.322403	3.66188	0.863215	0.498359	0.64699	0.65831	1.35772	1.79701
mmu-miR-3095-3p	1.94614	0	0.732375	0.863215	0	0.64699	0.438873	0	1.79701
mmu-miR-3095-5p	0	0.322403	0	0	0	0.323495	0.219437	0.905148	0
mmu-miR-3097-3p	0	1.61201	2.19713	0.575476	0.996718	2.58796	1.09718	2.26287	2.09651
mmu-miR-3097-5p	0.973072	0.322403	1.83094	0.287738	1.99344	0	0.877746	0.452574	2.39601
mmu-miR-3098-3p	0.973072	1.61201	1.83094	0.575476	1.99344	0.323495	1.09718	2.71544	0
mmu-miR-3098-5p	1.94614	1.93442	4.76044	1.15095	0.996718	1.61747	0.438873	1.35772	1.79701
mmu-miR-3099-3p	983.289	1186.12	1305.46	1632.34	1230.95	1299.16	2109	1010.6	2022.23
mmu-miR-3099-5p	0.486536	0	0.732375	0	0.498359	0.970485	0.877746	2.26287	0.599002
mmu-miR-30a-3p	1889.7	1641.35	1252	2094.45	1888.28	2113.39	2099.35	1767.75	2117.77
mmu-miR-30a-5p	63918.2	73142.5	81708.9	77484.4	77695.6	74326.8	65035.1	66576.8	77721.4
mmu-miR-30b-3p	52.5459	29.0162	46.1396	39.1324	35.3835	54.0236	37.5236	41.6368	44.3262
mmu-miR-30b-5p	1674.66	3321.07	3801.03	2225.37	2945.3	1727.46	1810.35	2943.54	2294.78
mmu-miR-30c-1-3p	244.727	206.015	220.445	269.035	236.72	284.999	218.778	188.271	256.972
mmu-miR-30c-2-3p	271.487	294.998	270.246	281.983	280.576	265.913	298.434	250.726	423.794
mmu-miR-30c-5p	11808.7	22222.9	22486.9	15514.6	19333.3	11868.7	13911.8	18789.1	15753.8
mmu-miR-30c-5p	11808.7	22222.9	22486.9	15514.8	19333.3	11868.7	13912.1	18789.1	15753.8
mmu-miR-30d-3p	280.731	304.993	319.316	273.064	310.976	301.821	260.91	317.707	333.345
mmu-miR-30d-5p	34664.7	39613.9	44567.6	38129.3	38360.2	35954.8	33238.3	35046.4	37374.1
mmu-miR-30e-3p	3898.12	3060.25	2290.87	4079.55	3357.44	4036.25	3555.53	3236.36	3608.69
mmu-miR-30e-5p	22484.3	32160.6	35127.6	27163.6	29113.1	22997.9	22373.3	28366.4	26973.1
mmu-miR-30f	1.94614	1.93442	1.46475	3.16512	1.49508	0	1.53606	0	0.599002
mmu-miR-3100-3p	0	0	0	0	0	0	0	0	0
mmu-miR-3100-5p	0.973072	0	0	0	0.498359	0	0.219437	0	0
mmu-miR-3101-3p	0.486536	0	0	0	0	0.323495	0	0	0
mmu-miR-3101-5p	1.45961	0	1.09856	1.43869	0.996718	0.323495	1.31662	0.452574	0.299501
mmu-miR-3102-3p	76.3861	86.7263	118.279	75.0997	82.2292	88.9611	82.5081	100.019	96.4393
mmu-miR-3102-3p.2-3p	28.7056	41.59	59.3224	49.7787	49.8359	54.9941	39.718	35.7533	41.0316
mmu-miR-3102-5p	0.486536	0.322403	0	0	0.498359	1.61747	0.65831	0.452574	0.299501
mmu-miR-3102-5p.2-5p	15.5691	14.8305	16.8446	15.8256	9.46882	15.5278	16.0189	9.95663	30.5491
mmu-miR-3103-3p	23.3537	24.5026	15.3799	18.703	14.4524	15.8512	32.696	17.1978	13.777
mmu-miR-3103-5p	1.94614	4.19124	2.19713	3.7406	3.48851	1.61747	2.4138	2.26287	3.29451
mmu-miR-3104-3p	3.89229	4.51364	8.42232	4.89155	3.48851	2.58796	6.14422	4.97831	3.89351
mmu-miR-3104-5p	0	0.322403	0.366188	0	0.498359	0	0.438873	0	0
mmu-miR-3105-3p	6.8115	3.22403	2.56331	3.16512	0.996718	0.970485	0.65831	1.8103	3.59401
mmu-miR-3105-5p	0	0	0	0	0	0	0	0	0
mmu-miR-3106-3p	0.486536	0	0	0	0	0	0	0.452574	0
mmu-miR-3106-5p	7.78457	7.73767	6.95757	5.75476	8.4721	4.52893	2.4138	6.33604	3.59401
mmu-miR-3108-3p	0	0	0	0	0	0	0	0	0
mmu-miR-3108-5p	0	1.28961	0	0.575476	0	0.64699	0	0	0.299501
mmu-miR-3109-3p	0.486536	0.322403	0	0	0.498359	0.970485	0	0.452574	0
mmu-miR-3109-5p	0	0	0	0	0.996718	0	0	0	0
mmu-miR-3110-3p	0	0	0.366188	0	0	0	0	0	0.599002
mmu-miR-3110-5p	0	0	0	0	0	0	0.219437	0	0
mmu-miR-3112-3p	0	0	0	0	0.996718	0	0.219437	0	0
mmu-miR-3112-5p	0	0	0	0	0	0	0	0	0.299501
mmu-miR-3113-3p	0	0	0	0	0	0	0	0	0
mmu-miR-3113-5p	0	0	0	0	0	0	0	0.452574	0
mmu-miR-31-3p	3.89229	3.86883	4.02806	2.01417	0.996718	3.23495	1.31662	1.35772	1.79701
mmu-miR-3154	0	0.322403	0.366188	0.863215	0	0	0	0	0
mmu-miR-31-5p	1052.86	1357.96	1139.21	911.842	1041.57	889.934	662.04	1045.9	952.413
mmu-miR-320-3p	787.701	598.379	817.697	717.331	650.857	781.887	1471.98	1059.02	754.144
mmu-miR-320-5p	0	0.322403	0	0	0	0	0.219437	0	0
mmu-miR-322-3p	98.7668	152.174	161.489	143.006	165.954	128.751	136.928	153.875	144.06
mmu-miR-322-5p	368.794	489.085	431.735	440.527	458.49	426.043	367.117	477.013	417.804
mmu-miR-323-3p	737.102	855.979	966.369	634.175	838.24	611.405	758.592	931.397	724.194
mmu-miR-323-5p	83.1976	51.5844	56.7591	61.2882	56.3146	59.5231	97.8687	61.5501	69.7837
mmu-miR-32-3p	0	1.61201	3.66188	3.45286	3.98687	1.94097	2.85268	0.905148	4.19301
mmu-miR-324-3p	151.313	235.032	276.105	171.78	222.766	208.654	196.176	229.455	176.706
mmu-miR-324-5p	183.424	186.026	254.867	180.987	210.307	204.772	154.922	194.607	134.176
mmu-miR-325-3p	45.2478	63.8357	62.2519	68.1939	53.8228	43.3483	65.831	48.878	57.8037
mmu-miR-325-5p	37.9498	45.4588	64.0828	58.4109	45.849	55.3176	49.5927	50.6883	49.1182
mmu-miR-32-5p	26.2729	24.1802	25.2669	31.0757	32.8917	27.1736	24.3575	30.3225	34.1431
mmu-miR-326-3p	351.279	475.222	783.275	472.178	525.27	371.049	414.735	455.742	448.353
mmu-miR-326-5p	0	0	0	0	0	0	0	0	0
mmu-miR-327	0	0	0	0	0	0	0	0	0
mmu-miR-328-3p	5032.73	6651.17	7673.83	6199.61	6125.33	6021.21	6325.48	5943.2	5376.64
mmu-miR-328-5p	0	0	0.366188	0	0.498359	0	0	0	0
mmu-miR-329-3p	72.4938	78.3439	113.518	59.8495	67.2785	53.7002	70.6586	64.2655	64.6922
mmu-miR-329-5p	337.656	430.73	552.211	432.758	445.034	373.96	425.049	447.143	417.504
mmu-miR-330-3p	636.389	618.691	905.948	701.506	583.578	637.285	689.909	569.791	533.411
mmu-miR-330-5p	2927.49	3293.02	3801.39	3312.73	3437.18	3310.65	3187.54	3448.61	3170.82
mmu-miR-331-3p	152.772	254.698	412.327	196.813	280.576	219.006	149.875	235.791	215.341
mmu-miR-331-5p	18.9749	15.1529	22.3374	19.2785	19.436	15.5278	19.9687	14.4824	18.8686
mmu-miR-33-3p	5.83843	5.15844	12.0842	5.46703	7.47538	7.44038	4.38873	6.33604	5.99002
mmu-miR-335-3p	1704.82	2139.79	1864.99	2353.7	2125	2282.9	2420.6	1869.58	1873.38
mmu-miR-335-5p	2318.83	2502.17	2812.69	2804.58	2306.4	1918.97	3018.35	2371.94	1851.22
mmu-miR-33-5p	95.8475	124.125	149.405	109.341	137.049	98.6659	112.132	114.049	121.597
mmu-miR-337-3p	85.1438	120.901	132.194	111.067	107.646	87.6671	134.515	109.07	119.201
mmu-miR-337-5p	491.401	641.259	588.097	533.467	567.631	504.976	503.826	691.986	552.579
mmu-miR-338-3p	3808.6	4099.67	4955.62	5900.36	4275.92	3850.88	4792.27	4153.27	4242.13
mmu-miR-338-5p	422.8	406.872	511.93	524.834	397.192	479.419	528.623	458.91	482.496
mmu-miR-339-3p	52.0593	81.2455	117.18	56.6844	71.2653	60.4935	41.2541	57.9295	56.9052
mmu-miR-339-5p	79.3053	82.5351	130.363	77.977	78.2423	73.7568	71.5363	88.2519	72.4793
mmu-miR-340-3p	278.785	428.473	309.062	329.46	345.861	284.029	332.666	387.403	337.837
mmu-miR-340-5p	4979.21	6241.72	6988.33	6291.97	6720.37	6410.37	5962.75	6813.05	6128.69
mmu-miR-341-3p	4372.98	5006.91	6206.88	5925.97	5174.46	5308.55	5467.26	5167.49	4846.83
mmu-miR-341-5p	28.2191	21.9234	30.0274	29.9248	21.4294	22.6446	24.3575	20.3658	19.1681
mmu-miR-342-3p	1583.19	2039.52	2279.88	2176.16	2141.95	1784.4	2065.34	1709.82	1922.8
mmu-miR-342-5p	135.743	161.524	138.419	146.171	114.623	127.133	207.587	148.444	205.458
mmu-miR-343	0	0	0	0	0	0	0	0	0
mmu-miR-344-3p	339.115	556.467	750.318	755.6	667.801	602.347	715.363	567.98	622.962
mmu-miR-344-3p	339.115	556.467	750.318	755.6	667.801	602.347	715.583	567.98	622.962
mmu-miR-344-5p	0	0	0	0.287738	0	0	0	0.452574	0.299501
mmu-miR-344-5p	0	0	0	0.287738	0	0	0	0.452574	0.299501
mmu-miR-344b-3p	290.462	395.266	428.806	483.112	420.615	401.781	511.287	389.666	421.098
mmu-miR-344b-5p	0	0	0	0	0	0	0	0	0
mmu-miR-344c-3p	59.8439	82.5351	80.9275	80.8544	72.262	65.0225	92.6022	77.3902	71.2812
mmu-miR-344c-5p	0	0	0	0	0	0	0.219437	0	0
mmu-miR-344d-1-5p	0	0.322403	0.732375	0	0	0.970485	0.877746	0.452574	0
mmu-miR-344d-2-5p	0	0.967208	0.732375	1.15095	0	0.323495	0.65831	0	0
mmu-miR-344d-3-5p	101.199	101.557	79.0965	120.275	64.7867	87.6671	96.7715	84.1788	104.825
mmu-miR-344d-3p	3707.89	3459.38	3179.61	3171.45	2549.11	3389.58	3416.85	3133.17	2802.43
mmu-miR-344d-3p	3705.46	3456.8	3177.04	3169.15	2546.12	3386.02	3412.68	3130	2800.93
mmu-miR-344d-3p	3705.46	3456.8	3177.04	3169.15	2546.12	3386.02	3412.68	3130	2800.93
mmu-miR-344e-3p	9.24418	11.2841	5.49281	10.6463	5.98031	3.88194	16.0189	10.4092	6.28952
mmu-miR-344e-5p	0	0.322403	0.732375	0.575476	0	0.323495	0.438873	0.452574	0.599002
mmu-miR-344e-5p	0	0.322403	0	0.575476	0	0.323495	0	0	0.599002
mmu-miR-344e-5p	0	0.322403	0	0.575476	0	0.323495	0	0	0.599002
mmu-miR-344f-3p	40.3825	26.7594	34.7878	32.8022	20.4327	30.085	32.9155	28.0596	23.3611
mmu-miR-344f-5p	3.40575	7.73767	12.0842	12.3727	5.98031	3.88194	9.43577	8.14633	5.39102
mmu-miR-344g-3p	1.94614	2.57922	3.29569	3.16512	0.498359	2.26446	1.09718	3.16802	1.49751
mmu-miR-344g-5p	0	1.28961	1.46475	0	0	0.323495	0.219437	0	0.299501
mmu-miR-344h-3p	0	1.28961	1.83094	0	0.498359	0.970485	1.97493	0.452574	0.299501
mmu-miR-344h-3p	0	1.28961	1.83094	0	0.498359	0.970485	1.97493	0.452574	0.299501
mmu-miR-344h-5p	0	0.322403	0.732375	0.575476	0	0.323495	0.438873	0.452574	0.599002
mmu-miR-344h-5p	0	0.322403	0	0.575476	0	0.323495	0	0	0.599002
mmu-miR-344h-5p	0	0.322403	0	0.575476	0	0.323495	0	0	0.599002
mmu-miR-344i	0	0.644805	0	0.575476	0	0.323495	0.219437	0	0
mmu-miR-345-3p	326.952	241.802	306.865	337.517	224.76	269.795	400.691	300.057	158.137
mmu-miR-345-5p	80.7649	91.5624	113.884	75.3874	87.2128	74.7273	76.8028	91.42	59.6007
mmu-miR-346-3p	0.486536	0	0.732375	0.575476	0.498359	0.323495	0.65831	0.905148	1.79701
mmu-miR-346-5p	91.4687	94.7864	102.166	92.6517	81.7309	97.0485	98.0881	77.3902	76.6723
mmu-miR-3470a	72.9804	9.99448	20.1403	26.1842	32.3933	22.3211	12.5079	32.5853	18.8686
mmu-miR-3470b	125.04	19.989	43.9425	40.5711	59.3047	37.5254	21.0659	33.9431	44.0267
mmu-miR-3471	1.45961	0	0.366188	1.15095	0.996718	0	0.219437	0.452574	0
mmu-miR-3471	1.45961	0	0.366188	1.15095	0.996718	0.323495	0.219437	0.452574	0
mmu-miR-3472	1.45961	0.322403	0	1.15095	0.996718	1.29398	0.438873	0.452574	0.599002
mmu-miR-3473a	28.2191	12.2513	12.4504	11.2218	23.9212	7.11689	1.31662	15.3875	7.48753
mmu-miR-3473b	4.37882	5.48085	5.49281	3.7406	3.98687	2.58796	0.65831	6.33604	3.29451
mmu-miR-3473c	0	0	0	0	0	0	0	0	0
mmu-miR-3473d	3.89229	7.73767	3.66188	5.17929	4.98359	6.1464	3.94986	5.43089	6.58902
mmu-miR-3473e	3.40575	2.25682	3.66188	0.863215	0.996718	0.970485	0.65831	3.16802	1.79701
mmu-miR-3473f	0.973072	0.322403	0	0	0	0.323495	0	0	0.299501
mmu-miR-3473g	2.43268	1.61201	4.76044	3.45286	3.48851	2.58796	1.75549	0.905148	3.89351
mmu-miR-3474	0.486536	0.322403	0	0	0.498359	0	0	0	0
mmu-miR-3475-3p	124.067	260.179	221.177	166.6	221.77	164.659	205.831	206.826	192.28
mmu-miR-3475-5p	0	0	0	0	0	0	0.438873	0	0
mmu-miR-34a-3p	0	0	0.732375	0.287738	0.996718	0	0	0	0
mmu-miR-34a-5p	37.9498	31.5955	49.8015	46.9013	43.3572	32.673	38.6208	41.1842	35.3411
mmu-miR-34b-3p	421.827	39.6555	221.91	105.6	12.9573	25.8796	19.7493	17.6504	14.6756
mmu-miR-34b-5p	362.469	42.5572	228.135	138.402	21.4294	25.8796	22.602	20.8184	19.1681
mmu-miR-34c-3p	110.93	9.99448	47.9706	22.1558	2.99015	9.70485	6.36366	4.07317	4.19301
mmu-miR-34c-5p	9064.65	1259.31	7155.67	3383.51	604.509	709.424	606.303	715.067	609.185
mmu-miR-350-3p	13.1365	19.6666	29.6612	15.8256	18.4393	21.0272	15.7994	18.103	20.9651
mmu-miR-350-5p	57.8978	51.262	66.28	60.1373	60.3014	54.6706	57.4924	52.046	52.7122
mmu-miR-351-3p	0.973072	1.28961	0.366188	1.43869	0	1.61747	0.438873	0.452574	0
mmu-miR-351-5p	1671.74	1727.43	1919.56	1612.2	1550.89	2013.11	1694.05	1575.41	1448.99
mmu-miR-3535	54.0055	36.4315	37.7173	36.8305	33.39	41.0839	50.6898	37.1111	57.8037
mmu-miR-3544-3p	0	0	0	0.863215	1.49508	0.970485	1.53606	0	0.599002
mmu-miR-3544-5p	0	0	0	0	0	0.64699	1.53606	0	0.299501
mmu-miR-3547-3p	1.94614	7.41526	10.6194	6.90572	9.96718	7.76388	13.3856	4.97831	7.48753
mmu-miR-3547-5p	0	0	0	0.575476	0.498359	0.323495	0.219437	0	0
mmu-miR-3552	93.9014	105.426	117.912	117.109	63.7899	43.9953	122.884	72.8644	61.6972
mmu-miR-3569-3p	0.486536	0.644805	0.366188	0.287738	0.498359	0.64699	0.65831	0	0.299501
mmu-miR-3569-5p	0	0	0	0	0.498359	0	0	0	0
mmu-miR-3572-3p	5.83843	5.15844	4.02806	4.89155	5.48195	3.55844	3.51098	2.26287	2.39601
mmu-miR-3572-5p	0.486536	0.967208	0.366188	0	0.996718	0	0	0	0.299501
mmu-miR-361-3p	293.381	404.615	447.115	274.79	388.72	333.523	327.619	382.425	350.716
mmu-miR-361-5p	959.449	866.296	885.442	1055.71	861.663	903.845	931.947	758.967	757.139
mmu-miR-3618-3p	0	0	0	0	0	0	0	0	0
mmu-miR-3618-5p	0	0	0	0	0	0	0	0	0
mmu-miR-3620-3p	0	0	0	0	0	0	0	0	0
mmu-miR-3620-5p	0	0	0	0	0	0	0	0	0
mmu-miR-362-3p	18.0018	28.6938	35.8864	26.7597	27.4097	20.7037	17.9938	20.3658	17.3711
mmu-miR-362-5p	5.35189	6.12565	8.42232	8.91988	6.47867	5.49941	10.3135	6.33604	4.79202
mmu-miR-363-3p	4.37882	1.93442	6.22519	5.46703	3.98687	1.61747	7.68028	1.35772	3.89351
mmu-miR-363-5p	0.973072	0	0.366188	0.575476	0	0	0	0	0.299501
mmu-miR-365-1-5p	0	0	0	0.287738	0.498359	0.64699	0.877746	0.452574	0
mmu-miR-365-2-5p	0.973072	3.22403	1.46475	0.863215	0.498359	1.29398	1.31662	0.905148	3.89351
mmu-miR-365-3p	61.3035	63.8357	90.0822	75.9629	58.8064	59.1996	90.6273	50.2357	93.1448
mmu-miR-365-3p	61.3035	63.8357	90.0822	75.9629	58.8064	59.1996	90.6273	50.2357	93.1448
mmu-miR-367-3p	0	0	0	0	0	0	0	0	0
mmu-miR-367-5p	0	0	0	0	0	0	0	0	0
mmu-miR-369-3p	2034.21	2495.07	1558.13	2479.44	2695.12	1928.03	2304.74	2470.6	1944.96
mmu-miR-369-5p	3817.85	3979.74	2391.21	3648.81	3509.94	3355.94	4167.98	3472.15	3351.42
mmu-miR-370-3p	1695.09	1546.89	1596.58	1411.36	1577.31	1299.8	1513.45	1334.19	1117.74
mmu-miR-370-5p	100.713	101.234	82.7584	115.383	115.121	109.018	134.734	126.721	97.3378
mmu-miR-374b-3p	0	0	0	0	0	0	0	0	0
mmu-miR-374b-5p	88.5495	83.1799	111.687	103.01	71.2653	91.8725	82.5081	74.2221	59.0017
mmu-miR-374c-3p	35.0306	52.2292	39.1821	48.0523	61.2981	52.7297	34.4515	49.3306	47.0217
mmu-miR-374c-3p	0	0	0	0.287738	0	0	0	0	0
mmu-miR-374c-5p	88.5495	83.1799	111.687	103.01	71.2653	91.8725	82.5081	74.2221	59.0017
mmu-miR-374c-5p	0	0	0	0	0	0	0	0	0
mmu-miR-375-3p	2720.22	668.341	985.045	1129.95	542.214	771.535	279.562	427.682	374.676
mmu-miR-375-5p	0	0	0	0	0	0	0	0	0
mmu-miR-376a-3p	332.79	454.265	572.351	460.381	405.664	288.234	350.879	381.52	323.761
mmu-miR-376a-5p	152.286	376.566	487.762	229.615	350.845	225.476	183.668	393.739	283.328
mmu-miR-376b-3p	1329.7	1890.89	2167.46	1798.36	1682.46	1291.39	1544.17	1324.68	1546.02
mmu-miR-376b-5p	1793.86	2149.78	1511.26	1883.82	1970.51	1500.05	1773.27	1748.75	1569.98
mmu-miR-376c-3p	199.966	283.07	262.557	225.874	247.684	179.54	238.089	252.536	230.316
mmu-miR-376c-5p	10.7038	11.6065	12.0842	7.19345	11.9606	9.38135	7.46084	9.95663	7.18802
mmu-miR-377-3p	46.2209	45.4588	49.8015	52.0806	35.8818	34.614	46.5205	47.5203	43.7272
mmu-miR-377-5p	67.6285	71.251	74.7023	56.6844	74.7538	68.5809	51.787	82.3685	80.8653
mmu-miR-378a-3p	3964.78	4233.47	5622.45	4581.94	4284.89	4166.94	5313.66	4854.76	5267.62
mmu-miR-378a-5p	17.5153	20.3114	22.7036	17.2643	22.4262	21.3507	13.6051	19.4607	22.1631
mmu-miR-378b	58.8708	73.5078	82.3922	94.0904	69.2719	70.5219	86.458	83.2736	64.0932
mmu-miR-378c	742.454	690.587	897.16	760.78	751.027	727.863	734.893	711.899	897.305
mmu-miR-378d	68.6015	64.1581	101.068	73.0855	68.7735	65.0225	99.1853	91.42	86.8553
mmu-miR-379-3p	411.123	385.271	387.427	429.881	387.225	405.339	376.114	403.696	342.629
mmu-miR-379-5p	724.452	795.69	680.01	698.053	919.472	670.928	996.681	1034.58	362.696
mmu-miR-380-3p	1347.22	2097.23	1775.64	2066.54	1741.76	1269.07	2346.22	1880.45	1806.89
mmu-miR-380-5p	26.2729	24.1802	32.5907	27.0474	37.8753	31.7025	37.9625	33.4905	32.9451
mmu-miR-381-3p	12439.7	16048.9	19509	19679.3	16206.6	18073.3	18174.8	16394.9	16030.5
mmu-miR-381-5p	3.89229	8.06007	7.32375	6.33024	6.97702	7.76388	9.21634	11.7669	10.183
mmu-miR-382-3p	103.632	167.327	171.376	128.619	197.848	155.601	140.001	165.19	115.008
mmu-miR-382-5p	909.822	786.34	755.811	936.3	1038.58	982.13	1286.12	1001.55	707.122
mmu-miR-383-3p	5.35189	7.41526	9.88707	2.87738	8.4721	6.79339	11.4107	8.14633	8.38603
mmu-miR-383-5p	1918.41	3418.44	2539.15	2942.7	3044.97	2627.43	4274.84	3180.24	4131.92
mmu-miR-384-3p	644.173	630.297	721.023	782.936	621.454	534.09	733.138	538.563	530.416
mmu-miR-384-5p	2078.48	2346.12	2018.06	2465.05	2307.9	2108.22	2360.7	1979.56	1791.32
mmu-miR-3960	0.973072	0	0	0.287738	0.498359	0.323495	0.438873	0	0.299501
mmu-miR-3961	0	0	0	0	0	0	0	0	0
mmu-miR-3962	3.89229	0.644805	0.732375	4.31607	0	0.64699	1.75549	0.905148	0.898503
mmu-miR-3963	2.43268	1.61201	2.56331	2.01417	2.49179	1.29398	1.31662	1.35772	4.19301
mmu-miR-3964	0.973072	2.25682	1.09856	0.863215	0.498359	1.61747	0.65831	1.8103	0.299501
mmu-miR-3965	0	0	0	0	0	0	0	0	0
mmu-miR-3966	0.486536	0.322403	0.366188	0.575476	0.498359	0.323495	0	0.452574	0
mmu-miR-3967	0	0	0	0	0	0	0	0	0
mmu-miR-3968	183.424	89.3056	134.757	96.3923	78.7407	81.5207	102.916	59.7398	77.8703
mmu-miR-3969	0.486536	0.644805	1.46475	0.575476	0	0.970485	0.65831	0.905148	0.898503
mmu-miR-3970	15.5691	15.7977	10.2533	20.7171	22.9245	18.7627	16.4577	23.0813	25.1581
mmu-miR-3971	0	0	0	0	0	0	0	0	0
mmu-miR-409-3p	7279.06	7696.4	6548.17	7385.66	6250.92	7158.62	7709.03	7994.27	6895.41
mmu-miR-409-5p	62.7631	40.3003	46.872	64.7411	34.3868	39.7899	76.3639	33.0379	50.3162
mmu-miR-410-3p	27542.3	30576.7	38145	40375.4	34407.2	36237.3	42926.8	33367.8	35928.7
mmu-miR-410-5p	5.83843	9.02728	4.76044	7.48119	3.48851	4.20543	8.33859	5.43089	7.48753
mmu-miR-411-3p	713.748	912.077	777.783	759.053	933.925	743.068	624.078	852.649	674.476
mmu-miR-411-5p	31650.6	39488.9	36809.5	37683.3	39136.1	39532.4	36545.4	40312.6	38389.1
mmu-miR-412-3p	15.0826	9.02728	15.0137	14.6746	14.4524	12.2928	18.4327	14.4824	8.08653
mmu-miR-412-5p	140.609	137.988	94.8426	137.539	163.96	125.193	224.922	208.184	153.045
mmu-miR-421-3p	2285.75	2449.29	2190.17	2262.49	2305.41	2473.12	2381.98	2481.01	2295.68
mmu-miR-421-5p	5.83843	6.44805	11.3518	5.17929	10.4655	5.17592	5.70535	8.14633	5.39102
mmu-miR-423-3p	1800.18	1766.44	1877.44	1687.58	1380.45	1436.96	1888.25	1708.47	1502.9
mmu-miR-423-5p	603.304	988.487	1069.27	900.333	696.207	604.612	356.804	304.582	1583.46
mmu-miR-425-3p	80.2784	110.584	80.9275	59.5618	136.052	58.5526	57.9312	106.355	67.6872
mmu-miR-425-5p	1520.42	1558.17	1636.86	1603.28	1501.06	1486.78	1278.44	1388.5	1244.13
mmu-miR-429-3p	17.5153	3.86883	9.15469	13.5237	7.47538	7.76388	31.8183	12.2195	7.18802
mmu-miR-429-5p	0	0	0	0	0	0	0	0	0
mmu-miR-431-3p	461.236	531.32	638.265	598.783	470.451	513.71	726.554	509.598	512.147
mmu-miR-431-5p	607.197	1204.82	991.636	861.488	822.292	832.029	949.941	1008.79	1034.78
mmu-miR-432	0	0	0	0	0	0	0	0	0
mmu-miR-433-3p	3102.64	2818.12	3040.82	3315.32	3118.23	3730.22	3885.12	3126.83	2805.73
mmu-miR-433-5p	108.497	145.726	152.7	135.525	140.537	109.341	173.574	152.065	167.122
mmu-miR-434-3p	47918.4	109336	132482	71672.7	105438	68651.8	58886.7	109466	90298.7
mmu-miR-434-5p	8807.27	10488.7	12415.2	9737.64	9704.54	8549	9625.15	9750.25	9954.52
mmu-miR-448-3p	783.323	167.005	467.622	378.376	123.593	97.372	160.189	159.306	138.369
mmu-miR-448-5p	59.8439	58.3549	59.3224	64.4534	52.3277	41.4073	58.809	50.6883	44.3262
mmu-miR-449a-3p	0.486536	0	0	0	0	0	0	0	0
mmu-miR-449a-5p	11.1903	21.9234	14.6475	18.703	18.9376	16.1747	23.9186	23.0813	47.3212
mmu-miR-449b	0.486536	0	0	0	0	0	0	0	0
mmu-miR-449c-3p	0	0	0	0	0	0	0	0	0
mmu-miR-449c-5p	0	0.644805	0.366188	0.287738	0.498359	2.26446	0.877746	0	0.299501
mmu-miR-450a-1-3p	0	0	0	0.287738	0	0.323495	0.219437	0.452574	0.299501
mmu-miR-450a-2-3p	0	0	0	0	0	0	0	0	0.299501
mmu-miR-450a-5p	13.1365	21.2786	18.6756	15.5379	19.9344	11.9693	16.2383	19.4607	12.579
mmu-miR-450a-5p	13.1365	21.2786	18.6756	15.5379	19.9344	11.9693	16.2383	19.4607	12.579
mmu-miR-450b-3p	0.486536	1.28961	1.09856	0.287738	0.996718	0.970485	1.09718	1.35772	0.299501
mmu-miR-450b-5p	24.3268	28.6938	22.7036	30.5002	19.436	23.6151	16.4577	31.2276	23.0616
mmu-miR-451a	187.803	155.076	217.149	187.318	183.396	316.055	213.731	188.271	176.107
mmu-miR-451b	0	0	0	0	0	0	0	0	0
mmu-miR-452-3p	0	0	0	0	0	0	0	0	0
mmu-miR-452-5p	0	0	0	0	0	0	0	0	0
mmu-miR-453	0	0	0	0	0	0	0	0	0
mmu-miR-455-3p	52.0593	49.65	71.7728	46.0381	55.8162	47.2303	37.3042	56.5718	41.0316
mmu-miR-455-5p	13.623	21.9234	32.2245	22.1558	30.3999	21.0272	17.5549	24.439	24.2596
mmu-miR-463-3p	0	0	0	0	0	0	0	0	0
mmu-miR-463-5p	0.486536	0	0.366188	0	0.996718	0	0	0	0
mmu-miR-465a-3p	0	0.644805	0.732375	0.287738	0.498359	0	0	0	0
mmu-miR-465a-3p	0	0.644805	0.732375	0.287738	0.498359	0	0	0	0
mmu-miR-465a-3p	0	0.644805	0.732375	0.287738	0.498359	0	0	0	0
mmu-miR-465a-3p	0	0.644805	0.732375	0.287738	0.498359	0	0	0	0
mmu-miR-465a-3p	0	0.644805	0.732375	0.287738	0.498359	0	0	0	0
mmu-miR-465a-5p	0	0.322403	0.732375	0	0	0	0	0	0
mmu-miR-465b-3p	0	0.644805	0.732375	0.287738	0.498359	0	0	0	0
mmu-miR-465b-3p	0	0.644805	0.732375	0.287738	0.498359	0	0	0	0
mmu-miR-465b-3p	0	0.644805	0.732375	0.287738	0.498359	0	0	0	0
mmu-miR-465b-3p	0	0.644805	0.732375	0.287738	0.498359	0	0	0	0
mmu-miR-465b-3p	0	0.644805	0.732375	0.287738	0.498359	0	0	0	0
mmu-miR-465b-5p	0	0	0.732375	0	0	0	0	0	0
mmu-miR-465b-5p	0	0	0.732375	0	0	0	0	0	0
mmu-miR-465c-3p	0	0.644805	0.732375	0.287738	0.498359	0	0	0	0
mmu-miR-465c-3p	0	0.644805	0.732375	0.287738	0.498359	0	0	0	0
mmu-miR-465c-3p	0	0.644805	0.732375	0.287738	0.498359	0	0	0	0
mmu-miR-465c-3p	0	0.644805	0.732375	0.287738	0.498359	0	0	0	0
mmu-miR-465c-3p	0	0.644805	0.732375	0.287738	0.498359	0	0	0	0
mmu-miR-465c-5p	0	0	0	0.863215	0	0	0.438873	0	0
mmu-miR-465c-5p	0	0	0	0.863215	0	0	0.438873	0	0
mmu-miR-465d-3p	0	0	0	0	0	0	0	0	0
mmu-miR-465d-5p	0	0	0	0	0	0	0	0	0
mmu-miR-466a-3p	18.9749	22.8906	25.9993	27.3351	11.9606	24.2621	34.8904	31.2276	22.4626
mmu-miR-466a-3p	20.921	24.5026	26.3655	29.3493	13.954	25.2326	35.9876	34.8482	23.6606
mmu-miR-466a-3p	20.921	24.5026	26.3655	29.3493	13.954	25.2326	35.9876	34.8482	23.6606
mmu-miR-466a-3p	20.921	24.5026	26.3655	29.3493	13.954	25.2326	35.9876	34.8482	23.6606
mmu-miR-466a-3p	20.921	24.5026	26.3655	29.3493	13.954	25.2326	35.9876	34.8482	23.6606
mmu-miR-466a-3p	20.921	24.5026	26.3655	29.3493	13.954	25.2326	35.9876	34.8482	23.6606
mmu-miR-466a-3p	20.921	24.5026	26.3655	29.3493	13.954	25.2326	35.9876	34.8482	23.6606
mmu-miR-466a-3p	20.921	24.5026	26.3655	29.3493	13.954	25.2326	35.9876	34.8482	23.6606
mmu-miR-466a-3p	20.921	24.5026	26.3655	29.3493	13.954	25.2326	35.9876	34.8482	23.6606
mmu-miR-466a-3p	20.921	24.5026	26.3655	29.3493	13.954	25.2326	35.9876	34.8482	23.6606
mmu-miR-466a-3p	20.921	24.5026	26.3655	29.3493	13.954	25.2326	35.9876	34.8482	23.6606
mmu-miR-466a-3p	20.921	24.5026	26.3655	29.3493	13.954	25.2326	35.9876	34.8482	23.6606
mmu-miR-466a-3p	20.921	24.5026	26.3655	29.0616	13.954	25.2326	35.9876	34.8482	23.6606
mmu-miR-466a-5p	1.45961	0.322403	0.366188	0.575476	1.99344	0	0.877746	1.35772	0
mmu-miR-466b-3p	18.9749	22.8906	25.9993	27.0474	11.9606	24.2621	34.8904	31.2276	22.4626
mmu-miR-466b-3p	20.921	24.5026	26.3655	29.0616	13.954	25.2326	35.9876	34.8482	23.6606
mmu-miR-466b-3p	20.921	24.5026	26.3655	29.0616	13.954	25.2326	35.9876	34.8482	23.6606
mmu-miR-466b-3p	17.0288	21.2786	18.6756	26.1842	8.4721	19.7332	30.9406	26.7019	16.4726
mmu-miR-466b-3p	20.921	24.5026	26.3655	29.0616	13.954	25.2326	35.9876	34.8482	23.6606
mmu-miR-466b-3p	20.921	24.5026	26.3655	29.0616	13.954	25.2326	35.9876	34.8482	23.6606
mmu-miR-466b-3p	20.921	24.5026	26.3655	29.0616	13.954	25.2326	35.9876	34.8482	23.6606
mmu-miR-466b-3p	20.921	24.5026	26.3655	29.0616	13.954	25.2326	35.9876	34.8482	23.6606
mmu-miR-466b-3p	20.921	24.5026	26.3655	29.0616	13.954	25.2326	35.9876	34.8482	23.6606
mmu-miR-466b-3p	20.921	24.5026	26.3655	29.0616	13.954	25.2326	35.9876	34.8482	23.6606
mmu-miR-466b-3p	20.921	24.5026	26.3655	29.0616	13.954	25.2326	35.9876	34.8482	23.6606
mmu-miR-466b-3p	20.921	24.5026	26.3655	29.0616	13.954	25.2326	35.9876	34.8482	23.6606
mmu-miR-466b-3p	20.921	24.5026	26.3655	29.0616	13.954	25.2326	35.9876	34.8482	23.6606
mmu-miR-466b-3p	20.921	24.5026	26.3655	29.0616	13.954	25.2326	35.9876	34.8482	23.6606
mmu-miR-466b-5p	0.973072	1.28961	1.46475	2.30191	2.99015	1.29398	3.07211	1.8103	1.79701
mmu-miR-466b-5p	0.973072	1.28961	1.46475	2.01417	2.99015	0.970485	2.4138	1.8103	1.79701
mmu-miR-466b-5p	0.973072	1.28961	1.46475	2.30191	2.99015	1.29398	3.07211	1.8103	1.79701
mmu-miR-466b-5p	0.973072	1.28961	1.46475	2.30191	2.99015	1.29398	3.07211	1.8103	1.79701
mmu-miR-466b-5p	0.973072	1.28961	1.46475	2.30191	2.99015	1.29398	3.07211	1.8103	1.79701
mmu-miR-466b-5p	0.973072	1.28961	1.46475	2.30191	2.99015	1.29398	3.07211	1.8103	1.79701
mmu-miR-466b-5p	0.973072	1.28961	1.46475	2.30191	2.99015	1.29398	3.07211	1.8103	1.79701
mmu-miR-466b-5p	0.486536	1.28961	0.366188	0.575476	1.99344	0.323495	0.438873	0.905148	0.299501
mmu-miR-466b-5p	0.486536	1.28961	0.366188	0.575476	1.99344	0.323495	0.438873	0.905148	0.299501
mmu-miR-466b-5p	0.973072	1.28961	1.46475	2.30191	2.99015	1.29398	3.07211	1.8103	1.79701
mmu-miR-466c-3p	18.9749	22.8906	25.9993	27.0474	11.9606	24.2621	34.8904	31.2276	22.4626
mmu-miR-466c-3p	20.921	24.5026	26.3655	29.0616	13.954	25.2326	35.9876	34.8482	23.6606
mmu-miR-466c-3p	20.921	24.5026	26.3655	29.0616	13.954	25.2326	35.9876	34.8482	23.6606
mmu-miR-466c-3p	17.0288	21.2786	18.6756	26.1842	8.4721	19.7332	30.9406	26.7019	16.4726
mmu-miR-466c-3p	20.921	24.5026	26.3655	29.0616	13.954	25.2326	35.9876	34.8482	23.6606
mmu-miR-466c-3p	20.921	24.5026	26.3655	29.0616	13.954	25.2326	35.9876	34.8482	23.6606
mmu-miR-466c-3p	20.921	24.5026	26.3655	29.0616	13.954	25.2326	35.9876	34.8482	23.6606
mmu-miR-466c-3p	20.921	24.5026	26.3655	29.0616	13.954	25.2326	35.9876	34.8482	23.6606
mmu-miR-466c-3p	20.921	24.5026	26.3655	29.0616	13.954	25.2326	35.9876	34.8482	23.6606
mmu-miR-466c-3p	20.921	24.5026	26.3655	29.0616	13.954	25.2326	35.9876	34.8482	23.6606
mmu-miR-466c-3p	20.921	24.5026	26.3655	29.0616	13.954	25.2326	35.9876	34.8482	23.6606
mmu-miR-466c-3p	20.921	24.5026	26.3655	29.0616	13.954	25.2326	35.9876	34.8482	23.6606
mmu-miR-466c-3p	20.921	24.5026	26.3655	29.0616	13.954	25.2326	35.9876	34.8482	23.6606
mmu-miR-466c-3p	20.921	24.5026	26.3655	29.0616	13.954	25.2326	35.9876	34.8482	23.6606
mmu-miR-466c-5p	1.45961	2.25682	2.19713	2.30191	2.49179	2.58796	2.85268	2.26287	1.49751
mmu-miR-466c-5p	1.45961	2.25682	2.19713	2.30191	2.49179	2.58796	2.85268	2.26287	1.49751
mmu-miR-466c-5p	1.45961	2.25682	2.19713	2.30191	2.49179	2.58796	2.85268	2.26287	1.49751
mmu-miR-466d-3p	7.78457	10.9617	11.718	11.7973	8.97046	12.6163	15.3606	14.0298	9.88353
mmu-miR-466d-5p	2.43268	10.6393	4.76044	8.05667	6.97702	9.05786	9.87464	10.8618	10.4825
mmu-miR-466d-5p	2.43268	10.6393	4.76044	8.05667	6.97702	9.05786	9.87464	10.8618	10.4825
mmu-miR-466e-3p	18.9749	22.8906	25.9993	27.3351	11.9606	24.2621	34.8904	31.2276	22.4626
mmu-miR-466e-3p	20.921	24.5026	26.3655	29.3493	13.954	25.2326	35.9876	34.8482	23.6606
mmu-miR-466e-3p	20.921	24.5026	26.3655	29.3493	13.954	25.2326	35.9876	34.8482	23.6606
mmu-miR-466e-3p	20.921	24.5026	26.3655	29.3493	13.954	25.2326	35.9876	34.8482	23.6606
mmu-miR-466e-3p	20.921	24.5026	26.3655	29.3493	13.954	25.2326	35.9876	34.8482	23.6606
mmu-miR-466e-3p	20.921	24.5026	26.3655	29.3493	13.954	25.2326	35.9876	34.8482	23.6606
mmu-miR-466e-3p	20.921	24.5026	26.3655	29.3493	13.954	25.2326	35.9876	34.8482	23.6606
mmu-miR-466e-3p	20.921	24.5026	26.3655	29.3493	13.954	25.2326	35.9876	34.8482	23.6606
mmu-miR-466e-3p	20.921	24.5026	26.3655	29.3493	13.954	25.2326	35.9876	34.8482	23.6606
mmu-miR-466e-3p	20.921	24.5026	26.3655	29.3493	13.954	25.2326	35.9876	34.8482	23.6606
mmu-miR-466e-3p	20.921	24.5026	26.3655	29.3493	13.954	25.2326	35.9876	34.8482	23.6606
mmu-miR-466e-3p	20.921	24.5026	26.3655	29.3493	13.954	25.2326	35.9876	34.8482	23.6606
mmu-miR-466e-3p	20.921	24.5026	26.3655	29.0616	13.954	25.2326	35.9876	34.8482	23.6606
mmu-miR-466e-5p	0.486536	1.28961	0.366188	0.575476	1.99344	0.323495	0.438873	0.905148	0.299501
mmu-miR-466e-5p	0.486536	1.28961	0.366188	0.575476	1.99344	0.323495	0.438873	0.905148	0.299501
mmu-miR-466f	0	0.322403	0	0.287738	0.498359	0	0	0	0
mmu-miR-466f	0	0.322403	0	0.287738	0.498359	0	0	0	0
mmu-miR-466f	0	0.322403	0	0.287738	0.498359	0	0	0	0
mmu-miR-466f	0	0.322403	0	0.287738	0.498359	0	0	0	0
mmu-miR-466f-3p	0.486536	0	0	0.575476	0.498359	0.64699	0	0	0
mmu-miR-466f-3p	0.486536	3.22403	2.9295	4.60381	1.49508	2.58796	2.4138	3.62059	2.99501
mmu-miR-466f-3p	0.973072	0.967208	2.19713	2.58964	0.996718	2.26446	1.97493	3.62059	2.69551
mmu-miR-466f-5p	0	0.322403	0	0.287738	0.498359	0	0	0	0
mmu-miR-466f-5p	0	0.322403	0	0.287738	0.498359	0	0	0	0
mmu-miR-466f-5p	0	0.322403	0	0.287738	0.498359	0	0	0	0
mmu-miR-466f-5p	0	0.322403	0	0.287738	0.498359	0	0	0	0
mmu-miR-466g	3.40575	8.70487	8.7885	9.20762	4.48523	6.79339	9.43577	5.88346	11.6805
mmu-miR-466h-3p	0.486536	1.28961	1.46475	1.43869	0.996718	1.29398	2.85268	1.35772	1.198
mmu-miR-466h-3p	0.973072	1.28961	1.46475	1.43869	0.996718	1.29398	3.07211	1.35772	1.198
mmu-miR-466h-5p	0	0.967208	1.09856	0.575476	1.99344	1.29398	1.97493	3.16802	1.49751
mmu-miR-466i-3p	0	0	1.09856	1.15095	0.498359	0	0.219437	0.452574	0.599002
mmu-miR-466i-5p	5.10863	5.80325	2.9295	2.58964	4.48523	2.42621	1.97493	3.84688	4.79202
mmu-miR-466i-5p	7.78457	8.54367	4.94353	4.02833	6.22949	2.91145	2.85268	5.88346	6.43927
mmu-miR-466i-5p	5.10863	5.96445	2.9295	2.58964	4.48523	2.42621	1.53606	4.29945	4.49252
mmu-miR-466j	0	0	0	0	0	0	0	0	0
mmu-miR-466k	0	0.322403	0	0.287738	0.996718	0.970485	1.09718	0.905148	0
mmu-miR-466l-3p	0	0	0	0	0	0	0	0	0
mmu-miR-466l-5p	0	0	0	0	0	0	0	0	0
mmu-miR-466m-3p	0.486536	0.967208	0	0.287738	0.498359	0.64699	0	0	0
mmu-miR-466m-5p	0	0.322403	0.366188	0.287738	0	0	0	0	0
mmu-miR-466m-5p	0	0.322403	0.366188	0.287738	0	0	0	0	0
mmu-miR-466m-5p	0	0.322403	0.366188	0.287738	0	0	0	0	0
mmu-miR-466m-5p	0	0.322403	0.366188	0.287738	0	0	0	0	0
mmu-miR-466m-5p	0	0.322403	0.366188	0.287738	0	0	0	0	0
mmu-miR-466m-5p	0	0.322403	0.366188	0.287738	0	0	0	0	0
mmu-miR-466m-5p	0	0.322403	0.366188	0.287738	0	0	0	0	0
mmu-miR-466m-5p	0	0.322403	0.366188	0.287738	0	0	0	0	0
mmu-miR-466m-5p	0	0.322403	0.366188	0.287738	0	0	0	0	0
mmu-miR-466m-5p	0	0.322403	0.366188	0.287738	0	0	0	0	0
mmu-miR-466n-3p	0	0.967208	0.366188	0.575476	0	0	0.219437	0	0
mmu-miR-466n-5p	2.43268	10.6393	4.76044	8.05667	6.97702	9.05786	9.87464	10.8618	10.4825
mmu-miR-466n-5p	2.43268	10.6393	4.76044	8.05667	6.97702	9.05786	9.87464	10.8618	10.4825
mmu-miR-466o-3p	0	0	0	0.863215	0	0	0.219437	0.452574	0.299501
mmu-miR-466o-5p	0.973072	1.28961	1.46475	2.30191	2.99015	1.29398	3.07211	1.8103	1.79701
mmu-miR-466o-5p	0.973072	1.28961	1.46475	2.01417	2.99015	0.970485	2.4138	1.8103	1.79701
mmu-miR-466o-5p	0.973072	1.28961	1.46475	2.30191	2.99015	1.29398	3.07211	1.8103	1.79701
mmu-miR-466o-5p	0.973072	1.28961	1.46475	2.30191	2.99015	1.29398	3.07211	1.8103	1.79701
mmu-miR-466o-5p	0.973072	1.28961	1.46475	2.30191	2.99015	1.29398	3.07211	1.8103	1.79701
mmu-miR-466o-5p	0.973072	1.28961	1.46475	2.30191	2.99015	1.29398	3.07211	1.8103	1.79701
mmu-miR-466o-5p	0.973072	1.28961	1.46475	2.30191	2.99015	1.29398	3.07211	1.8103	1.79701
mmu-miR-466o-5p	0.486536	1.28961	0.366188	0.575476	1.99344	0.323495	0.438873	0.905148	0.299501
mmu-miR-466o-5p	0.486536	1.28961	0.366188	0.575476	1.99344	0.323495	0.438873	0.905148	0.299501
mmu-miR-466o-5p	0.973072	1.28961	1.46475	2.30191	2.99015	1.29398	3.07211	1.8103	1.79701
mmu-miR-466p-3p	18.9749	22.8906	25.9993	27.0474	11.9606	24.2621	34.8904	31.2276	22.4626
mmu-miR-466p-3p	20.921	24.5026	26.3655	29.0616	13.954	25.2326	35.9876	34.8482	23.6606
mmu-miR-466p-3p	20.921	24.5026	26.3655	29.0616	13.954	25.2326	35.9876	34.8482	23.6606
mmu-miR-466p-3p	17.0288	21.2786	18.6756	26.1842	8.4721	19.7332	30.9406	26.7019	16.4726
mmu-miR-466p-3p	20.921	24.5026	26.3655	29.0616	13.954	25.2326	35.9876	34.8482	23.6606
mmu-miR-466p-3p	20.921	24.5026	26.3655	29.0616	13.954	25.2326	35.9876	34.8482	23.6606
mmu-miR-466p-3p	20.921	24.5026	26.3655	29.0616	13.954	25.2326	35.9876	34.8482	23.6606
mmu-miR-466p-3p	20.921	24.5026	26.3655	29.0616	13.954	25.2326	35.9876	34.8482	23.6606
mmu-miR-466p-3p	20.921	24.5026	26.3655	29.0616	13.954	25.2326	35.9876	34.8482	23.6606
mmu-miR-466p-3p	20.921	24.5026	26.3655	29.0616	13.954	25.2326	35.9876	34.8482	23.6606
mmu-miR-466p-3p	20.921	24.5026	26.3655	29.0616	13.954	25.2326	35.9876	34.8482	23.6606
mmu-miR-466p-3p	20.921	24.5026	26.3655	29.0616	13.954	25.2326	35.9876	34.8482	23.6606
mmu-miR-466p-3p	20.921	24.5026	26.3655	29.0616	13.954	25.2326	35.9876	34.8482	23.6606
mmu-miR-466p-3p	20.921	24.5026	26.3655	29.0616	13.954	25.2326	35.9876	34.8482	23.6606
mmu-miR-466p-5p	1.45961	0.322403	0.366188	0.575476	1.99344	0	0.877746	1.35772	0
mmu-miR-466p-5p	0.486536	0.322403	0.732375	1.72643	1.99344	0.323495	3.07211	1.8103	0.599002
mmu-miR-466q	0	2.90162	2.56331	1.72643	1.99344	1.61747	1.75549	1.35772	1.49751
mmu-miR-467a-3p	4.86536	12.8961	21.2389	12.3727	13.954	14.2338	12.069	17.6504	11.98
mmu-miR-467a-3p	4.86536	12.8961	21.2389	12.3727	13.954	14.2338	12.069	17.6504	11.98
mmu-miR-467a-3p	4.86536	12.8961	21.2389	12.3727	13.954	14.2338	12.069	17.6504	11.98
mmu-miR-467a-3p	4.86536	12.8961	21.2389	12.3727	13.954	14.2338	12.069	17.6504	11.98
mmu-miR-467a-3p	4.86536	12.8961	21.2389	12.3727	13.954	14.2338	12.069	17.6504	11.98
mmu-miR-467a-3p	4.86536	12.8961	21.2389	12.3727	13.954	14.2338	12.069	17.6504	11.98
mmu-miR-467a-3p	4.86536	12.8961	21.2389	12.3727	13.954	14.2338	12.069	17.6504	11.98
mmu-miR-467a-3p	4.86536	12.8961	21.2389	12.3727	13.954	14.2338	12.069	17.6504	11.98
mmu-miR-467a-3p	4.86536	12.8961	21.2389	12.3727	13.954	14.2338	12.069	17.6504	11.98
mmu-miR-467a-3p	4.86536	12.8961	21.2389	12.3727	13.954	14.2338	12.069	17.6504	11.98
mmu-miR-467a-3p	4.86536	12.8961	21.2389	12.3727	13.954	14.2338	12.069	17.6504	11.98
mmu-miR-467a-5p	54.0055	77.6991	85.3217	111.93	77.744	87.9906	95.8938	92.3251	75.4743
mmu-miR-467a-5p	54.0055	77.6991	85.3217	111.93	77.744	87.9906	95.8938	92.3251	75.4743
mmu-miR-467a-5p	54.0055	77.6991	85.3217	111.93	77.744	87.9906	95.8938	92.3251	75.4743
mmu-miR-467a-5p	54.0055	77.6991	85.3217	111.93	77.744	87.9906	95.8938	92.3251	75.4743
mmu-miR-467a-5p	54.0055	77.6991	85.3217	111.93	77.744	87.9906	95.8938	92.3251	75.4743
mmu-miR-467a-5p	54.0055	77.6991	85.3217	111.93	77.744	87.9906	95.8938	92.3251	75.4743
mmu-miR-467a-5p	54.0055	77.6991	85.3217	111.93	77.744	87.9906	95.8938	92.3251	75.4743
mmu-miR-467a-5p	54.0055	77.6991	85.3217	111.93	77.744	87.9906	95.8938	92.3251	75.4743
mmu-miR-467a-5p	54.0055	77.6991	85.3217	111.93	77.744	87.9906	95.8938	92.3251	75.4743
mmu-miR-467a-5p	54.0055	77.6991	85.3217	111.93	77.744	87.9906	95.8938	92.3251	75.4743
mmu-miR-467a-5p	54.0055	77.6991	85.3217	111.93	77.744	87.9906	95.8938	92.3251	75.4743
mmu-miR-467b-3p	0	0.644805	0	0.575476	0	0.323495	0.438873	0	0.299501
mmu-miR-467b-5p	54.0055	77.6991	85.3217	111.93	77.744	87.9906	95.8938	92.3251	75.4743
mmu-miR-467b-5p	54.0055	77.6991	85.3217	111.93	77.744	87.9906	95.8938	92.3251	75.4743
mmu-miR-467b-5p	54.0055	77.6991	85.3217	111.93	77.744	87.9906	95.8938	92.3251	75.4743
mmu-miR-467b-5p	54.0055	77.6991	85.3217	111.93	77.744	87.9906	95.8938	92.3251	75.4743
mmu-miR-467b-5p	54.0055	77.6991	85.3217	111.93	77.744	87.9906	95.8938	92.3251	75.4743
mmu-miR-467b-5p	54.0055	77.6991	85.3217	111.93	77.744	87.9906	95.8938	92.3251	75.4743
mmu-miR-467b-5p	54.0055	77.6991	85.3217	111.93	77.744	87.9906	95.8938	92.3251	75.4743
mmu-miR-467b-5p	54.0055	77.6991	85.3217	111.93	77.744	87.9906	95.8938	92.3251	75.4743
mmu-miR-467b-5p	54.0055	77.6991	85.3217	111.93	77.744	87.9906	95.8938	92.3251	75.4743
mmu-miR-467b-5p	54.0055	77.6991	85.3217	111.93	77.744	87.9906	95.8938	92.3251	75.4743
mmu-miR-467b-5p	54.0055	77.6991	85.3217	111.93	77.744	87.9906	95.8938	92.3251	75.4743
mmu-miR-467c-3p	0	0.322403	1.46475	0	0	0	0.219437	0.452574	0
mmu-miR-467c-5p	11.6769	13.8633	17.577	28.1983	24.4196	25.8796	23.9186	24.439	17.6706
mmu-miR-467d-3p	4.86536	12.8961	21.2389	12.3727	13.954	14.2338	12.069	17.6504	11.98
mmu-miR-467d-3p	4.86536	12.8961	21.2389	12.3727	13.954	14.2338	12.069	17.6504	11.98
mmu-miR-467d-3p	4.86536	12.8961	21.2389	12.3727	13.954	14.2338	12.069	17.6504	11.98
mmu-miR-467d-3p	4.86536	12.8961	21.2389	12.3727	13.954	14.2338	12.069	17.6504	11.98
mmu-miR-467d-3p	4.86536	12.8961	21.2389	12.3727	13.954	14.2338	12.069	17.6504	11.98
mmu-miR-467d-3p	4.86536	12.8961	21.2389	12.3727	13.954	14.2338	12.069	17.6504	11.98
mmu-miR-467d-3p	4.86536	12.8961	21.2389	12.3727	13.954	14.2338	12.069	17.6504	11.98
mmu-miR-467d-3p	4.86536	12.8961	21.2389	12.3727	13.954	14.2338	12.069	17.6504	11.98
mmu-miR-467d-3p	4.86536	12.8961	21.2389	12.3727	13.954	14.2338	12.069	17.6504	11.98
mmu-miR-467d-3p	4.86536	12.8961	21.2389	12.3727	13.954	14.2338	12.069	17.6504	11.98
mmu-miR-467d-3p	4.86536	12.8961	21.2389	12.3727	13.954	14.2338	12.069	17.6504	11.98
mmu-miR-467d-5p	52.5459	70.2838	65.5476	77.1138	80.2358	92.196	84.0442	81.4633	73.6773
mmu-miR-467e-3p	0	0	2.9295	0.575476	0	0	0.219437	0.905148	0
mmu-miR-467e-5p	20.4345	28.6938	25.2669	32.8022	37.8753	44.9658	35.3293	31.6802	23.0616
mmu-miR-467f	0	0.322403	0	0	0	0	0.219437	0	0
mmu-miR-467g	0	0.322403	0	0	0.498359	0.323495	0	0.452574	0
mmu-miR-467h	0.486536	0	0.732375	1.43869	0	0	0.438873	1.35772	0.299501
mmu-miR-468-3p	0	0	0	0	0	0	0	0	0
mmu-miR-468-5p	0	0	0	0	0	0	0	0	0
mmu-miR-470-3p	0	0	0	0	0	0	0	0	0
mmu-miR-470-5p	0.486536	0.967208	0	0	0	0.64699	0.65831	0	0.898503
mmu-miR-471-3p	0	0	0	0	0	0	0	0	0
mmu-miR-471-5p	0	0	0	0	0	0	0	0	0
mmu-miR-483-3p	6.32497	0.967208	1.83094	2.30191	0.498359	1.61747	1.97493	0	0.299501
mmu-miR-483-5p	2.91921	2.57922	2.9295	1.72643	1.99344	0.323495	0.877746	0.452574	1.49751
mmu-miR-484	874.305	963.017	1110.28	1038.16	864.154	797.738	1322.32	935.47	894.909
mmu-miR-485-3p	970.152	913.044	777.416	1041.32	727.604	585.849	1647.75	904.695	635.541
mmu-miR-485-5p	1102.98	1329.27	1410.55	1359.56	1142.74	1236.07	1439.94	1141.39	1436.11
mmu-miR-486a-3p	38.9229	36.7539	30.3936	68.1939	46.8457	48.5242	27.2101	37.5636	26.0566
mmu-miR-486a-5p	17670.5	12581.4	15540.3	19642.2	15148.1	25942	19903.6	12472	13984.6
mmu-miR-486a-5p	17622.8	12552.4	15502.6	19595.5	15117.7	25893.2	19851.3	12442.2	13946
mmu-miR-486b-3p	38.9229	36.7539	30.3936	68.1939	46.8457	48.5242	27.2101	37.5636	26.0566
mmu-miR-486b-3p	2.43268	9.02728	6.59138	9.7831	9.96718	7.44038	3.73042	6.78861	5.69052
mmu-miR-486b-5p	17670.5	12581.4	15540.3	19642.2	15148.1	25942	19903.6	12472	13984.6
mmu-miR-486b-5p	17622.8	12552.4	15502.6	19595.5	15117.7	25893.2	19851.3	12442.2	13946
mmu-miR-487b-3p	3223.79	3966.2	3451.68	3952.37	3433.19	3091.32	4633.18	3636.88	3540.7
mmu-miR-487b-5p	1.94614	2.57922	3.29569	5.46703	2.49179	5.82291	4.8276	0.905148	2.39601
mmu-miR-488-3p	2840.4	3375.56	3536.27	2869.61	3363.42	3012.71	2304.74	3302.89	3227.72
mmu-miR-488-5p	379.011	370.118	447.847	300.686	398.189	377.842	351.098	367.943	372.28
mmu-miR-489-3p	1.45961	0.322403	1.46475	2.87738	4.48523	1.61747	3.29155	1.8103	0
mmu-miR-489-5p	0	0	0	0	0	0	0	0	0
mmu-miR-490-3p	171.261	258.567	459.199	337.229	287.553	317.995	227.995	319.517	283.028
mmu-miR-490-5p	30.6518	17.0873	35.5202	39.1324	22.4262	42.7013	22.3825	28.0596	19.1681
mmu-miR-491-3p	0.486536	3.54643	3.29569	0.863215	1.49508	3.23495	3.29155	2.26287	2.09651
mmu-miR-491-5p	11.1903	9.34968	16.4784	9.20762	3.98687	11.6458	5.70535	9.95663	7.18802
mmu-miR-493-3p	4.37882	9.67208	6.95757	7.76893	7.47538	11.3223	12.069	10.8618	7.78703
mmu-miR-493-5p	64.7093	55.4533	49.0691	51.7929	56.8129	53.3767	57.7118	79.2005	62.8952
mmu-miR-494-3p	0.486536	4.83604	9.15469	0.863215	5.48195	3.88194	2.4138	4.97831	2.69551
mmu-miR-494-5p	0.486536	0.322403	0	0	0.498359	0.323495	0	0.452574	0.299501
mmu-miR-495-3p	144.501	176.354	209.826	197.388	157.98	144.926	211.317	163.379	162.929
mmu-miR-495-5p	0.486536	1.93442	0.366188	0.863215	2.99015	1.61747	2.4138	2.26287	2.99501
mmu-miR-496a-3p	252.026	211.174	210.924	236.233	226.753	194.42	269.029	242.127	239.002
mmu-miR-496a-5p	0.973072	0	2.19713	1.15095	4.98359	0	0.219437	0.452574	0.299501
mmu-miR-496b	0	0	0	0	0	0	0	0	0
mmu-miR-497a-3p	2.43268	0.967208	1.09856	1.15095	0.996718	0.970485	1.53606	0	1.49751
mmu-miR-497a-5p	218.941	262.758	338.357	182.138	269.114	177.275	180.157	287.384	217.438
mmu-miR-497b	0	0	0	0	0	0	0.219437	0	0
mmu-miR-499-3p	0	0	0	0	0	0.970485	0	0	0
mmu-miR-499-5p	5.83843	5.15844	4.02806	5.17929	4.98359	3.55844	2.4138	4.07317	4.49252
mmu-miR-500-3p	45.7344	37.0763	62.2519	57.5476	44.3539	50.1417	56.6146	52.9512	41.9301
mmu-miR-500-5p	0	0.644805	1.46475	1.15095	0	0.64699	1.97493	2.26287	1.198
mmu-miR-501-3p	105.578	77.6991	108.025	122.289	86.7144	106.43	150.753	68.3387	99.7338
mmu-miR-501-5p	4.86536	3.86883	3.29569	4.02833	3.48851	3.88194	4.38873	3.62059	2.69551
mmu-miR-503-3p	6.32497	4.51364	4.02806	8.34441	3.48851	6.1464	4.8276	3.16802	2.99501
mmu-miR-503-5p	0.973072	0	0.732375	0.575476	0.996718	1.61747	0.219437	0	0
mmu-miR-504-3p	0.973072	2.25682	0.732375	1.43869	0.498359	0.323495	0	0	1.79701
mmu-miR-504-5p	37.9498	52.874	48.3368	35.9673	29.9015	21.6742	56.1758	57.0243	35.0416
mmu-miR-5046	0	0	0	0	0	0	0	0	0
mmu-miR-505-3p	3.40575	7.41526	7.32375	4.89155	3.98687	5.82291	5.92479	11.3144	8.38603
mmu-miR-505-5p	5.35189	6.77046	9.88707	8.05667	10.4655	8.41087	9.65521	7.24118	9.28453
mmu-miR-509-3p	0	0.644805	0	0	0	0	0	0	0
mmu-miR-509-5p	0	0	0	0	0	0	0	0	0
mmu-miR-5098	0	0	0	0	0	0	0	0	0
mmu-miR-5099	397.986	268.884	208.361	200.266	285.061	288.557	279.782	289.647	305.491
mmu-miR-5100	96.8206	101.879	21.6051	60.7128	177.914	6.79339	5.04704	209.089	33.5441
mmu-miR-5101	0	0	0	0	0	0	0	0.452574	0
mmu-miR-5103	0.486536	0	1.09856	0	0	0.64699	0	0	0
mmu-miR-5104	0	0.322403	0	0	0	0	0	0	0
mmu-miR-5106	0	0	0	0	0.498359	1.61747	0	0	0.299501
mmu-miR-5107-3p	1.45961	0	0	0	0	0	0	0	0
mmu-miR-5107-5p	0	0	0	0	0	0	0	0	0.299501
mmu-miR-5108	0	0	0	0	0	0	0.438873	0	0.299501
mmu-miR-5110	0	0	0	0	0	0	0	0	0
mmu-miR-5112	0.486536	0	0	0	0	0	0	0	0
mmu-miR-5113	0.486536	1.61201	3.29569	1.43869	2.49179	0	0.219437	0.905148	4.19301
mmu-miR-511-3p	0.973072	0.322403	0.732375	0	0	0.970485	0.438873	0.905148	1.198
mmu-miR-5114	0.973072	0.644805	0	1.15095	0.498359	0	0.65831	1.35772	0
mmu-miR-511-5p	0	1.28961	0.366188	0	2.49179	0.323495	0.877746	0	0
mmu-miR-5116	0	0	0	0	0	0	0	0	0
mmu-miR-5118	0	0	0	0	0	0	0	0	0
mmu-miR-5119	15.0826	2.90162	1.83094	20.1417	32.3933	19.0862	1.75549	7.69376	2.69551
mmu-miR-5120	0	0	0	0	0	0	0	0	0
mmu-miR-5121	6.8115	4.19124	1.83094	3.7406	4.98359	2.58796	3.07211	9.50405	7.48753
mmu-miR-5122	6.32497	0	4.02806	1.43869	2.49179	1.61747	3.51098	0.452574	0.898503
mmu-miR-5123	0	0.322403	0	0	0	0.64699	0	0.452574	0
mmu-miR-5124a	1.45961	0	1.46475	0.287738	0.498359	0.323495	1.75549	1.35772	0.898503
mmu-miR-5124b	0	0	0	0	0	0	0	0	0
mmu-miR-5125	0.486536	0	0	0.287738	0.498359	0	0	0	0
mmu-miR-5126	78.3323	35.7867	27.4641	41.722	71.2653	22.9681	18.6521	92.3251	20.9651
mmu-miR-5127	0	0.322403	0	0	0	0	0	0	0
mmu-miR-5128	6.8115	4.19124	3.66188	3.45286	3.98687	4.20543	3.73042	2.71544	4.19301
mmu-miR-5129-3p	12.6499	21.9234	17.577	10.6463	8.4721	10.6753	6.5831	14.9349	10.183
mmu-miR-5129-5p	0.973072	1.28961	2.56331	0.863215	1.49508	1.94097	0.65831	1.8103	0.898503
mmu-miR-5130	0	0	0	0.287738	0	0	0	0.452574	0
mmu-miR-5131	0	0	0	0	0	0	0	0	0.299501
mmu-miR-5132-3p	0	0.644805	1.83094	0	0	0.64699	0.438873	0	0.299501
mmu-miR-5132-5p	0	0.644805	0.366188	0.863215	0	0	0.438873	0.452574	0
mmu-miR-5133	0	0	0	0	0	0	0	0	0
mmu-miR-5134-3p	0	0	0.366188	0.575476	0	0	0.438873	0.905148	0.599002
mmu-miR-5134-5p	0	0	0	0.287738	0.498359	0	0	0	0.599002
mmu-miR-5135	0	0	0	0	0	0	0	0	0
mmu-miR-5136	0	0	0	0	0	0	0	0	0
mmu-miR-532-3p	52.0593	69.9614	91.1807	60.425	56.8129	69.8749	64.2949	55.214	58.4027
mmu-miR-532-5p	795.973	911.432	1205.12	1133.4	990.737	992.806	1407.25	1045.9	957.205
mmu-miR-539-3p	12.6499	17.4097	17.9432	16.6888	14.4524	12.2928	11.4107	16.2927	10.183
mmu-miR-539-5p	76.8727	55.1309	37.7173	61.0005	46.3474	49.1712	73.2918	52.9512	37.1381
mmu-miR-540-3p	926.364	937.225	902.653	1063.19	955.852	1138.06	1088.41	996.568	1142.6
mmu-miR-540-5p	152.772	176.354	223.374	225.011	175.422	144.926	120.251	145.276	118.602
mmu-miR-541-3p	1.94614	2.57922	3.29569	2.87738	1.49508	1.61747	2.19437	3.16802	1.79701
mmu-miR-541-5p	43292	30861.7	32275.8	39095.3	35953.6	45146	39765	31675.2	36967.4
mmu-miR-542-3p	24.3268	26.437	30.0274	23.5945	30.8983	32.673	25.2352	31.2276	30.5491
mmu-miR-542-5p	3.40575	9.02728	9.15469	9.7831	9.96718	9.05786	10.7524	6.33604	8.38603
mmu-miR-543-3p	296.787	289.195	288.19	277.38	219.776	230.328	367.776	247.558	242.296
mmu-miR-543-5p	30.1652	25.1474	13.9151	31.3635	20.4327	30.085	41.4735	32.1328	32.9451
mmu-miR-544-3p	17.5153	24.825	30.3936	24.4577	29.9015	16.4982	26.3324	18.103	22.1631
mmu-miR-544-5p	38.4363	39.3331	39.9145	51.2174	29.4032	21.6742	57.2729	37.5636	30.2496
mmu-miR-546	0	0	0	0	0	0	0	0	0.299501
mmu-miR-547-3p	2.91921	1.61201	2.56331	4.31607	2.49179	4.20543	0.877746	2.26287	2.39601
mmu-miR-547-5p	0	0.322403	0	0	0	0	0	0	0
mmu-miR-551b-3p	62.2766	91.24	102.533	62.1514	92.1964	51.7592	42.3513	76.485	62.8952
mmu-miR-551b-5p	3.89229	5.80325	5.49281	5.17929	7.97374	4.85242	3.94986	7.24118	5.69052
mmu-miR-5615-3p	0	0.322403	0	0	0.996718	0.64699	0.219437	0	0
mmu-miR-5615-3p	0	0.322403	0	0	0.996718	0.64699	0.219437	0	0
mmu-miR-5615-5p	4.86536	2.90162	4.39425	4.31607	3.48851	5.49941	5.26648	4.52574	3.29451
mmu-miR-5615-5p	4.86536	2.90162	4.39425	4.31607	3.48851	5.49941	5.26648	4.52574	3.29451
mmu-miR-5616-3p	1.45961	0	0	0	0	0.323495	0	0	0
mmu-miR-5616-5p	0	0	0	0	0	0	0	0	0.299501
mmu-miR-5617-3p	3.40575	3.22403	4.39425	2.01417	0	1.94097	2.85268	1.8103	2.69551
mmu-miR-5617-5p	0	0.322403	0.366188	0	0	0	2.19437	1.35772	1.198
mmu-miR-5618-3p	0	0	0	0	0	0	0	0	0
mmu-miR-5618-5p	0	0	0	0	0	0	0	0	0
mmu-miR-5619-3p	0.973072	0.322403	0	0	0	0	0	0	0
mmu-miR-5619-5p	0	0	0	0	0	0	0	0	0
mmu-miR-5620-3p	0.973072	0	0	0	0	0	0	0	0
mmu-miR-5620-5p	0	0.644805	1.83094	0.287738	0	0	0	0.452574	0.299501
mmu-miR-5621-3p	0.973072	1.28961	0.732375	2.30191	0.996718	1.61747	0.877746	1.35772	0.599002
mmu-miR-5621-5p	0.973072	0	0	0	0	0	0	0	0
mmu-miR-5622-3p	0	0	0	0	0	0	0	0	0
mmu-miR-5622-5p	0	0	0	0	0	0	0	0	0
mmu-miR-5623-3p	0	0	0	0	0	0	0	0	0
mmu-miR-5623-5p	0	0	0.366188	0	0	0.323495	0	0.452574	0.599002
mmu-miR-5624-3p	0	0	0.732375	0.287738	0.498359	0.323495	0	0	0
mmu-miR-5624-5p	0.486536	0.322403	0	0	0.498359	0	0.438873	0	0.299501
mmu-miR-5625-3p	0	0	0	0	0	0	0	0	0
mmu-miR-5625-5p	0	0	0	0	0	0	0	0	0
mmu-miR-5626-3p	1.45961	1.28961	2.56331	2.30191	0	0.64699	0.65831	0	0.898503
mmu-miR-5626-5p	0	0.322403	0	0	0	0.323495	0	0	0.599002
mmu-miR-5627-3p	0	0	0	1.43869	0.498359	1.94097	1.09718	0	0.599002
mmu-miR-5627-5p	0	0	0	0.287738	0	0	0.65831	0	0
mmu-miR-568	0	0	0	0	0	0	0	0	0
mmu-miR-5709-3p	0	0	0	0.287738	0.498359	0	0	0	0
mmu-miR-5709-5p	1.94614	2.57922	0	0.575476	0.996718	1.29398	3.73042	1.8103	0.299501
mmu-miR-5710	0	0.967208	0	0.287738	0	0	0.219437	0	0
mmu-miR-574-3p	50.5997	49.65	58.2238	47.1891	36.8786	32.3495	36.8653	56.5718	47.6207
mmu-miR-574-5p	15.0826	24.1802	17.9432	16.4011	17.9409	18.4392	23.0408	19.9133	24.2596
mmu-miR-582-3p	1014.91	1389.88	1833.14	1712.62	1573.32	1709.02	1725.87	1656.42	1612.51
mmu-miR-582-5p	71.0342	111.551	128.166	124.303	122.596	108.371	128.37	97.3034	104.825
mmu-miR-590-3p	0	0	0	0	0	0	0	0	0
mmu-miR-590-5p	0	0	0	0	0	0	0	0	0
mmu-miR-592-3p	0	0	0	0.287738	0	0	0.219437	0	0
mmu-miR-592-5p	447.613	646.417	655.842	904.937	932.43	814.56	725.677	867.584	792.18
mmu-miR-598-3p	388.742	541.959	587.365	1048.23	676.771	717.512	1117.81	620.026	721.797
mmu-miR-598-5p	0.486536	2.25682	4.02806	2.58964	4.48523	2.26446	4.8276	2.71544	3.89351
mmu-miR-599	0	0	0	0	0	0	0	0	0
mmu-miR-615-3p	0	0	0	0	0	0.64699	0	0	0.299501
mmu-miR-615-5p	0	0	0	0	0	0	0	0	0
mmu-miR-6236	11.6769	9.02728	7.68994	13.8114	33.39	7.44038	0.65831	10.8618	5.99002
mmu-miR-6237	0	0	0	0	0	0	0	0	0
mmu-miR-6238	5.35189	0.644805	2.19713	1.43869	2.99015	2.58796	0.65831	4.97831	1.79701
mmu-miR-6239	0	0.644805	0	1.15095	0	0	0	0	0.599002
mmu-miR-6240	964.8	621.27	631.308	1748.87	3422.23	398.869	68.0253	1420.63	573.544
mmu-miR-6241	0	0	0	0	0	0	0	0	0
mmu-miR-6244	0	0	0	0	0	0	0	0	0
mmu-miR-6335	0	0	0	0	0	0	0	0	0
mmu-miR-6336	0.486536	0	0	0	0	0	0	0	0
mmu-miR-6337	0	0	0	0	0	0	0	0	0
mmu-miR-6338	0	0	0	0	0	0	0	0	0
mmu-miR-6339	0	0	0	0	0	0	0	0	0
mmu-miR-6340	0	0	0	0	0	0	0	0	0
mmu-miR-6341	0	0	0	0	0	0	0	0	0
mmu-miR-6342	0	0	0	0	0	0	0	0	0
mmu-miR-6343	0	0	0	0	0	0	0	0	0
mmu-miR-6344	0	0	0	0	0	0	0	0	0
mmu-miR-6345	0	0	0	0	0	0	0	0	0
mmu-miR-6346	0	0	0	0	0	0	0	0	0
mmu-miR-6347	0	0	0	0	0	0	0	0	0
mmu-miR-6348	0	0	0	0	0	0	0	0	0
mmu-miR-6349	0	0	0	0	0	0	0	0	0
mmu-miR-6350	0	0	0	0	0	0	0	0	0
mmu-miR-6351	0	0	0	0	0	0	0	0	0
mmu-miR-6352	0	0	0	0	0	0	0	0	0
mmu-miR-6353	0	0	0	0	0	0	0	0	0
mmu-miR-6354	0	0	0	0	0	0	0	0	0
mmu-miR-6355	0	0	0	0	0	0	0	0	0
mmu-miR-6356	0	0	0	0	0	0	0	0	0
mmu-miR-6357	0	0	0	0	0	0	0	0	0
mmu-miR-6358	0	0	0	0	0	0	0	0	0
mmu-miR-6359	0	0	0	0	0	0	0	0	0
mmu-miR-6360	0	0	0	0	0	0	0	0	0
mmu-miR-6361	0	0	0	0	0	0	0	0	0
mmu-miR-6362	0	0	0	0	0	0	0	0	0
mmu-miR-6363	0	0	0	0	0	0	0	0	0
mmu-miR-6364	0	0.644805	0	0	0	0	0	0	0
mmu-miR-6365	0	0	0	0	0	0	0	0	0
mmu-miR-6366	0	0	0	0	0	0	0	0	0
mmu-miR-6367	0	0	0	0	0	0	0	0	0
mmu-miR-6368	0	0	0	0	0	0	0	0	0
mmu-miR-6369	0	0	0	0	0	0	0	0	0
mmu-miR-6370	0	0	0	0	0	0	0	0	0
mmu-miR-6371	0	0	0	0	0	0	0	0	0
mmu-miR-6372	0	0	0	0	0	0	0	0	0
mmu-miR-6373	0	0	0	0	0	0	0	0	0
mmu-miR-6374	0	0	0	0	0	0	0	0	0
mmu-miR-6375	0	0	0	0	0	0	0	0	0
mmu-miR-6376	0	0	0	0	0	0	0	0	0
mmu-miR-6377	0	0	0	0	0	0	0	0	0
mmu-miR-6378	0	0	0	0	0	0	0	0	0
mmu-miR-6379	0	0	0	0	0	0	0	0	0
mmu-miR-6380	0.486536	0	0	0	0	0	0	0	0.299501
mmu-miR-6381	0	0	0	0	0	0	0	0	0
mmu-miR-6382	0	0	0	0	0	0	0	0	0
mmu-miR-6383	0	0	0	0	0	0	0	0	0
mmu-miR-6384	0	0	0	0	0	0	0	0	0
mmu-miR-6385	0	0	0	0	0	0	0	0	0
mmu-miR-6386	0	0	0	0	0	0	0	0	0
mmu-miR-6387	0	0	0	0	0	0	0	0	0
mmu-miR-6388	0	0	0	0	0	0	0	0	0
mmu-miR-6389	0	0	0	0	0	0	0	0	0
mmu-miR-6390	0	0	0	0	0	0	0	0	0
mmu-miR-6391	0	0	0	0	0	0	0	0	0
mmu-miR-6392-3p	0	0	0	0	0	0	0	0	0
mmu-miR-6392-5p	0	0	0	0	0	0	0.219437	0	0.299501
mmu-miR-6393	0	0	0	0	0	0	0	0	0
mmu-miR-6394	0	0	0	0	0	0	0	0	0
mmu-miR-6395	0	0.322403	0	0	0	0	0.65831	0	0
mmu-miR-6396	0	0	0	0	0	0	0	0	0
mmu-miR-6397	0	0	0	0	0	0	0	0	0
mmu-miR-6398	0	0	0	0	0	0	0	0	0
mmu-miR-6399	0.486536	0	0	0	0	1.29398	0	0.452574	0
mmu-miR-6400	0	0	0	0	0	0	0	0	0
mmu-miR-6401	0	0	0	0	0	0	0	0	0
mmu-miR-6402	0	0	0	0	0	0	0	0	0
mmu-miR-6403	0	0	0	0	0	0	0	0	0
mmu-miR-6404	0	0	0	0	0	0	0	0	0
mmu-miR-6405	0	0	0	0	0	0	0	0	0
mmu-miR-6406	0	0	0	0	0	0	0	0	0
mmu-miR-6407	0	0	0	0	0	0	0	0	0
mmu-miR-6408	0	0	0	0	0	0	0	0	0
mmu-miR-6409	0	0	0	0	0	0	0	0	0
mmu-miR-6410	0	0	0	0	0	0	0	0	0
mmu-miR-6411	0	0	0	0	0	0	0	0	0
mmu-miR-6412	6.32497	12.8961	9.15469	10.9341	9.46882	8.08737	6.36366	14.0298	5.39102
mmu-miR-6413	0	0	0	0	0	0	0	0	0
mmu-miR-6414	0	0	0	0	0	0	0	0	0
mmu-miR-6415	0	0	0	0	0	0	0	0	0
mmu-miR-6416-3p	0	0	0	0	0	0	0	0	0
mmu-miR-6416-5p	0	0	0	0	0	0	0	0	0
mmu-miR-6417	0	0	0	0	0	0	0	0	0
mmu-miR-6418-3p	9.73072	11.2841	13.9151	13.8114	14.9508	13.2633	14.9217	9.05148	13.178
mmu-miR-6418-5p	0	0	0	0	0	0	0	0	0.299501
mmu-miR-6419	0	0	0	0	0	0	0	0	0
mmu-miR-6420	0	0	0	0	0	0	0	0	0
mmu-miR-6481	14.1095	1.93442	1.46475	1.15095	1.49508	2.58796	0.65831	4.97831	0.299501
mmu-miR-6516-3p	0.486536	0	0.366188	0.287738	0	0	0.219437	0.452574	0.898503
mmu-miR-6516-5p	29.6787	32.8851	27.0979	35.3918	29.9015	34.614	33.3544	39.3739	40.7321
mmu-miR-652-3p	305.544	525.839	511.198	452.9	489.887	489.448	484.955	425.42	339.934
mmu-miR-652-5p	1.94614	0	2.9295	0.287738	0.996718	0.64699	2.4138	0	0.898503
mmu-miR-653-3p	0	0	0	0	0	0	0.219437	0.452574	0
mmu-miR-653-5p	7.78457	11.6065	10.6194	21.0049	16.9442	17.4687	53.9814	6.78861	9.88353
mmu-miR-6537-3p	0.486536	1.61201	1.46475	1.15095	0.498359	1.61747	2.63324	0.905148	1.198
mmu-miR-6537-5p	0	0	0	0	0	0	0	0	0
mmu-miR-6538	24.3268	39.9779	33.3231	43.1607	100.668	7.76388	2.85268	47.0677	17.3711
mmu-miR-6539	0	0	1.09856	0	0	0	0	0	0.299501
mmu-miR-6540-3p	10.7038	17.4097	29.295	14.3869	18.4393	17.7922	10.533	18.5555	15.2746
mmu-miR-6540-5p	231.104	248.895	319.682	321.979	258.648	290.822	341.224	255.252	268.353
mmu-miR-6541	0	0	0	0.287738	0	0	0.438873	0	0
mmu-miR-654-3p	0	0	0	0	0	0	0	0	0
mmu-miR-654-5p	0	0	0	0	0	0	0	0	0
mmu-miR-6546-3p	0	0	0	0	0	0	0	0	0
mmu-miR-6546-5p	0	0	0	0	0	0	0	0.452574	0
mmu-miR-664-3p	344.467	390.752	403.905	359.097	390.713	395.634	347.807	311.371	339.934
mmu-miR-664-5p	153.259	184.414	228.501	178.685	194.858	204.449	151.631	152.97	233.611
mmu-miR-665-3p	36.4902	55.4533	77.2656	63.8779	46.3474	30.732	47.6177	51.5934	37.7371
mmu-miR-665-5p	0	0	0	0	0	0.323495	0	0	0
mmu-miR-666-3p	1117.57	1225.45	1335.49	1523.29	1270.82	1190.78	1664.65	1357.27	1224.96
mmu-miR-666-5p	1228.5	947.219	1229.29	1396.11	1064.49	1345.74	1780.07	973.487	1186.32
mmu-miR-667-3p	330.358	515.844	710.404	386.145	524.772	435.748	372.603	430.85	441.465
mmu-miR-667-5p	34.0575	24.825	32.2245	36.8305	30.8983	27.4971	40.5958	34.3956	35.0416
mmu-miR-668-3p	2564.04	2976.74	3152.14	2897.52	2414.05	2599.6	3758.73	2807.77	2703.9
mmu-miR-668-5p	0.973072	1.93442	0.732375	1.72643	1.49508	3.55844	3.29155	0.905148	1.79701
mmu-miR-669a-3-3p	0.486536	0.322403	0.732375	0.863215	0.996718	0.64699	0	0.452574	0.599002
mmu-miR-669a-3p	8.75764	11.9289	27.4641	20.7171	21.4294	13.2633	19.091	13.5772	13.178
mmu-miR-669a-3p	8.75764	11.9289	27.4641	20.7171	21.4294	13.2633	19.091	13.5772	13.178
mmu-miR-669a-3p	8.75764	11.9289	27.4641	20.7171	21.4294	13.2633	19.091	13.5772	13.178
mmu-miR-669a-3p	8.75764	11.9289	27.4641	20.7171	21.4294	13.2633	19.091	13.5772	13.178
mmu-miR-669a-3p	8.75764	11.9289	27.4641	20.7171	21.4294	13.2633	19.091	13.5772	13.178
mmu-miR-669a-3p	8.75764	11.9289	27.4641	20.7171	21.4294	13.2633	19.091	13.5772	13.178
mmu-miR-669a-3p	8.75764	11.9289	27.4641	20.7171	21.4294	13.2633	19.091	13.5772	13.178
mmu-miR-669a-3p	8.75764	11.9289	27.4641	20.7171	21.4294	13.2633	19.091	13.5772	13.178
mmu-miR-669a-3p	8.75764	11.9289	27.4641	20.7171	21.4294	13.2633	19.091	13.5772	13.178
mmu-miR-669a-3p	8.75764	11.9289	27.4641	20.7171	21.4294	13.2633	19.091	13.5772	13.178
mmu-miR-669a-3p	8.75764	11.9289	27.4641	20.7171	21.4294	13.2633	19.091	13.5772	13.178
mmu-miR-669a-3p	8.75764	11.9289	27.4641	20.7171	21.4294	13.2633	19.091	13.5772	13.178
mmu-miR-669a-5p	11.1903	21.601	15.3799	19.2785	18.4393	31.7025	32.2572	23.5338	26.6556
mmu-miR-669a-5p	11.1903	21.601	15.3799	19.2785	18.4393	31.7025	32.2572	23.5338	26.6556
mmu-miR-669a-5p	11.1903	21.601	15.3799	19.2785	18.4393	31.7025	32.2572	23.5338	26.6556
mmu-miR-669a-5p	11.1903	21.601	15.3799	19.2785	18.4393	31.7025	32.2572	23.5338	26.6556
mmu-miR-669a-5p	11.1903	21.601	15.3799	19.2785	18.4393	31.7025	32.2572	23.5338	26.6556
mmu-miR-669a-5p	11.1903	21.601	15.3799	19.2785	18.4393	31.7025	32.2572	23.5338	26.6556
mmu-miR-669a-5p	11.1903	21.601	15.3799	19.2785	18.4393	31.7025	32.2572	23.5338	26.6556
mmu-miR-669a-5p	11.1903	21.601	15.3799	19.2785	18.4393	31.7025	32.2572	23.5338	26.6556
mmu-miR-669a-5p	11.1903	21.601	15.3799	19.2785	18.4393	31.7025	32.2572	23.5338	26.6556
mmu-miR-669a-5p	11.1903	21.601	15.3799	19.2785	18.4393	31.7025	32.2572	23.5338	26.6556
mmu-miR-669a-5p	11.1903	21.601	15.3799	19.2785	18.4393	31.7025	32.2572	23.5338	26.6556
mmu-miR-669a-5p	11.1903	21.601	15.3799	19.2785	18.4393	31.7025	32.2572	23.5338	26.6556
mmu-miR-669a-5p	11.1903	21.601	15.3799	19.2785	18.4393	31.7025	32.2572	23.5338	26.6556
mmu-miR-669a-5p	11.1903	21.601	15.3799	19.2785	18.4393	31.7025	32.2572	23.5338	26.6556
mmu-miR-669b-3p	0	0	0.366188	0.287738	0.498359	0	0	0	0
mmu-miR-669b-5p	5.35189	7.09286	5.859	8.34441	5.48195	9.70485	10.3135	4.52574	5.39102
mmu-miR-669b-5p	5.35189	7.09286	5.859	8.34441	5.48195	9.70485	10.3135	4.52574	5.39102
mmu-miR-669b-5p	5.35189	7.09286	5.859	8.34441	5.48195	9.70485	10.3135	4.52574	5.39102
mmu-miR-669c-3p	0	0.322403	0	0.287738	0	0	0	0	0
mmu-miR-669c-5p	70.5477	68.9942	66.28	76.8261	73.2588	94.4605	75.4862	75.1273	92.8453
mmu-miR-669d-2-3p	0	0	0	0	0	0.64699	0.219437	0	0.299501
mmu-miR-669d-2-3p	0	0	0	0	0	0.64699	0.219437	0	0.299501
mmu-miR-669d-3p	0	0	0	0	0	0.64699	0.219437	0	0.299501
mmu-miR-669d-3p	0	0	0	0	0	0.64699	0.219437	0	0.299501
mmu-miR-669d-5p	4.86536	4.19124	7.68994	5.46703	8.97046	7.11689	4.38873	3.62059	2.09651
mmu-miR-669d-5p	4.86536	4.19124	7.68994	5.46703	8.97046	7.11689	4.38873	3.62059	2.09651
mmu-miR-669e-3p	0	0.322403	0	0	1.49508	1.29398	0.438873	0	0
mmu-miR-669e-5p	0	0	0.732375	0.287738	0	0.64699	0.219437	1.8103	0.599002
mmu-miR-669f-3p	0.486536	2.90162	3.29569	2.01417	2.49179	3.55844	3.94986	0.905148	2.99501
mmu-miR-669f-5p	1.94614	2.57922	2.9295	4.02833	2.49179	6.1464	5.92479	0.905148	3.29451
mmu-miR-669g	0	0	0	0	0	0	0	0	0
mmu-miR-669h-3p	0	0	0	0	0	0	0	0	0
mmu-miR-669h-5p	2.91921	4.51364	4.02806	4.31607	4.98359	3.23495	5.70535	3.62059	4.19301
mmu-miR-669i	0	0	0.366188	0.287738	0.996718	0.323495	0.438873	0	0
mmu-miR-669j	0	0	0	0	0	0	0	0	0
mmu-miR-669k-3p	0	0	0	0	0	0	0	0	0
mmu-miR-669k-5p	1.45961	2.90162	1.09856	1.15095	0	0.970485	1.31662	0.452574	2.69551
mmu-miR-669k-5p	1.45961	2.90162	1.09856	1.15095	0	0.970485	1.31662	0.452574	2.69551
mmu-miR-669l-3p	0	0	0	0.575476	0	0	0	0	0.299501
mmu-miR-669l-5p	2.43268	2.90162	2.9295	2.87738	3.98687	2.26446	5.26648	3.16802	2.69551
mmu-miR-669m-3p	0	0	0	0	0	0	0	0	0
mmu-miR-669m-3p	0	0	0	0	0	0	0	0	0
mmu-miR-669m-5p	0	0.322403	0.366188	0.287738	0	0	0	0	0
mmu-miR-669m-5p	0	0.322403	0.366188	0.287738	0	0	0	0	0
mmu-miR-669m-5p	0	0.322403	0.366188	0.287738	0	0	0	0	0
mmu-miR-669m-5p	0	0.322403	0.366188	0.287738	0	0	0	0	0
mmu-miR-669m-5p	0	0.322403	0.366188	0.287738	0	0	0	0	0
mmu-miR-669m-5p	0	0.322403	0.366188	0.287738	0	0	0	0	0
mmu-miR-669m-5p	0	0.322403	0.366188	0.287738	0	0	0	0	0
mmu-miR-669m-5p	0	0.322403	0.366188	0.287738	0	0	0	0	0
mmu-miR-669m-5p	0	0.322403	0.366188	0.287738	0	0	0	0	0
mmu-miR-669m-5p	0	0.322403	0.366188	0.287738	0	0	0	0	0
mmu-miR-669n	0	0	0	0	0	0	0	0	0
mmu-miR-669o-3p	8.75764	11.9289	27.4641	20.7171	21.4294	13.2633	19.091	13.5772	13.178
mmu-miR-669o-3p	8.75764	11.9289	27.4641	20.7171	21.4294	13.2633	19.091	13.5772	13.178
mmu-miR-669o-3p	8.75764	11.9289	27.4641	20.7171	21.4294	13.2633	19.091	13.5772	13.178
mmu-miR-669o-3p	8.75764	11.9289	27.4641	20.7171	21.4294	13.2633	19.091	13.5772	13.178
mmu-miR-669o-3p	8.75764	11.9289	27.4641	20.7171	21.4294	13.2633	19.091	13.5772	13.178
mmu-miR-669o-3p	8.75764	11.9289	27.4641	20.7171	21.4294	13.2633	19.091	13.5772	13.178
mmu-miR-669o-3p	8.75764	11.9289	27.4641	20.7171	21.4294	13.2633	19.091	13.5772	13.178
mmu-miR-669o-3p	8.75764	11.9289	27.4641	20.7171	21.4294	13.2633	19.091	13.5772	13.178
mmu-miR-669o-3p	8.75764	11.9289	27.4641	20.7171	21.4294	13.2633	19.091	13.5772	13.178
mmu-miR-669o-3p	8.75764	11.9289	27.4641	20.7171	21.4294	13.2633	19.091	13.5772	13.178
mmu-miR-669o-3p	8.75764	11.9289	27.4641	20.7171	21.4294	13.2633	19.091	13.5772	13.178
mmu-miR-669o-3p	8.75764	11.9289	27.4641	20.7171	21.4294	13.2633	19.091	13.5772	13.178
mmu-miR-669o-5p	2.43268	4.19124	1.83094	6.33024	5.48195	5.49941	5.26648	4.97831	4.19301
mmu-miR-669p-3p	0	0	0	0.287738	0	0	0	0	0
mmu-miR-669p-3p	0	0	0	0.287738	0	0	0	0	0
mmu-miR-669p-5p	11.1903	21.601	15.3799	19.2785	18.4393	31.7025	32.2572	23.5338	26.6556
mmu-miR-669p-5p	11.1903	21.601	15.3799	19.2785	18.4393	31.7025	32.2572	23.5338	26.6556
mmu-miR-669p-5p	11.1903	21.601	15.3799	19.2785	18.4393	31.7025	32.2572	23.5338	26.6556
mmu-miR-669p-5p	11.1903	21.601	15.3799	19.2785	18.4393	31.7025	32.2572	23.5338	26.6556
mmu-miR-669p-5p	11.1903	21.601	15.3799	19.2785	18.4393	31.7025	32.2572	23.5338	26.6556
mmu-miR-669p-5p	11.1903	21.601	15.3799	19.2785	18.4393	31.7025	32.2572	23.5338	26.6556
mmu-miR-669p-5p	11.1903	21.601	15.3799	19.2785	18.4393	31.7025	32.2572	23.5338	26.6556
mmu-miR-669p-5p	11.1903	21.601	15.3799	19.2785	18.4393	31.7025	32.2572	23.5338	26.6556
mmu-miR-669p-5p	11.1903	21.601	15.3799	19.2785	18.4393	31.7025	32.2572	23.5338	26.6556
mmu-miR-669p-5p	11.1903	21.601	15.3799	19.2785	18.4393	31.7025	32.2572	23.5338	26.6556
mmu-miR-669p-5p	11.1903	21.601	15.3799	19.2785	18.4393	31.7025	32.2572	23.5338	26.6556
mmu-miR-669p-5p	11.1903	21.601	15.3799	19.2785	18.4393	31.7025	32.2572	23.5338	26.6556
mmu-miR-669p-5p	11.1903	21.601	15.3799	19.2785	18.4393	31.7025	32.2572	23.5338	26.6556
mmu-miR-669p-5p	11.1903	21.601	15.3799	19.2785	18.4393	31.7025	32.2572	23.5338	26.6556
mmu-miR-670-3p	45.7344	41.59	53.0972	61.576	38.3736	44.6423	48.0566	36.2059	27.2546
mmu-miR-670-5p	0.973072	2.57922	3.29569	0.863215	1.49508	1.94097	1.97493	0	1.198
mmu-miR-671-3p	1032.43	832.444	1075.13	925.941	880.102	1140.32	987.903	886.592	929.052
mmu-miR-6715-3p	0	0	0	0	0	0	0	0	0
mmu-miR-6715-5p	0	0	0	0	0	0	0	0	0
mmu-miR-671-5p	103.632	93.4968	114.617	92.9394	106.15	107.724	130.565	97.756	45.8237
mmu-miR-672-3p	24.8133	23.8578	21.6051	26.4719	23.9212	19.7332	26.9907	28.9647	17.9701
mmu-miR-672-5p	152.286	125.092	115.715	150.199	128.577	143.632	308.528	171.073	252.479
mmu-miR-673-3p	430.098	344.004	369.483	452.037	366.792	514.033	483.419	350.745	432.779
mmu-miR-673-5p	1512.15	1161.62	1320.47	1193.25	1072.47	1498.75	1061.2	1236.43	1106.66
mmu-miR-674-3p	371.713	551.309	572.351	439.664	433.572	381.4	452.478	450.764	481.598
mmu-miR-674-5p	143.042	230.84	248.275	147.322	187.383	192.156	164.139	173.336	176.706
mmu-miR-675-3p	0	0	0	0	0	0	0	0	0
mmu-miR-675-5p	0	0	0	0	0	0	0	0	0
mmu-miR-676-3p	7288.79	7093.5	5259.92	6740.27	4908.84	6457.6	7618.84	5908.81	5817.21
mmu-miR-676-5p	321.6	520.358	518.888	405.711	419.12	415.367	446.334	419.989	371.98
mmu-miR-6769b-3p	3.89229	6.12565	6.22519	2.87738	2.99015	3.23495	3.29155	5.88346	2.69551
mmu-miR-6769b-5p	2.43268	2.90162	3.29569	1.43869	3.48851	3.55844	0.65831	3.16802	1.79701
mmu-miR-677-3p	0	0	0	0	0	0	0	0	0
mmu-miR-677-5p	50.5997	59.3221	75.4347	81.1422	52.3277	67.6104	89.3107	65.6232	60.4992
mmu-miR-678	0	0	0	0	0	0	0	0	0
mmu-miR-679-3p	1.45961	1.28961	0	0.287738	1.99344	2.58796	1.31662	0.452574	1.198
mmu-miR-679-5p	30.1652	31.9179	22.3374	35.1041	25.4163	32.9965	33.7932	34.3956	35.9401
mmu-miR-680	0	0	0	0	0	0	0	0	0
mmu-miR-680	0	0	0	0	0	0	0	0	0
mmu-miR-680	0	0	0	0	0	0	0	0	0
mmu-miR-681	0	0	0	0	0	0	0	0	0
mmu-miR-682	0	0	0	0	0	0	0	0	0
mmu-miR-683	0	0	0	0	0	0	0	0	0
mmu-miR-683	0	0	0	0	0	0	0	0	0
mmu-miR-684	0	0	0	0	0	0	0	0	0
mmu-miR-684	0	0	0	0	0	0	0	0	0
mmu-miR-686	0	0	0	0	0	0	0	0	0
mmu-miR-687	0	0	0	0	0	0	0	0	0
mmu-miR-688	0	0.322403	0	0.575476	0	0	0.219437	0	0
mmu-miR-6896-3p	0	0	0	0	0.498359	0	0	0	0
mmu-miR-6896-5p	8.27111	6.77046	8.05613	7.48119	10.9639	9.05786	5.70535	7.24118	5.99002
mmu-miR-6897-3p	0	0	0	0	0	0	0	0	0
mmu-miR-6897-5p	0.973072	0.644805	0.366188	0.287738	0.996718	0	0.65831	0	0
mmu-miR-6898-3p	0	0.644805	0	0	0	0	0	0.452574	0
mmu-miR-6898-5p	0	0.644805	0	0	0	0	0	0	0
mmu-miR-6899-3p	7.29804	7.41526	5.859	6.0425	9.46882	8.73436	7.68028	9.05148	7.48753
mmu-miR-6899-5p	0	0.644805	0	0.287738	0	0.323495	0.219437	0.452574	0.299501
mmu-miR-690	138.176	34.8195	31.4921	106.751	131.567	39.4664	15.58	64.7181	21.2646
mmu-miR-6900-3p	0.486536	0	0.732375	0.575476	0	0	0.219437	0	0
mmu-miR-6900-5p	0	0	0	0	0	0	0.438873	0	0
mmu-miR-6901-3p	0	0	0	0	0	0	0	0	0
mmu-miR-6901-5p	0	0	0.732375	0.575476	0.996718	0.64699	0	0.452574	0.299501
mmu-miR-6902-3p	0	0	0	0	0	0	0	0	0
mmu-miR-6902-5p	0.486536	1.28961	1.46475	0.863215	0.996718	0.970485	0.877746	1.35772	0
mmu-miR-6903-3p	1.45961	0.644805	0	0.287738	0.498359	0.64699	0.438873	0	0.299501
mmu-miR-6903-5p	1.45961	2.25682	2.9295	2.30191	0.498359	1.94097	3.51098	4.07317	3.29451
mmu-miR-6904-3p	0	0.322403	0	0.287738	0	0	0.219437	0	0
mmu-miR-6904-5p	0	0	0	0	0	0	0	0	0
mmu-miR-6905-3p	0	0	0	0	0	0	0	0	0.299501
mmu-miR-6905-5p	0	0.644805	0	0.863215	0	0.323495	0.219437	0	0.599002
mmu-miR-6906-3p	0.486536	0	0	0	0	0.970485	0.65831	0	1.198
mmu-miR-6906-5p	1.94614	2.25682	0.732375	0.287738	0.996718	1.94097	0.219437	0.905148	1.79701
mmu-miR-6907-3p	0	0	0.366188	0.863215	0	0	1.31662	0.905148	1.79701
mmu-miR-6907-5p	0	0	0.366188	0	0	0	0	0	0
mmu-miR-6908-3p	0	0.967208	0	0.863215	0.996718	0.323495	1.53606	0.452574	0.898503
mmu-miR-6908-5p	0	0.644805	0.366188	0.287738	0	0	0	0	0
mmu-miR-6909-3p	0	0	0	0	0	0	0	0	0
mmu-miR-6909-5p	0	0	0.366188	0	0	0	0.65831	0	0
mmu-miR-691	0	0	0	0	0	0	0	0	0
mmu-miR-6910-3p	0	0	0	0	0	0	0	0	0
mmu-miR-6910-5p	0	0	0	0	0	0	0	0	0
mmu-miR-6911-3p	8.75764	7.73767	9.88707	5.75476	6.97702	7.44038	8.55803	8.14633	11.0815
mmu-miR-6911-5p	0.486536	0	1.09856	0	0	0.323495	0.219437	0.452574	0
mmu-miR-6912-3p	0.486536	0.322403	0	0.575476	0	0.323495	1.31662	0	0
mmu-miR-6912-5p	0.973072	0.322403	0	0.575476	0.996718	1.61747	0.438873	0	0.599002
mmu-miR-6913-3p	7.78457	4.19124	2.56331	6.90572	6.47867	3.55844	4.38873	5.43089	2.69551
mmu-miR-6913-5p	0	0	0	0	0	0	0	0	0
mmu-miR-6914-3p	1.45961	3.22403	3.29569	1.15095	2.99015	2.58796	2.19437	2.26287	5.39102
mmu-miR-6914-5p	0	0	0	0	0	0	0	0	0
mmu-miR-6915-3p	1.45961	3.22403	5.859	4.02833	3.48851	0.970485	5.92479	0.452574	2.09651
mmu-miR-6915-5p	1.45961	0.644805	1.09856	0.575476	0.996718	0.64699	0	0.452574	0.299501
mmu-miR-6916-3p	0	0	0	0	0	0	0	0	0
mmu-miR-6916-5p	0	0.644805	0.366188	0	0.498359	1.29398	0	0	0
mmu-miR-6917-3p	0	0	0	0	0.498359	0	0	0	0
mmu-miR-6917-5p	0	0	0	0	0	0	0	0	0
mmu-miR-6918-3p	0	0	0	0	0	0	0	0	0.299501
mmu-miR-6918-5p	3.40575	1.93442	2.56331	1.72643	0.498359	1.29398	0.65831	1.8103	2.69551
mmu-miR-6919-3p	0	0.322403	0	0	0	0	0	0	0
mmu-miR-6919-5p	0	0	0	0	0	0.323495	0	0	0
mmu-miR-692	0	0	0.366188	0	0.498359	0	0	0	0
mmu-miR-692	0	0	0.366188	0	0.498359	0	0	0	0
mmu-miR-692	0	0	0.366188	0	0.498359	0	0	0	0
mmu-miR-6920-3p	0	0	0.366188	0	0	0	0.219437	0	0
mmu-miR-6920-5p	0	0.644805	0.366188	1.43869	0	0	2.19437	0.452574	0.299501
mmu-miR-6921-3p	0	0	0	0	0	0	0	0	0
mmu-miR-6921-5p	0	0.644805	0	0	0	0	0	0	0
mmu-miR-6922-3p	0.973072	0.322403	0.366188	0.575476	0	0.323495	0	1.8103	0
mmu-miR-6922-5p	0.486536	0.322403	0.732375	2.01417	1.49508	0.970485	0.438873	1.35772	0.299501
mmu-miR-6923-3p	0	0	0	0	0	0	0	0	0
mmu-miR-6923-5p	0	0	0	0	0	0	0	0	0
mmu-miR-6924-3p	0	0	0	0	0	0	0	0	0
mmu-miR-6924-5p	0	0	0	0	0	0	0	0	0
mmu-miR-6925-3p	0	0	0	0	0	0	0	0	0
mmu-miR-6925-5p	0.486536	0	0	0.287738	1.49508	0	0	0.452574	0.299501
mmu-miR-6926-3p	0	0.967208	0.366188	0.287738	0	0	0	0.452574	0.299501
mmu-miR-6926-5p	0	0.322403	0	0	0	0	0	0	0
mmu-miR-6927-3p	0	0	0.732375	0	0.498359	0	0.438873	0	0.599002
mmu-miR-6927-5p	0	0	0.366188	0	0	0	0	0	0
mmu-miR-6928-3p	1.45961	3.54643	1.09856	3.45286	1.99344	2.58796	0.65831	0.452574	1.198
mmu-miR-6928-5p	0	0.322403	0	0.575476	0.996718	0.970485	0.65831	0.452574	0.299501
mmu-miR-6929-3p	2.91921	1.93442	1.83094	2.87738	3.48851	1.61747	1.75549	2.71544	1.79701
mmu-miR-6929-5p	0	0	0	0	0	0	0	0	0
mmu-miR-6930-3p	0	0	0	0	0	0	0	0	0
mmu-miR-6930-5p	0.486536	0	0.366188	0	0	0	0.219437	0.452574	0.299501
mmu-miR-6931-3p	0.486536	0	0.366188	0	0	0.323495	0	0	0
mmu-miR-6931-5p	0	0	0	0	0	0	0	0	0
mmu-miR-6932-3p	0.486536	0	0	0	0	0	0	0.905148	0.299501
mmu-miR-6932-5p	3.40575	3.54643	1.09856	2.01417	0.996718	2.26446	2.4138	0.905148	2.09651
mmu-miR-6933-3p	0	0	0.366188	0.287738	0	0	0.438873	0	0
mmu-miR-6933-5p	1.94614	0.322403	1.09856	0.575476	0.498359	0.323495	0.65831	0.452574	0.299501
mmu-miR-693-3p	0	0.644805	0.732375	1.15095	0.996718	0.64699	1.31662	0	0
mmu-miR-6934-3p	0	0	0	0	0	0	0.219437	0	0
mmu-miR-6934-5p	0	0.967208	0	0.575476	1.49508	0.64699	0.219437	0.452574	1.198
mmu-miR-6935-3p	0	0	0	0	0	0	0	0	0
mmu-miR-6935-5p	0	0.644805	0	0.287738	0	0.323495	0.219437	0	0
mmu-miR-693-5p	0	0	0	0	0	0	0	0	0
mmu-miR-6936-3p	0.486536	0	0	0.287738	0	0	0.438873	0.452574	0.299501
mmu-miR-6936-5p	0.486536	0	0	0.575476	0.498359	0	0	0.905148	0
mmu-miR-6937-3p	0.973072	0	0	0	0	0	0	0	0
mmu-miR-6937-5p	0	0	0	0.287738	0	0	0	0.452574	0
mmu-miR-6938-3p	0	0	0	1.15095	0.498359	1.29398	0	0.905148	0.599002
mmu-miR-6938-5p	0	0	0	0	0	0	0	0	0
mmu-miR-6939-3p	0	0	0.366188	0	0	0	0	0	0
mmu-miR-6939-5p	0	0	0	0	0	0	0	0	0
mmu-miR-694	0	0	0	0	0	0.64699	0.219437	0	0
mmu-miR-6940-3p	3.89229	1.28961	2.56331	1.43869	2.49179	1.94097	2.63324	0.905148	1.198
mmu-miR-6940-5p	0	0	0	0	0	0	0	0	0
mmu-miR-6941-3p	0	0.322403	0	0	0	0	0.877746	0.452574	0
mmu-miR-6941-5p	0	0	0	2.30191	0.498359	0	0.65831	0	0.299501
mmu-miR-6942-3p	0	0	0	0	0	0	0	0	0
mmu-miR-6942-5p	0	0	0.732375	0.575476	0.996718	0	0	0	0
mmu-miR-6943-3p	0	0	0	0.575476	0	0	0	1.35772	0.299501
mmu-miR-6943-5p	0	0	0	0	0	0.323495	0.219437	0	0
mmu-miR-6944-3p	558.543	599.669	674.884	701.506	464.47	734.01	1050.88	561.644	573.245
mmu-miR-6944-5p	0	0	0.732375	0.575476	0.996718	0	0	0	0.299501
mmu-miR-6945-3p	3.89229	6.77046	8.7885	9.20762	7.47538	9.38135	10.7524	8.14633	6.58902
mmu-miR-6945-5p	0	0	0.732375	0	0	0	0	0	0
mmu-miR-6946-3p	0	0.967208	2.19713	1.43869	0.996718	0.323495	0.219437	0.452574	0
mmu-miR-6946-5p	0.486536	0	0.366188	0.863215	0	0	0	0	0.599002
mmu-miR-6947-3p	0	0	0	0	0	0	0	0	0
mmu-miR-6947-5p	0	0.644805	0	1.15095	0	0	0.438873	0.452574	0
mmu-miR-6948-3p	29.6787	19.6666	17.577	29.0616	16.9442	29.438	25.6741	16.7452	20.9651
mmu-miR-6948-5p	0.973072	0.967208	1.09856	1.72643	0	0.970485	0.877746	1.8103	0.299501
mmu-miR-6949-3p	0	0	0	0	0	0	0	0	0
mmu-miR-6949-5p	0	0	0	0	0	0	0	0	0
mmu-miR-695	0	0	0	0	0	0	0	0	0
mmu-miR-6950-3p	0	0	0	0	0	0	0	0	0
mmu-miR-6950-5p	0	0	0	0	0	0	0	0	0
mmu-miR-6951-3p	0	0	0	0	0	0	0	0	0
mmu-miR-6951-5p	0	0.322403	0.366188	0.575476	0.498359	0.64699	0.877746	0.452574	0.299501
mmu-miR-6952-3p	1.94614	0.967208	1.09856	1.43869	0.996718	2.58796	1.53606	0.905148	1.49751
mmu-miR-6952-5p	2.91921	1.28961	0.366188	1.72643	0.498359	1.94097	1.97493	0.452574	0.898503
mmu-miR-6953-3p	11.6769	8.06007	10.6194	8.63215	5.98031	9.70485	11.8496	6.33604	8.08653
mmu-miR-6953-5p	0	0	0	0	0	0	0	0	0
mmu-miR-6954-3p	0.486536	0.322403	0	0	0	0	0.438873	0.452574	0.299501
mmu-miR-6954-5p	0	0	0	0	0	0	0	0	0
mmu-miR-6955-3p	0	0	0.366188	1.15095	0.996718	0.64699	1.75549	0	0
mmu-miR-6955-5p	0.486536	0.967208	1.83094	1.43869	0.996718	3.55844	1.09718	1.8103	4.49252
mmu-miR-6956-3p	0	0	0	0.287738	0	0	0	0	0
mmu-miR-6956-5p	0	0	0	0	0	0	0	0	0
mmu-miR-6957-3p	0	0	0	0	0	0	0	0	0
mmu-miR-6957-5p	0	0	0	0	0	0	0	0	0
mmu-miR-6958-3p	4.37882	2.90162	4.76044	2.01417	4.48523	4.52893	5.70535	3.16802	5.39102
mmu-miR-6958-5p	0	0	0	0	0	0	0	0	0
mmu-miR-6959-3p	0	0	1.09856	0.575476	0.996718	0	0.219437	0	0
mmu-miR-6959-5p	0	0.644805	0	0	0	0.64699	1.31662	0.452574	0.599002
mmu-miR-696	0	0	0	2.30191	0	0	0	0	0
mmu-miR-6960-3p	0	0	0	0	0	0	0	0	0
mmu-miR-6960-5p	0	0	0	0.287738	0	0	0	0	0
mmu-miR-6961-3p	0	0	0	0	0	0	0	0	0
mmu-miR-6961-5p	0	0	0	0	0	0	0	0	0
mmu-miR-6962-3p	2.91921	0.967208	0.732375	0.863215	0	0	0.65831	0.452574	0.599002
mmu-miR-6962-5p	2.43268	0.322403	0	0.287738	0	0.323495	0	0	0.299501
mmu-miR-6963-3p	0	0.322403	0.366188	0	0	0	0.219437	0	0.299501
mmu-miR-6963-5p	0	0	0	0	0	0	0	0	0
mmu-miR-6964-3p	0.973072	0.644805	0	0.575476	0.498359	0.323495	0.877746	0.905148	0
mmu-miR-6964-5p	0	0	0.366188	0.287738	0	0	0	0	0
mmu-miR-6965-3p	0	0	0	0	0	0	0	0	0.299501
mmu-miR-6965-5p	0	0	0	0	0	0	0	0	0
mmu-miR-6966-3p	1.94614	0.967208	2.56331	0.575476	1.49508	2.91145	1.09718	0.905148	1.49751
mmu-miR-6966-5p	0	0.967208	0	0.287738	0.996718	0.323495	0.65831	0.452574	0
mmu-miR-6967-3p	1.94614	0	0	0	0	0	0	0	0
mmu-miR-6967-3p	1.94614	0	0	0	0	0	0	0	0
mmu-miR-6967-5p	0	0	0	0	0	0.64699	0	0	0
mmu-miR-6967-5p	0	0	0	0	0	0.64699	0	0	0
mmu-miR-6968-3p	0	0	0	0	0.996718	0.323495	0.219437	0	0
mmu-miR-6968-5p	0	0	0	0	0	0	0	0	0
mmu-miR-6969-3p	0	0	0	0	0	0	0	0	0
mmu-miR-6969-5p	0	0	0	0	0	0	0	0	0
mmu-miR-697	0	0	0	0	0	0	0	0	0
mmu-miR-6970-3p	0.973072	0.644805	0.732375	1.15095	0	2.26446	1.31662	0.452574	0.599002
mmu-miR-6970-5p	0.486536	2.25682	0.366188	3.16512	2.49179	1.29398	2.4138	2.26287	2.39601
mmu-miR-6971-3p	0.973072	1.28961	1.09856	1.15095	0.996718	1.61747	0.219437	0.452574	1.198
mmu-miR-6971-5p	0	0	0	0	0.498359	0.323495	0.438873	0	0
mmu-miR-6972-3p	0	0	0	0	0	0	0	0	0
mmu-miR-6972-5p	0	0	0	0	0	0	0	0	0
mmu-miR-6973a-3p	0	0	0.366188	0	0	0	0	0	0
mmu-miR-6973a-5p	0	0	0	0	0	0	0	0	0
mmu-miR-6973b-3p	0.973072	0.644805	0.366188	0.575476	1.49508	0.64699	0.219437	1.35772	1.49751
mmu-miR-6973b-5p	0	0	0	0	0	0	0	0	0
mmu-miR-6974-3p	0	0	0	0	0	0	0	0	0
mmu-miR-6974-5p	0	0	0	0	0	0	0	0	0
mmu-miR-6975-3p	0.973072	0	0.366188	0	0	0	0	0	0
mmu-miR-6975-5p	0	0	0	0	0	0	0	0	0
mmu-miR-6976-3p	0	0	0.366188	0.287738	0	0	0	0.452574	0
mmu-miR-6976-5p	0.486536	0	0.366188	0	0.498359	0	0.438873	0.452574	0
mmu-miR-6977-3p	0.973072	4.83604	3.66188	5.75476	3.48851	2.58796	7.89972	4.97831	3.29451
mmu-miR-6977-5p	0	0	0	0	0	0	0	0.905148	0
mmu-miR-6978-3p	0	0	0	0	0	0	0	0	0
mmu-miR-6978-5p	0	0	0	0	0	0	0	0	0
mmu-miR-6979-3p	0	0.322403	0.732375	1.15095	0.996718	1.29398	0	1.35772	1.198
mmu-miR-6979-5p	0	0.322403	0	0	0	0	0	0	0
mmu-miR-6980-3p	0	0	0	0	0	0	0	0	0
mmu-miR-6980-5p	0	0	0	0	0	0	0	0	0
mmu-miR-6981-3p	0	0	0	0	0	0	0	0	0
mmu-miR-6981-5p	0	0	0	0	0	0	0	0	0
mmu-miR-6982-3p	0.486536	1.28961	0.732375	0.575476	1.49508	1.61747	0.65831	0.452574	0.599002
mmu-miR-6982-5p	1.45961	0.644805	0	0	0	0	0.219437	0	0.299501
mmu-miR-6983-3p	0.486536	0	0	0	0	0.64699	0.438873	0.905148	0
mmu-miR-6983-5p	0	0	0	0	0	0	0	0	0.299501
mmu-miR-698-3p	0	0.322403	0	0.575476	0.996718	0	1.09718	0	0.299501
mmu-miR-6984-3p	0.486536	1.28961	0.366188	0.575476	0	0.64699	0	0.452574	0.898503
mmu-miR-6984-5p	0.486536	1.61201	0.732375	0	0	0.323495	0.219437	0.452574	0
mmu-miR-6985-3p	1.94614	2.25682	4.39425	2.58964	3.98687	5.17592	2.19437	1.8103	1.198
mmu-miR-6985-5p	0.973072	0.322403	0	2.30191	0.498359	0	0.65831	0.452574	0.299501
mmu-miR-698-5p	0	0	0.366188	0.287738	0	0.323495	0.438873	0	0
mmu-miR-6986-3p	0	0	0	0	0	0	0	0	0
mmu-miR-6986-5p	4.37882	3.22403	6.22519	5.46703	3.98687	6.4699	2.19437	2.71544	3.89351
mmu-miR-6987-3p	0	0	0.732375	0.287738	0	0	0	0	0.299501
mmu-miR-6987-5p	0.486536	0.322403	0	0	0	0	0.219437	0	0
mmu-miR-6988-3p	1.94614	4.19124	3.29569	2.01417	2.99015	3.23495	5.70535	1.8103	1.198
mmu-miR-6988-5p	0	0	0	0	0	0	0	0	0
mmu-miR-6989-3p	1.94614	4.83604	6.59138	6.61798	4.98359	3.88194	3.29155	1.8103	3.29451
mmu-miR-6989-5p	0	0	0	0	0	0	0	0	0.299501
mmu-miR-6990-3p	0.973072	0.967208	1.09856	1.15095	0.498359	0.970485	0.438873	0.905148	0.898503
mmu-miR-6990-5p	3.89229	2.90162	5.49281	2.01417	2.99015	3.23495	2.85268	4.52574	3.29451
mmu-miR-6991-3p	0	0	0	0	0	0	0	0	0
mmu-miR-6991-5p	0	0.967208	0	0	0	0	0	0	0
mmu-miR-6992-3p	0	0	0	0	0	0	0	0	0
mmu-miR-6992-5p	0	0	0	0	0	0	0	0	0
mmu-miR-6993-3p	0	0	0	0	0	0	0	0	0
mmu-miR-6993-5p	0.486536	0	0	0	0	0	0.65831	0	0
mmu-miR-6994-3p	0	1.93442	0.366188	0.863215	1.99344	0.970485	1.09718	2.71544	1.198
mmu-miR-6994-5p	1.45961	3.22403	3.29569	1.43869	2.49179	1.94097	1.09718	3.16802	3.89351
mmu-miR-6995-3p	0	0	0	0	0.498359	0.323495	0	0	0
mmu-miR-6995-5p	0.486536	0.322403	0	0	0.498359	0	0	0	0
mmu-miR-6996-3p	0	0	0	0	0	0	0	0	0
mmu-miR-6996-5p	1.94614	1.28961	2.56331	2.30191	1.99344	0.970485	1.31662	1.8103	2.09651
mmu-miR-6997-3p	0	0	2.19713	0.287738	0	0	0.438873	0.452574	1.198
mmu-miR-6997-5p	0.973072	1.93442	3.66188	2.01417	2.99015	1.61747	1.31662	2.26287	2.99501
mmu-miR-6998-3p	0.486536	0.322403	2.56331	0.863215	0	0.323495	0.438873	0.452574	0.299501
mmu-miR-6998-5p	0.973072	1.28961	0.732375	0.287738	1.49508	0.970485	0.877746	0.452574	1.49751
mmu-miR-6999-3p	0.973072	0.644805	1.83094	1.72643	0.498359	1.29398	0.877746	1.35772	4.49252
mmu-miR-6999-5p	0.486536	1.28961	2.19713	0.863215	1.49508	0.970485	0.219437	0.905148	1.79701
mmu-miR-7000-3p	3.89229	3.86883	3.29569	2.87738	0.996718	0.970485	2.85268	1.8103	4.49252
mmu-miR-7000-5p	0	0	0	0	0	0.323495	0.219437	0	0
mmu-miR-7001-3p	0	0	0.366188	0	0	0	0	0.452574	0
mmu-miR-7001-5p	0	0	0	0	0	0	0	0	0
mmu-miR-7002-3p	0	0	0	0	0	0	0	0	0
mmu-miR-7002-5p	0	0	0	0	0	0	0	0	0
mmu-miR-7003-3p	0	0	0	0	0	0	0	0	0
mmu-miR-7003-5p	0	0	0	0	0	0	0	0	0
mmu-miR-700-3p	20.921	24.5026	33.3231	52.3683	49.3375	43.9953	50.4704	33.4905	41.3311
mmu-miR-7004-3p	2.91921	1.93442	0.732375	2.30191	2.99015	1.61747	0.65831	1.8103	0.898503
mmu-miR-7004-5p	0.973072	1.93442	1.46475	1.15095	0.996718	3.55844	1.53606	2.26287	2.09651
mmu-miR-7005-3p	0	0	0	0	0	0	0	0	0
mmu-miR-7005-5p	0	0	0.366188	0	0	0	0	0	0
mmu-miR-700-5p	16.5422	21.2786	27.0979	24.7455	34.8851	21.6742	21.0659	24.8916	27.8536
mmu-miR-7006-3p	0	0	0	0	0	0	0	0	0
mmu-miR-7006-5p	0	0	0	0	0	0	0	0	0
mmu-miR-7007-3p	0	0	0	0	0.498359	0	0	0.905148	0
mmu-miR-7007-5p	0	0	0	0	0	0.323495	0	0	0
mmu-miR-7008-3p	0	0	0	0.287738	0.996718	0.64699	0.219437	0	0
mmu-miR-7008-5p	0	0.644805	0	0	0.996718	0.64699	0.438873	0	0
mmu-miR-7009-3p	0	0	0	0	0	0	0	0	0
mmu-miR-7009-5p	0	0	0	0.287738	0	0	0	0	0
mmu-miR-7010-3p	0	0	0	0.575476	0	0	0	0.452574	0
mmu-miR-7010-5p	2.91921	2.25682	4.02806	1.43869	5.48195	0.970485	4.8276	5.43089	3.89351
mmu-miR-7011-3p	0	0	0.366188	1.43869	0	0	0.438873	0	0.299501
mmu-miR-7011-5p	0	0	0	0	0	0	0	0	0
mmu-miR-7012-3p	1.45961	1.61201	1.09856	0.287738	2.49179	1.29398	0.877746	1.35772	0.599002
mmu-miR-7012-5p	0	0	1.83094	0	0	0	0.438873	0	0
mmu-miR-7013-3p	1.94614	0.967208	1.46475	1.72643	1.49508	0.970485	1.09718	0.905148	0.898503
mmu-miR-7013-5p	3.89229	2.90162	0.732375	2.30191	1.99344	1.61747	1.75549	2.71544	2.09651
mmu-miR-701-3p	0	1.61201	0.366188	1.72643	0	0.323495	1.09718	0.452574	0.299501
mmu-miR-7014-3p	0	0	0	0	0	0	0	0	0
mmu-miR-7014-5p	0	0	0	0	0	0	0	0	0
mmu-miR-7015-3p	19.948	32.5627	35.5202	24.4577	20.4327	27.1736	24.3575	30.775	28.4526
mmu-miR-7015-5p	0	0	0.366188	0	0	0	0	0	0.299501
mmu-miR-701-5p	0.973072	0.967208	0.732375	0	0.996718	0	0.65831	0	0.898503
mmu-miR-7016-3p	1.45961	1.28961	1.83094	0.575476	0	1.29398	0.438873	0	0.299501
mmu-miR-7016-5p	1.45961	0.322403	0.366188	0	0.498359	0.323495	0.438873	0	0.299501
mmu-miR-7017-3p	0	0	0	0	0	0	0	0	0
mmu-miR-7017-5p	0.486536	0.644805	0.732375	0.575476	0	1.29398	1.31662	0	0.299501
mmu-miR-7018-3p	0	0	0	0	0	0	0	0	0
mmu-miR-7018-5p	0	0	0	0	0	0	0	0	0
mmu-miR-7019-3p	3.40575	2.90162	4.02806	4.60381	3.48851	3.88194	4.38873	0.905148	4.19301
mmu-miR-7019-5p	0	0	0.366188	0	0	0	0.877746	0	0
mmu-miR-7020-3p	0	0	0.366188	0	0	0	0	0.905148	0
mmu-miR-7020-5p	0	0.322403	0	0	0	0	0	0	0
mmu-miR-7021-3p	0	0	0	0	0	0	0	0	0
mmu-miR-7021-5p	2.91921	2.25682	0.732375	4.02833	0.498359	3.23495	1.09718	0.905148	2.09651
mmu-miR-7022-3p	0	1.28961	3.29569	2.30191	0	0.64699	2.4138	0.452574	0.898503
mmu-miR-7022-5p	0.486536	0.322403	0	0.575476	0	0.323495	0.877746	0	0
mmu-miR-7023-3p	0	0	0.366188	0.575476	0	0.64699	0.438873	0	0
mmu-miR-7023-5p	0	0	0	0	0	0	0	0	0
mmu-miR-702-3p	11.6769	9.02728	15.7461	11.2218	8.97046	10.0283	24.5769	6.33604	8.38603
mmu-miR-7024-3p	0	0	0.366188	0	0	0	0	0	0.299501
mmu-miR-7024-5p	0.486536	0	0	0	0	0.64699	0.438873	0	0
mmu-miR-7025-3p	0	0	0	0	0	0	0	0	0
mmu-miR-7025-5p	0	0	0	0	0	0	0	0	0
mmu-miR-702-5p	1.45961	0.322403	0.366188	0.575476	0.498359	0.64699	0.438873	2.71544	2.69551
mmu-miR-7026-3p	0.486536	0.967208	0.732375	0	0.498359	0.323495	0.438873	0.452574	0.299501
mmu-miR-7026-5p	0.486536	0	0	0.863215	0.498359	0	0	0.452574	0.299501
mmu-miR-7027-3p	0	0	0.366188	0	0.498359	0	0	0	0
mmu-miR-7027-5p	0	0	0	0	0	0	0	0	0
mmu-miR-7028-3p	0	0	0.366188	0	0	0	0	0	0
mmu-miR-7028-5p	0	0	0	0.287738	0	0	0.219437	0	0.299501
mmu-miR-7029-3p	0.486536	0	1.46475	0	0	0	0	0	0.299501
mmu-miR-7029-5p	0	0.322403	0	0.575476	0	0	0	0	0
mmu-miR-703	0	0	0	0	0	0	0	0	0
mmu-miR-7030-3p	1.45961	0	0	0.287738	0	0	0.219437	0	0
mmu-miR-7030-5p	0	0	0	0	0	0	0	0	0
mmu-miR-7031-3p	0.973072	0	0.366188	0.863215	0	0.64699	0	0	0
mmu-miR-7031-5p	3.89229	0.322403	0.366188	0.287738	1.99344	0.970485	0.877746	0.452574	1.198
mmu-miR-7032-3p	1.94614	2.57922	1.46475	0.863215	1.49508	2.91145	3.29155	0.905148	1.49751
mmu-miR-7032-5p	0	0	0	0	0	0	0	0	0
mmu-miR-7033-3p	0	0.644805	0.366188	0.287738	0.498359	1.29398	0.438873	0	0.599002
mmu-miR-7033-5p	0.486536	0	1.46475	0.863215	0.498359	0	0	0	0.299501
mmu-miR-7034-3p	0.486536	0.644805	0.366188	0	1.49508	0.323495	0	0	0
mmu-miR-7034-5p	0	0.322403	0	0.575476	0	0	0	0	0
mmu-miR-7035-3p	0	0	0.732375	0.575476	1.49508	1.29398	0.438873	0	0
mmu-miR-7035-5p	0	0	0	0	0	0	0	0	0
mmu-miR-7036a-3p	0.486536	1.28961	0	1.15095	0	0.323495	1.09718	0	1.49751
mmu-miR-7036a-5p	0	0.322403	0	0.287738	0	0.64699	0	0	0
mmu-miR-7036b-3p	0	0	0	0	0	0.323495	0.219437	0	0.299501
mmu-miR-7036b-5p	0	1.61201	0.366188	0.575476	0.996718	0.323495	0.438873	0.452574	0.299501
mmu-miR-7037-3p	0.486536	0	0.366188	0.575476	0	0	0	0	0
mmu-miR-7037-5p	0	0	0	0	0	0	0	0	0
mmu-miR-7038-3p	0.486536	0.322403	0	0.287738	1.49508	0.64699	0.877746	0.452574	0.599002
mmu-miR-7038-5p	0.486536	0.322403	0.732375	0.287738	0	1.29398	0.438873	0.452574	0
mmu-miR-7039-3p	0	0	0	0.287738	0	0	0	0	0
mmu-miR-7039-5p	0	0.322403	0.366188	0	1.49508	0	0.438873	0	0
mmu-miR-704	0	0.644805	0.366188	0.863215	0	0.970485	2.63324	1.8103	1.198
mmu-miR-7040-3p	0	0	0	0	0	0	0	0	0
mmu-miR-7040-5p	0	0	0	0	0	0	0	0	1.198
mmu-miR-7041-3p	0	0	0	0	0	0	0	0	0
mmu-miR-7041-5p	0	0	0.366188	0	0	0	0	0.452574	0
mmu-miR-7042-3p	0	0	0	0	0	0	0.219437	0.452574	0
mmu-miR-7042-5p	0.486536	2.57922	3.29569	1.15095	1.49508	0.323495	0.438873	0	2.09651
mmu-miR-7043-3p	0	0	0	0	0	0	0.219437	0	0.599002
mmu-miR-7043-5p	0	0	0	0	0	0	0.219437	0	0
mmu-miR-7044-3p	0.973072	2.25682	1.83094	1.15095	1.99344	1.29398	0.438873	1.8103	1.79701
mmu-miR-7044-5p	0	0.322403	0	0	0.996718	0	0	0	0
mmu-miR-7045-3p	0	0	0	0	0	0	0	0	0
mmu-miR-7045-5p	0	0	0	0	0	0	0	0	0
mmu-miR-7046-3p	5.35189	13.8633	15.7461	8.05667	11.4623	8.08737	3.94986	14.0298	6.88852
mmu-miR-7046-5p	0	0	0	0	0.498359	0	0	0	0
mmu-miR-7047-3p	29.1921	28.3714	52.731	30.5002	33.39	32.026	32.9155	24.8916	30.5491
mmu-miR-7047-5p	1.94614	0.322403	0	0	1.49508	0.970485	0.438873	0.905148	0.599002
mmu-miR-7048-3p	0.486536	0.322403	0.732375	0.287738	1.99344	1.29398	1.97493	1.35772	0.299501
mmu-miR-7048-5p	0	0	0	0	0	0	0	0	0.299501
mmu-miR-7049-3p	0	0	0	0	0	0	0	0	0
mmu-miR-7049-5p	0.973072	0.322403	0.732375	0.575476	0	0.64699	0.219437	1.8103	0.599002
mmu-miR-705	0	0	0	0	0	0	0	0	0
mmu-miR-7050-3p	0	0	0	0	0	0	0	0	0
mmu-miR-7050-5p	0	0	0	0	0	0	0	0	0
mmu-miR-7051-3p	0	0	0	0	0	0	0	0	0
mmu-miR-7051-5p	0	0.322403	0.366188	0.287738	0.498359	0	0.877746	0	0
mmu-miR-7052-3p	3.40575	3.22403	0.732375	2.30191	2.49179	1.29398	2.63324	2.26287	0.898503
mmu-miR-7052-5p	0	0.322403	0	0	0	0	0	0	0
mmu-miR-7053-3p	0	0	0.732375	0.287738	0	0	0.219437	0	0
mmu-miR-7053-5p	0	0	0	0	0	0	0	0	0
mmu-miR-7054-3p	0	0	0	0	0	0	0	0	0
mmu-miR-7054-5p	0	0	0.366188	0.287738	1.99344	0.64699	0.65831	0.452574	0.299501
mmu-miR-7055-3p	3.89229	1.93442	1.46475	2.30191	3.48851	1.29398	0.65831	1.8103	0.599002
mmu-miR-7055-5p	0.486536	0.967208	2.19713	1.72643	0.498359	1.29398	0.219437	0	0
mmu-miR-7056-3p	0	0	0	0	0	0	0	0	0
mmu-miR-7056-5p	0.486536	0.967208	2.19713	0.287738	0.498359	1.29398	1.75549	0.452574	0.898503
mmu-miR-7057-3p	0	0.644805	0	0	0	0	0	0	0
mmu-miR-7057-5p	0	0	0	0	0	0	0	0	0
mmu-miR-7058-3p	0	0	0	0.287738	0	0	0	0	0
mmu-miR-7058-5p	0	0	0	0	0	0	0.65831	0	0
mmu-miR-7059-3p	0	0	0	0	0	0	0	0	0
mmu-miR-7059-5p	3.40575	2.90162	3.29569	3.7406	4.98359	2.91145	4.60817	2.71544	3.29451
mmu-miR-706	0.486536	0	0	0.575476	0.498359	0	0.219437	0.452574	0
mmu-miR-7060-3p	0	0	0	0	0	0	0	0	0
mmu-miR-7060-5p	0	0	0.366188	0	0	0	1.09718	0	0
mmu-miR-7061-3p	0	0	0	0	0	0	0	0.452574	0
mmu-miR-7061-5p	0	0	0	0	0	0	0	0	0.299501
mmu-miR-7062-3p	0	0	0	0	0	0	0	0	0
mmu-miR-7062-5p	0	0	0.366188	0.287738	0	0	0.219437	0	0.299501
mmu-miR-7063-3p	0.486536	0.644805	0.366188	0.863215	0	0	0	0	0
mmu-miR-7063-5p	2.91921	2.90162	6.22519	3.7406	1.49508	2.58796	1.75549	2.71544	3.29451
mmu-miR-7064-3p	0	0	0	0	0	0.323495	0.219437	0	0
mmu-miR-7064-5p	0	0.644805	0.732375	0	0.498359	0	0.219437	0	0
mmu-miR-7065-3p	0	0.322403	0	0.287738	0	0.64699	0.65831	0.452574	0.299501
mmu-miR-7065-5p	0	0	0	0	0	0	0.219437	0	0
mmu-miR-7066-3p	0.973072	0.322403	2.19713	1.15095	0.996718	1.61747	1.31662	2.26287	3.29451
mmu-miR-7066-5p	2.91921	0.644805	0.732375	0.287738	0.996718	1.61747	3.51098	4.52574	0.299501
mmu-miR-7067-3p	0	0	0	0	0.498359	0	0	0	0
mmu-miR-7067-5p	0	0	0	0	0	0	0	0	0
mmu-miR-7068-3p	23.8403	14.1857	15.3799	16.6888	16.9442	23.9386	31.5989	14.9349	12.8785
mmu-miR-7068-5p	0	0	0.366188	0.287738	0	0	0.65831	0	0
mmu-miR-7069-3p	0.973072	1.93442	1.83094	0	0.996718	0.323495	0.219437	0.452574	1.198
mmu-miR-7069-5p	0	0.322403	1.09856	0.863215	0	0	0.219437	0	0.898503
mmu-miR-707	0	0	0	0	0	0	0	0	0
mmu-miR-7070-3p	0.486536	0	0.732375	0.863215	0	0	0.219437	0.452574	0.898503
mmu-miR-7070-5p	0	0	0	0	0	0.323495	0	0	0
mmu-miR-7071-3p	0	1.28961	0.366188	1.72643	0.498359	0.64699	0.65831	0.452574	0.299501
mmu-miR-7071-5p	0	0	0.366188	0	0	0	0	0	0
mmu-miR-7072-3p	0	0	0	0	0	0	0	0	0
mmu-miR-7072-5p	0	0	0	0	0	0	0	0	0
mmu-miR-7073-3p	0	0	0	0	0.996718	0	0.219437	0	0.898503
mmu-miR-7073-5p	0	0.644805	0.732375	2.01417	2.49179	0.970485	1.53606	0.452574	2.09651
mmu-miR-7074-3p	0	0	0.366188	0.287738	0	0	0	0	0
mmu-miR-7074-5p	0	0	0	0	0	0	0	0	0
mmu-miR-7075-3p	1.94614	1.61201	0.366188	0.863215	0.498359	1.94097	2.19437	0.905148	1.79701
mmu-miR-7075-5p	0	0	0	0	0	0	0	0	0
mmu-miR-7076-3p	0	0	0	0	0	0	0	0	0
mmu-miR-7076-5p	0	0	0	0	0	0	0	0	0
mmu-miR-7077-3p	0.973072	0	0	0	0	0	0	0	0
mmu-miR-7077-5p	0	0	0	0	0	0	0	0	0
mmu-miR-7078-3p	0	0	0	0	0	0	0	0	0
mmu-miR-7078-5p	0	0	0	0	0.498359	0	0.438873	0	0
mmu-miR-7079-3p	0	0.322403	0	0	0	0	0.219437	0	0
mmu-miR-7079-5p	0	0	0	0.575476	0	0	0	0	0.299501
mmu-miR-7080-3p	513.295	331.43	400.609	422.975	253.665	319.613	615.958	318.612	212.945
mmu-miR-7080-5p	13.1365	17.4097	18.6756	18.4152	15.4491	22.3211	33.7932	24.8916	10.4825
mmu-miR-7081-3p	0.486536	0	1.09856	0.575476	0.498359	0.64699	0.438873	0.452574	0.299501
mmu-miR-7081-5p	0.973072	0	0	0	0	0	0	0	0
mmu-miR-7082-3p	1.94614	2.90162	0.366188	0.863215	0.498359	2.58796	4.38873	0.452574	1.198
mmu-miR-7082-5p	0	0	0	0	0	0	0	0	0
mmu-miR-7083-3p	0.486536	0	0.366188	0	0.498359	0.323495	0.219437	0	0
mmu-miR-7083-5p	0.973072	1.61201	2.56331	0.287738	1.99344	1.61747	1.09718	1.35772	0.898503
mmu-miR-708-3p	1759.31	2168.48	2730.66	2154.3	2311.89	2226.62	1927.31	2135.24	2164.49
mmu-miR-7084-3p	0.973072	0.644805	0	0.575476	0	0.323495	1.09718	0	0.299501
mmu-miR-7084-5p	0.973072	0.644805	0.366188	0.863215	0	0	1.31662	0.905148	1.79701
mmu-miR-7085-3p	0	0	0.732375	1.72643	0	0.323495	0.219437	0.452574	0
mmu-miR-7085-5p	0	0	0	0	0.996718	0	0	0	0.299501
mmu-miR-708-5p	862.628	1179.03	1325.23	953.277	1141.74	812.296	762.323	1093.42	833.811
mmu-miR-7086-3p	0	0	0	0	0	0	0	0	0
mmu-miR-7086-5p	0	0	0	0	0	0	0	0	0
mmu-miR-7087-3p	0	0	0	0	0	0	0	0	0
mmu-miR-7087-5p	0	0	0	0	0	0.970485	0.438873	0	1.198
mmu-miR-7088-3p	0	0	0	0	0	0	0	0	0
mmu-miR-7088-5p	0	0	0	0	0	0	0	0	0
mmu-miR-7089-3p	0	0	0	0	0	0	0	0	0
mmu-miR-7089-5p	0	0	0	0.287738	0	0	0	0	0
mmu-miR-709	4.86536	2.25682	2.9295	1.72643	5.98031	0.323495	1.31662	4.07317	5.99002
mmu-miR-7090-3p	0	0	0	0	0	0	0	0	0
mmu-miR-7090-5p	0.486536	0	0	0	0	0	0.219437	0	0.299501
mmu-miR-7091-3p	0	0	0.732375	0	0	0	0	0	0
mmu-miR-7091-5p	0	0	0.366188	0.287738	0	0	0	0	0
mmu-miR-7092-3p	0.973072	0.322403	0.366188	1.15095	0.498359	0.970485	0.877746	0.905148	0.898503
mmu-miR-7092-5p	0.486536	0.322403	1.09856	0.575476	0	0.323495	0.65831	0	0.599002
mmu-miR-7093-3p	4.37882	3.54643	2.9295	3.45286	3.98687	4.85242	4.8276	2.71544	5.69052
mmu-miR-7093-5p	0	0.644805	0	0	0.498359	0.323495	0.219437	0	0.299501
mmu-miR-7094-1-5p	0	0	0	0	0	0	0	0	0
mmu-miR-7094-3p	0	0	0	0	0	0	0	0	0
mmu-miR-7094-3p	0	0	0	0	0	0	0	0	0
mmu-miR-7094b-2-5p	0	0	0	0	0	0	0	0	0
mmu-miR-710	0	0	0	0	0	0	0	0	0
mmu-miR-711	0	0	0	0	0	0	0	0	0
mmu-miR-7115-3p	0	0	0.732375	0	0	0	0	0	0
mmu-miR-7115-5p	0	0.322403	0	0	0	0.323495	0.219437	0	0
mmu-miR-7116-3p	0.486536	2.25682	0	1.15095	2.99015	3.23495	1.53606	0.452574	0.299501
mmu-miR-7116-5p	0.486536	0	0	0.287738	0.498359	0	0.219437	0.452574	0.299501
mmu-miR-7117-3p	0	0.322403	0.366188	0	0	0.323495	0	0.452574	0
mmu-miR-7117-5p	0.486536	2.25682	1.09856	0.575476	1.99344	1.29398	0.877746	0	2.69551
mmu-miR-7118-3p	0.486536	0.322403	0.366188	0	0.498359	0.64699	0.65831	1.35772	0.299501
mmu-miR-7118-5p	0	0	0	0	0	0	0	0	0
mmu-miR-7119-3p	0	0	0	0	0	0	0	0	0
mmu-miR-7119-5p	0	0	0	0	0	0	0	0	0
mmu-miR-712-3p	0	0	0.366188	0	0	0	0	0	0
mmu-miR-712-5p	3.89229	1.93442	1.83094	1.15095	2.99015	1.94097	1.09718	3.16802	0.898503
mmu-miR-713	0	0	0	0	0	0	0	0	0
mmu-miR-714	1.45961	2.57922	3.66188	4.02833	3.98687	0.970485	1.09718	4.97831	2.69551
mmu-miR-717	0	0	0	0	0	0	0	0	0
mmu-miR-718	0	0	0	0	0	0	0	0	0
mmu-miR-719	0	0	0	0	0	0	0	0	0
mmu-miR-721	0	0	0	0	0	0	0	0	0
mmu-miR-7210-3p	0	0	0	0	0	0	0	0	0
mmu-miR-7210-5p	0	0	0	0	0	0	0	0	0
mmu-miR-7211-3p	0	0	0	0	0	0	0	0.452574	0
mmu-miR-7211-5p	0.486536	0	0.366188	0.287738	0	0.323495	0.65831	0.905148	0.299501
mmu-miR-7212-3p	0	0.322403	0	0	0	0	0.219437	0	0
mmu-miR-7212-5p	0	0	0.366188	0	0	0	0	0	0
mmu-miR-7213-3p	0	0	0	0	0	0	0	0	0
mmu-miR-7213-5p	3.40575	2.57922	0.366188	1.43869	1.99344	0.970485	1.53606	1.8103	2.69551
mmu-miR-7214-3p	0	0	0	0	0	0	0	0	0
mmu-miR-7214-5p	0	0	0	0	0	0	0	0	0
mmu-miR-7215-3p	0	0	0	0	0	0	0	0	0
mmu-miR-7215-5p	0	0	0	0	0	0	0	0	0
mmu-miR-7216-3p	0	0	0	0	0	0	0	0	0
mmu-miR-7216-5p	0	0	0	0	0	0	0	0	0
mmu-miR-7217-3p	0	0	0	0	0	0	0	0	0
mmu-miR-7217-5p	0	0	0	0	0	0	0	0	0
mmu-miR-7218-3p	0	0	0	0	0	0	0	0	0
mmu-miR-7218-5p	0	0	0	0	0	0	0	0	0
mmu-miR-7219-3p	0	0	0	0	0	0.323495	0	0	0
mmu-miR-7219-5p	0	0	0	0	0	0	0	0	0
mmu-miR-7220-3p	1.94614	0.322403	0.732375	0	0.498359	0.64699	0	0.905148	0.299501
mmu-miR-7220-5p	46.7074	48.3604	49.0691	54.958	48.3408	54.6706	33.3544	46.6151	53.0117
mmu-miR-7221-3p	0	0	0	0	0	0	0	0	0
mmu-miR-7221-5p	0	0	0	0	0	0	0	0	0
mmu-miR-7222-3p	0	0	0	0	0	0	0	0	0
mmu-miR-7222-5p	0	0	0	0	0	0	0	0	0
mmu-miR-7223-3p	0	0	0	0	0	0	0	0	0
mmu-miR-7223-5p	0	0	0	0	0	0	0	0	0
mmu-miR-7224-3p	13.623	17.0873	31.126	23.0191	21.4294	21.9977	32.696	23.0813	32.9451
mmu-miR-7224-5p	0	0	0	0	0	0	0	0	0
mmu-miR-7225-3p	0	0	0	0	0	0	0	0	0
mmu-miR-7225-5p	0	0	0	0	0	0	0	0	0
mmu-miR-7226-3p	10.7038	9.34968	13.9151	17.8398	11.9606	12.9398	13.6051	9.50405	17.3711
mmu-miR-7226-5p	0	0	0	0	0	0	0.219437	0	0
mmu-miR-7227-3p	0	0	0	0	0	0	0	0	0.599002
mmu-miR-7227-5p	0	0	0	0	0	0	0	0	0
mmu-miR-7228-3p	0	0	0	0	0	0	0	0	0
mmu-miR-7228-5p	0	0	0	0	0	0	0	0	0
mmu-miR-7229-3p	0	0	0	0	0	0	0	0	0
mmu-miR-7229-5p	0	0	0	0	0	0	0	0	0
mmu-miR-7230-3p	0	0	0	0	0	0	0	0	0
mmu-miR-7230-5p	0	0	0	0	0	0	0	0	0
[truncated: 236 more rows]
